# Supplementary material for: Microbial signatures in the lower airways of mechanically ventilated COVID19 patients associated with poor clinical outcome
Source: Research Square preprint supplement (doi:10.21203/rs.3.rs-266050/v1), 2021-03-29
Supplement: Supplementary file 2 [file 5853c3c76be975043d3d40a9.docx]

***Table 1. NYU Manhattan Bronchoscopy Cohort***

|  |  | **Outcomes** |  |  |
| --- | --- | --- | --- | --- |
| **Variable** | **MV≤28 days** | **MV>28 days** | **Deceased** | ***p-value*** |
| **N** | 52(37) | 56(39) | 34(24) |  |
| **Age** | 59[38-67] | 64[47-71] | 64[56-72] | 0.094 |
| **Sex (Male)** | 40(76.9) | 46(82.1) | 25(73.5) | 0.608 |
| **Race/Ethnicity** |  |  |  | 0.231 |
| Caucasian | 25(48.1) | 28(50) | 14(41.2) |  |
| Hispanic or Latino | 10(19.2) | 16(28.6) | 8(23.5) |  |
| AAM | 1(1.9) | 4(7.1) | 6(17.6) |  |
| Asian | 4(7.7) | 4(7.1) | 1(2.9) |  |
| Other | 22(42.3) | 20(35.7) | 13(38.2) |  |
| **BMI** | 29[25-32] | 26[23-29] | 29[25-33] | 0.094 |
| **Comorbidities** |  |  |  |  |
| Hyperlipidemia | 11(21.2) | 19(33.9) | 7(20.6) | 0.226 |
| Hypertension | 29(55.8) | 23(41.1) | 17(50) | 0.306 |
| CHF | 2(3.8) | 3(5.4) | 3(8.8) | 0.615 |
| CAD | 5(9.6) | 8(14.3) | 5(14.7) | 0.705 |
| Diabetes | 18(34.6) | 23(41.1) | 13(38.2) | 0.788 |
| Asthma | 1(1.9) | 0(0) | 1(2.9) | 0.478 |
| CKD | 4(7.7) | 3(5.4) | 8(23.5) | ***0.017*#*** |
| CVA | 3(5.8) | 10(17.9) | 13(38.2) | ***0.001*#*** |
| **Smoking Status** |  |  |  | 0.846 |
| Ever | 10(19.2) | 13(23.2) | 8(23.5) |  |
| Never | 42(80.8) | 43(76.8) | 26(76.5) |  |
| **Bio-Markers¥** |  |  |  |  |
| IL-6 | 83[44-180] | 40[16-143] | 113[23-214] | 0.284 |
| Lymphocytes | 9[7-12] | 6[4-8] | 4[3-6] | ***<0.001*#$*** |
| WBC | 10.7[8.9-13.4] | 12.2[9.8-15.7] | 14.2[11-17.4] | ***0.004**** |
| Ferritin | 1286[722-2513] | 1448[915-2352] | 1882[1001-2893] | 0.240 |
| CRP | 49[23-135] | 82[36-138] | 66[37-157] | 0.224 |
| D-Dimer | 2038[956-3592] | 2350[747-3399] | 2006[889-3035] | 0.903 |
| PaO2/FiO2 | 168[103-210] | 96[74-178] | 97[65-152] | ***0.001*$*** |
| **Treatment** |  |  |  |  |
| ECMO | 10(19.2) | 15(26.8) | 2(5.9) | ***0.05#*** |
| Dialysis | 5(9.6) | 15(26.8) | 11(32.4) | ***0.023*$*** |
| Steroids | 26(50) | 44(78.6) | 28(82.4) | ***0.001*$*** |
| Anticoagulation | 50(96.2) | 54(96.4) | 34(100) | 0.521 |
| Hydroxychloroquine | 49(94.2) | 51(91.1) | 31(91.2) | 0.799 |
| Tocilizumab | 24(46.2) | 23(41.1) | 12(35.3) | 0.604 |
| **Antiviral** | 18(34.6) | 21(37.5) | 14(41.2) | 0.827 |
| Lopinavir/Ritonavir | 10(19.2) | 8(14.3) | 6(17.6) | 0.784 |
| Remdesivir | 5(9.6) | 8(14.3) | 2(5.9) | 0.436 |
| **Antibiotic** | 52(100) | 56(100) | 34(100) |  |
| Azithromycin | 48(92.3) | 47(83.9) | 28(82.4) | 0.311 |
| Vancomycin | 48(92.3) | 53(94.6) | 29(85.3) | 0.294 |
| Piperacillin/Tazobactam | 45(86.5) | 47(83.9) | 21(61.8) | ***0.012*#*** |
| Ceftriaxone | 37(71.2) | 40(71.4) | 19(55.9) | 0.246 |
| Cefepime | 14(26.9) | 22(39.3) | 11(32.4) | 0.392 |
| Amikacin | 14(26.9) | 23(41.1) | 18(52.9) | ***0.048**** |
| **Antifungal** | 32(61.5) | 48(85.7) | 27(79.4) | 0.012 |
| Micafungin | 22(42.3) | 37(66.1) | 25(73.5) | ***0.006*$*** |
| Fluconazole | 14(26.9) | 33(58.9) | 10(29.4) | ***0.001$#*** |
| **Respiratory Culture** | 51(98.1) | 56(100) | 33(97.1) | 0.478 |
| Positive Bacteria | 28(54.9) | 49(87.5) | 22(66.7) | ***0.001$#*** |
| Staphylococcus aureus | 11(21.6) | 12(21.4) | 5(15.2) | 0.728 |
| MRSA | 4(7.8) | 5(8.9) | 0(0) | 0.221 |
| Klebsiella pneumoniae | 2(3.9) | 8(14.3) | 2(6.1) | 0.135 |
| **Blood Culture** | 52(100) | 56(100) | 34(100) |  |
| Positive Bacteria | 7(13.5) | 17(30.4) | 9(26.5) | 0.101 |
| **Hospitalization Data** |  |  |  |  |
| Hospital Length of Stay | 40[33-47] | 60[53-82] | 34[23-53] | ***<0.001#$*** |
| ICU Admission Day | 2[1-3] | 2[0-4] | 3[1-6] | 0.413 |
| Sampling Day | 10[6-14] | 13[8-16] | 13[8-16] | 0.115 |
| ICU Length of Stay | 28[21-33] | 52[41-63] | 29[21-40] | ***<0.001#$*** |
| Intubation Day | 2[1-4] | 3[1-5] | 4[2-8] | 0.125 |
| Ventilator Days | 21[16-24] | 41[34-57] | 25[18-32] | ***<0.001#$*** |
| Average Follow-Up | 234[230-240] | 230[224-235] | - | ***0.004$*** |
| Days Between Death and ICU Admission | n.a. | n.a. | 30[22-47] |  |

Data expressed as n(%) or median[interquartile range].

p-values denotes chi square and Kruskal-Wallis for categorical and continuous variables, respectively.

MV = Invasive mechanical ventilation

AAM = African American

BMI =The body mass index is the weight in kilograms divided by the square of the height in meters.

CHF = congestive heart failure, CAD = coronary artery disease, CKD = chronic kidney disease, CVA = cerebrovascular accident

¥ Biomarkers calculated as median value day 1-14 after initiation of mechanical ventilation

IL- 6 = interleukin 6, WBC = white blood cell count, CRP = c-reactive protein, PaO2 = partial pressure of arterial oxygen, FiO2 = fraction inspired oxygen

ECMO = extra corporeal membrane oxygenation

Anticoagulation = Full dose anticoagulation with therapeutic anti-Xa level>0.3IU/ml and/or PTT>45 sec.

Respiratory Culture = defined as having any respiratory culture performed

Positive Bacteria = a culture resulting in any bacteria growth

MRSA = methicillin-resistant Staphylococcus aureus

Blood Culture = defined as having any blood culture performed

ICU Admission Day = the number of days between hospital admission and ICU admission

Sampling Day = the number of days between hospital admission and day of sample collection

Intubation Day = number of days between hospital admission and day of intubation

Ventilator Days = total number of days on mechanical ventilation

Average Follow-Up = number of days between hospital admission and the last day of active follow-up

n.a. = not applicable.

*Note.* * = significance between "≤28 days" and “Deceased", # = significance between ">28 days" and "Deceased", $ = significance between "≤28 days" and ">28 days"
