# Supplementary material for: Microbial signatures in the lower airways of mechanically ventilated COVID19 patients associated with poor clinical outcome
Source: Research Square preprint supplement (doi:10.21203/rs.3.rs-266050/v1), 2021-03-29
Supplement: Supplementary file 3 [file 8729b75a4fb6db35ceb029a3.xlsx]

## Sheet: Supp Table 1 Dem.Clin
Supplementary Table 1. Clinical Characteristics, Treatment, and Culture Results During Hospitalization
		NYU Sites			NYU Manhattan
	All	NYU Long Island	NYU Manhattan	p-value	No Bronchoscopy	Bronchoscopy	p-value
N	589	275(46.6)	314(53.4)		172(54.8)	142(45.2)
Age	65[56-72]	64[57-72]	65[56-72]	0.815	68[59-74]	62[48-70]	<0.001
Age Category				0.005			0.003
<51	98(16.6)	34(12.4)	64(20.4)		22(12.8)	42(29.6)
51-60	122(20.7)	71(25.8)	51(16.3)		28(16.3)	23(16.2)
61-70	193(32.8)	87(31.6)	106(33.8)		64(37.2)	42(29.6)
>70	176(29.9)	83(30.2)	93(29.5)		58(33.7)	35(24.6)
Sex(Male)	423(71.8)	186(67.6)	237(75.5)	0.033	126(73.3)	111(78.2)	0.314
Race				0.015			0.137
Caucasian	269(45.7)	120(43.7)	149(47.5)		82(47.7)	67(47.2)
Other	196(33.2)	88(32)	108(34.3)		53(30.8)	55(38.7)
African American	90(15.3)	52(18.9)	38(12)		27(15.7)	11(7.7)
Asian	34(5.8)	15(5.5)	19(6)		10(5.8)	9(6.3)
Ethnicity				0.312			0.661
Non Hispanic or Latino Origin	388(65.9)	174(63.3)	215(68.5)		117(68)	97(68.3)
Hispanic or Latino origin	138(23.4)	67(24.4)	71(22.6)		37(21.5)	34(23.9)
Unknown	63(10.7)	33(12)	26(8.3)		18(10.5)	11(7.7)
BMI	29[25-34]	30[26-36]	28[24-33]	0.002	29[25-35]	28[24-31]	0.033
BMI Category				0.05			0.008
<30	334(56.7)	141(51.3)	193(61.3)		93(54.1)	100(70.4)
≥30	251(42.6)	132(48)	119(38)		77(44.8)	42(29.6)
Comorbidities
Hyperlipidemia	154(26.1)	73(26.5)	81(25.7)	0.819	44(25.6)	37(26.1)	0.924
Hypertension	254(43.1)	113(41.1)	141(44.8)	0.369	72(41.9)	69(48.6)	0.233
COPD	21(3.6)	8(2.9)	13(4.1)	0.426	13(7.6)	0(0)	0.001
CHF	39(6.6)	12(4.4)	27(8.6)	0.04	19(11)	8(5.6)	0.089
CAD	71(12)	24(8.7)	47(14.9)	0.021	29(16.9)	18(12.7)	0.301
PVD	19(3.2)	7(2.5)	12(3.8)	0.386	9(5.2)	3(2.1)	0.151
Diabetes	179(30.3)	64(23.3)	115(36.5)	<0.001	61(35.5)	54(38)	0.639
Asthma	23(3.9)	12(4.4)	11(3.5)	0.585	9(5.2)	2(1.4)	0.067
CKD	78(13.2)	34(12.4)	44(14)	0.566	29(16.9)	15(10.6)	0.11
Leukemia/Lymphoma	49(8.3)	23(8.4)	26(8.3)	0.962	15(8.7)	11(7.7)	0.755
HIV/AIDS	7(1.2)	2(0.7)	5(1.6)	0.336	2(1.2)	3(2.1)	0.503
CVA	58(9.8)	13(4.7)	45(14.3)	<0.001	19(11)	26(18.3)	0.068
Smoking Status				0.123			0.041
Never	405(68.8)	184(66.9)	221(70.4)		110(64)	111(78.2)
Ex-Smoker	146(24.8)	78(28.4)	68(21.7)		44(25.6)	24(16.9)
Current	37(6.3)	13(4.7)	24(7.6)		17(9.9)	7(4.9)
Passive	1(0.2)	0(0)	1(0.3)		1(0.6)	0(0)
Outcomes
Alive				0.264			<0.001
≤28-day Vent	154(26.1)	64(66.7)	90(59.6)		38(22.1)	52(36.6)
>28-day Vent	93(15.8)	32(33.3)	61(40.4)		5(2.9)	56(39.4)
Deceased	342(58)	179(65.1)	163(51.7)	0.001	129(75)	34(23.9)	<0.001
Hospital Stay
Alive group	41[29-54]	36[17-54]	41[32-56]	0.03	30[16-41]	50[40-67]	<0.001
Deceased group	14[8-24]	13[7-23]	15[8-27]	0.175	12[7-20]	34[23-53]	<0.001
ICU Admission Day
Alive group	1[04]	1[0-3]	2[1-4]	0.016	1[0-4]	3[1-6]	0.05
Deceased group	2[0-4]	2[0-5]	2[0-4]	0.37	2[0-4]	2[1-4]	0.99
ICU Stay
Alive group	30[19-4]	29.5[12-48]	31[20-51]	0.257	14[7-24]	37[28-56]	<0.001
Deceased group	11[5-21]	10[5-20]	12[6-23]	0.073	10[5-16]	29[21-40]	<0.001
Intubation Day
Alive group	2[1-5]	2[1-6]	2[1-5]	0.979	2[0-4]	4[2-8]	0.003
Deceased group	2[1-5]	3[1-6]	2[0-4]	0.125	3[1-4]	2[1-5]	0.95
Ventilator Days
Alive group	23[10-38]	20[6-34.0]	25[15-40]	0.011	8[3-18]	29[21-41]	<0.001
Deceased group	9[4-17]	8[4-17]	11[4-17]	0.218	8[4-14]	25[18-32]	<0.001
Days Between Death and ICU Admission	14[8-24]	11[5-20]	15[8-27]	0.175	10[5-17]	30[22-47]	<0.001
Treatment
ECMO	49(8.3)	19(6.9)	30(9.5)	0.251	2(1.2)	27(19)	<0.001
Dialysis	155(26.3)	72(26.2)	83(26.3)	0.963	52(30.2)	31(21.8)	0.093
Steroids	315(53.4)	140(50.9)	175(55.6)	0.259	77(44.8)	98(69)	<0.001
Anticoagulation	508(86.2)	234(275)	274(87.3)	0.445	136(79.1)	138(97.2)	<0.001
Hydroxychloroquine	524(88.9)	245(89.1)	277(88.2)	0.749	146(84.9)	131(92.3)	0.044
Tocilizumab	229(38.9)	128(46.5)	101(32.2)	<0.001	42(24.4)	59(41.5)	0.001
Antiviral	118(20)	27(9.8)	91(29)	<0.001	38(22.1)	53(37.3)	0.003
Lopinavir/Ritonavir	62(10.5)	17(6.2)	45(14.3)	0.001	21(12.2)	24(16.9)	0.238
Valacyclovir	21(3.6)	1(0.4)	20(6.4)	<0.001	4(2.3)	16(11.3)	0.001
Valganciclovir	12(2)	0(0)	12(3.8)	0.001	3(1.7)	9(6.3)	0.035
Acyclovir	11(1.9)	4(1.5)	7(2.2)	0.587	2(1.2)	5(3.5)	0.159
Remdesivir	34(5.8)	5(1.8)	29(9.2)	<0.001	14(8.1)	15(10.6)	0.46
Ganciclovir	11(1.9)	0(0)	11(3.5)	0.002	1(0.6)	10(7)	0.002
Antibiotic	581(98.6)	267(97.1)	314(100)	0.002	172(100)	142(100)	-
Azithromycin	484(82.2)	225(81.8)	259(82.5)	0.833	136(79.1)	123(86.6)	0.08
Vancomycin	355(60.3)	105(38.2)	250(79.6)	<0.001	120(69.8)	130(91.5)	<0.001
Meropenem	323(54.8)	136(49.5)	187(59.6)	0.014	81(47.1)	106(74.6)	<0.001
Piperacillin/Tazobactam	303(51.4)	65(23.6)	238(75.8)	<0.001	125(72.7)	113(79.6)	0.155
Cefazolin	43(7.3)	26(9.5)	17(5.4)	0.06	7(4.1)	10(7)	0.247
Doxycycline	69(11.7)	43(15.6)	26(8.3)	0.006	13(7.6)	13(9.2)	0.609
Ceftriaxone	402(68.3)	206(74.9)	196(62.4)	0.001	100(58.1)	96(67.6)	0.085
Cefpodoxime	8(1.4)	0(0)	8(2.5)	0.008	3(1.7)	5(3.5)	0.32
Cefepime	158(26.8)	82(29.8)	76(24.2)	0.125	29(16.9)	47(33.1)	0.001
Ampicillin/Sulbactam	34(5.8)	6(2.2)	28(8.9)	<0.001	15(8.7)	13(9.2)	0.893
Metronidazole	39(6.6)	8(2.9)	31(9.9)	0.001	7(4.1)	24(16.9)	<0.001
Aztreonam	16(2.7)	2(0.7)	14(4.5)	0.005	4(2.3)	10(7)	0.044
Levofloxacin	54(9.2)	15(5.5)	39(12.4)	0.003	14(8.1)	25(17.6)	0.011
Linezolid	53(9)	4(1.5)	49(15.6)	<0.001	11(6.4)	38(26.8)	<0.001
Amikacin	96(16.3)	7(2.5)	89(28.3)	<0.001	34(19.8)	55(38.7)	<0.001
Tobramycin	24(4.1)	6(2.2)	18(5.7)	0.03	4(2.3)	14(9.9)	0.004
Sulfamethoxazole/Trimethoprim	44(7.5)	10(3.6)	34(10.8)	0.001	7(4.1)	27(19)	<0.001
Antifungal	279(47.3)	108(39.3)	171(54.5)	<0.001	64(37.2)	107(75.4)	<0.001
Micafungin	185(31.4)	56(20.4)	129(41.1)	<0.001	45(26.2)	84(59.2)	<0.001
Nystatin	136(23.1)	64(23.3)	72(22.9)	0.922	24(14)	48(33.8)	<0.001
Fluconazole	117(19.9)	39(14.2)	78(24.8)	0.001	21(12.2)	57(40.1)	<0.001
Miconazole	35(5.9)	28(10.2)	7(2.2)	<0.001	1(0.6)	6(4.2)	0.029
Respiratory Culture	408(69.3)	147(53.5)	261(83.1)	<0.001	121(70.3)	140(98.6)	<0.001
Positive Bacteria	246(60.3)	98(35.6)	148(47.1)	0.048	49(40.5)	99(70.7)	<0.001
Staphylococcus aureus	101(24.8)	55(37.4)	46(17.6)	<0.001	18(14.9)	28(20)	0.279
MRSA	47(11.5)	32(21.8)	15(5.7)	<0.001	6(5)	9(6.4)	0.611
Escherichia coli	32(7.8)	9(6.1)	23(8.8)	0.332	4(3.3)	19(13.6)	0.004
Klebsiella pneumoniae	32(7.8)	15(5.5)	17(5.4)	0.183	5(4.1)	12(8.6)	0.147
Serratia marcescens	15(3.7)	1(0.7)	14(5.4)	0.022	3(2.5)	11(7.9)	0.054
Stenotrophomonas maltophilia	19(4.7)	3(2)	16(6.1)	0.11	7(5.8)	9(6.4)	0.829
Other Positive Bacteria	153(37.5)	65(44.2)	88(33.7)	0.035	28(23.1)	60(42.9)	0.001
Positive Fungal	94(23)	52(35.4)	42(16.1)	<0.001	8(6.6)	34(24.3)	<0.001
Candida albicans	90(22)	52(35.4)	38(14.6)	<0.001	6(5)	32(22.9)	<0.001
Aspergillus fumigatus	4(1)	0(0)	4(1.5)	0.131	2(1.7)	2(1.4)	0.883
Oral flora	332(81.4)	94(63.9)	238(91.2)	<0.001	105(61)	133(93.7)	<0.001
Blood Culture	543(92.2)	234(85.1)	309(98.4)	<0.001	167(97.1)	142(100)	0.041
Positive Bacteria	97(17.9)	46(19.7)	51(16.5)	0.342	18(10.8)	33(23.2)	0.003
Staphylococcus aureus	17(3.1.)	11(4.7)	6(1.9)	0.068	2(1.2)	4(2.8)	0.304
MRSA	11(2)	8(3.4)	3(1)	0.045	0(0)	3(2.1)	0.059
Staphylococcus haemolyticus	12(2.2)	6(2.6)	6(1.9)	0.625	3(1.8)	3(2.1)	0.841
Serratia marcescens	5(.9)	2(.9)	3(1)	0.888	1(0.6)	2(1.4)	0.469
Other Positive Bacteria	73(13.4)	31(13.2)	42(13.6)	0.907	14(8.4)	28(19.7)	0.004
Candida albicans	9(1.7)	0(0)	9(2.9)	0.008	4(2.4)	5(3.5)	0.558
Data expressed as n(%) or median[interquartile range]
p-values denotes chi square and Kruskal-Wallis for categorical and continuous variables, respectively.
BMI = The body mass index is the weight in kilograms divided by the square of the height in meters.
<30 = BMI of less than 30 kg/m2
≥ 30 = BMI of greater than or equal to 30 kg/m2
COPD = chronic obstructive pulmonary disease
CHF = congestive heart failure
CAD = coronary artery disease
PVD = peripheral vascular diesease
CKD = chronic kidney disease
HIV/AIDS = human immunodeficiency virus, acquired immunodeficiency syndrome
CVA = cerebrovascular accident
≤28-day Vent = patients on mechanical ventilation for less than or equal to 28 days
>28-day Vent = patients on mechicanl ventilation for more than 28 days
Hospital Stay = length of hospitalization
ICU Admission Day = number of days between hospital admission and admission to the ICU
ICU Stay = length of ICU stay
Intubation Day = numbe of days between hospital admission and day of intubation
Ventilator Days = total number of days on mechanical ventilation
ECMO = extra corporeal membrane oxygenation
Anticoagulation = Full dose anticoagulation with therapeutic anti-Xa level>0.3IU/ml and/or PTT>45 sec.
Respiratory culture = defined as having any respiratory culture performed
Positive Bacteria = culture resulting in any bacteria growth
MRSA = methicillin-resistant Staphylococcus aureus
Other Positive Bacteria = growth of another bacteria species not listed
Positive Fungal = culture resulting in any fungal growth
Oral flora = Normal oropharyngeal flora
Blood Culture = defined as having any blood culture performed

## Sheet: Supp Table 2 Outcome
Supplementary Table 2. Comparison of Clinical Characteristics, Treatment, and Culture Results During Hospitalization
					NYU Sites								NYU Manhattan
	All				NYU Long Island				NYU Manhattan				No Bronchoscopy				Bronchoscopy
		Outcome				Outcome				Outcome				Outcome				Outcome
Variable	MV≤28 Days	MV>28 Days	Deceased	p-value	MV≤28 Days	MV>28 Days	Deceased	p-value	MV≤28 Days	MV>28 Days	Deceased	p-value	MV≤28 Days	MV>28 Days	Deceased	p-value	MV≤28 Days	MV>28 Days	Deceased	p-value
N	154(26.1)	93(15.8)	342(58.1)		64(23.3)	32(11.6)	179(65.1)		90(28.7)	61(19.4)	163(51.9)		38(22.1)	5(2.9)	129(75)		52(36.6)	56(39.4)	34(24)
Age	59[46-67]	60[50-68]	68[60-75]	<0.001#*	59[51-67]	59[53-64]	66[60-75]	<0.001*#	59[42-68]	64[48-71]	68[61-76]	<0.001*#	59[45-69]	58[44-69]	69[62-77]	<0.001*	59[38-67]	64[47-71]	64[56-72]	0.094
Age Category				<0.001#*				<0.001*#				<0.001*#				<0.001*				0.265
<51	47(30.5)	24(25.8)	27(7.9)		15(23.4)	6(18.8)	13(7.3)		32(35.6)	18(29.5)	14(8.6)		12(31.6)	1(20)	9(7)		20(38.5)	17(30.4)	5(14.7)
51-60	40(26)	23(24.7)	59(17.3)		22(34.4)	14(43.8)	35(19.6)		18(20)	9(14.8)	24(14.7)		10(26.3)	2(40)	16(12.4)		8(15.4)	7(12.5)	8(23.5)
61-70	43(27.9)	27(29)	123(36)		18(28.1)	9(28.1)	60(33.5)		25(27.8)	18(29.5)	63(38.7)		10(26.3)	1(20)	53(41.1)		15(28.8)	17(30.4)	10(29.4)
>70	24(15.6)	19(20.4)	133(38.9)		9(14.1)	3(9.4)	71(39.7)		15(16.7)	16(26.2)	62(38)		6(15.8)	1(20)	51(39.5)		9(17.3)	15(26.8)	11(32.4)
Sex(Male)	113(73.4)	65(69.9)	245(71.6)	0.835	47(73.4)	16(50)	123(68.7)	0.06	66(73.3)	49(80.3)	122(74.8)	0.596	26(68.4)	3(60)	97(75.2)	0.563	40(76.9)	46(82.1)	25(73.5)	0.608
Race				0.8				0.806				0.805				0.656				0.231
Caucasian	68(44.2)	41(44.1)	160(46.8)		29(45.3)	11(34.4)	80(44.7)		39(43.3)	30(49.2)	80(49.1)		14(36.8)	2(40)	66(51.2)		25(48.1)	28(50)	14(41.2)
Other	56(36.4)	32(34.4)	108(31.6)		21(32.8)	10(31.3)	57(31.8)		35(38.9)	22(36.1)	51(31.3)		13(34.2)	2(40)	38(29.5)		22(42.3)	20(35.7)	13(38.2)
African American	20(13)	13(14)	57(16.7)		10(15.6)	8(25)	34(19)		10(11.1)	5(8.2)	23(14.1)		9(23.7)	1(20)	17(13.2)		1(1.9)	4(7.1)	6(17.6)
Asian	10(6.5)	7(7.5)	17(5)		4(6.3)	3(9.4)	8(4.5)		6(6.7)	4(6.6)	9(5.5)		2(5.3)	0(0)	8(6.2)		4(7.7)	4(7.1)	1(2.9)
Ethnicity				0.563				0.45				0.432				0.578				0.117
Non Hispanic or Latino Origin	97(63)	65(69.9)	226(66.1)		37(57.8)	22(68.8)	115(64.2)		60(66.7)	43(70.5)	111(68.1)		26(68.4)	5(100)	86(66.7)		34(65.4)	38(67.9)	25(73.5)
Hispanic or Latino origin	40(26)	22(23.7)	76(22.2)		21(32.8)	6(18.8)	40(22.3)		19(21.1)	16(26.2)	36(22.1)		9(23.7)	0(0)	28(21.7)		10(19.2)	16(28.6)	8(23.5)
Unknown	17(11)	6(6.5)	40(11.7)		6(9.4)	4(12.5)	24(13.4)		11(12.2)	2(3.3)	16(9.8)		3(7.9)	0(0)	15(11.6)		8(15.4)	2(3.6)	1(2.9)
BMI	27[25-32]	27[24-32]	30[26-36]	<0.001#*	27[25-32]	30[26-35]	30[26-37]	0.011*	28[24-32]	26[23-30]	29[23-34]	0.017#	27[23-33]	36[21-42]	29[25-34]	0.344	29[25-32]	26[23-29]	29[25-33]	0.094
BMI Category				0.001#*				0.043*				0.02#$				0.789				0.045$
<30	97(63)	67(72)	170(49.7)		42(65.6)	19(59.4)	80(44.7)		55(61.1)	48(78.7)	90(55.2)		23(60.5)	2(40)	68(52.7)		32(61.5)	46(82.1)	22(64.7)
≥30	57(37)	26(28)	168(49.1)		22(34.4)	13(40.6)	97(54.2)		35(38.9)	13(21.3)	71(43.6)		15(39.5)	3(60)	59(45.7)		20(38.5)	10(17.9)	12(35.3)
Comorbidities
Hyperlipidemia	29(18.8)	29(31.2)	96(28.1)	0.046*$	12(18.8)	9(28.1)	52(29.1)	0.271	17(18.9)	20(32.8)	44(27)	0.141	6(15.8)	1(20)	37(28.7)	0.266	11(21.2)	19(33.9)	7(20.6)	0.226
Hypertension	67(43.5)	41(44.1)	146(42.7)	0.965	25(39.1)	16(50)	72(40.2)	0.545	42(46.7)	25(41)	74(45.4)	0.776	13(34.2)	2(40)	57(44.2)	0.547	29(55.8)	23(41.1)	17(50)	0.306
COPD	3(1.9)	1(1.1)	17(5)	0.09	1(1.6)	1(3.1)	6(3.4)	0.763	1(1.6)	1(3.1)	6(3.4)	0.044#	2(5.3)	0(0)	11(8.5)	0.648	0(0)	0(0)	0(0)	-
CHF	7(4.5)	4(4.3)	28(8.2)	0.198	2(3.1)	1(3.1)	9(5)	0.763	5(5.6)	3(4.9)	19(11.7)	0.132	3(7.9)	0(0)	16(12.4)	0.536	2(3.8)	3(5.4)	3(8.8)	0.615
CAD	15(9.7)	10(10.8)	46(13.5)	0.46	6(9.4)	2(6.3)	16(8.9)	0.865	9(10)	8(13.1)	30(18.4)	0.181	4(10.5)	0(0)	25(19.4)	0.261	5(9.6)	8(14.3)	5(14.7)	0.705
PVD	2(1.3)	3(3.2)	14(4.1)	0.265	1(1.6)	0(0)	6(3.4)	0.46	1(1.1)	3(4.9)	8(4.9)	0.283	1(2.6)	1(20)	7(5.4)	0.256	0(0)	2(3.6)	1(2.9)	0.404
Diabetes	46(29.9)	29(31.2)	104(30.4)	0.977	16(25)	5(15.6)	43(24)	0.546	30(33.3)	24(39.3)	61(37.4)	0.719	12(31.6)	1(20)	48(37.2)	0.624	18(34.6)	23(41.1)	13(38.2)	0.788
Asthma	7(4.5)	0(0)	16(4.7)	0.106	4(6.3)	0(0)	8(4.5)	0.366	3(3.3)	0(0)	8(4.9)	0.205	2(5.3)	0(0)	7(5.4)	0.867	1(1.9)	0(0)	1(2.9)	0.478
CKD	15(9.7)	8(8.6)	55(16.1)	0.055	6(9.4)	5(15.6)	23(12.8)	0.644	9(10)	3(4.9)	32(19.6)	0.008*#	5(13.2)	0(0)	24(18.6)	0.435	4(7.7)	3(5.4)	8(23.5)	0.017*#
Leukemia/Lymphoma	9(5.8)	6(6.5)	34(9.9)	0.241	5(7.8)	0(0)	18(10.1)	0.164	4(4.4)	6(9.8)	16(9.8)	0.295	3(7.9)	0(0)	12(9.3)	0.754	1(1.9)	6(10.7)	4(11.8)	0.14
HIV/AIDS	3(1.9)	1(1.1)	3(0.9)	0.592	2(3.1)	0(0)	0(0)	0.036*	1(1.1)	1(1.6)	3(1.8)	0.906	1(2.6)	0(0)	1(0.8)	0.625	0(0)	1(1.8)	2(5.9)	0.175
CVA	10(6.5)	11(11.8)	37(10.8)	0.256	2(3.1)	1(3.1)	10(5.6)	0.657	8(8.9)	10(16.4)	27(16.6)	0.218	5(13.2)	0(0)	14(10.9)	0.671	3(5.8)	10(17.9)	13(38.2)	0.001*#
Smoking Status				0.020*				0.516				0.037*				0.109				0.846
Never	119(77.3)	69(74.2)	217(63.5)		47(73.4)	22(68.8)	115(64.2)		72(80)	47(77)	102(62.6)		30(78.9)	4(80)	76(58.9)		42(80.8)	43(76.8)	26(76.5)
Ex-Smoker	29(18.8)	19(20.4)	98(28.7)		16(25)	9(28.1)	53(29.6)		13(14.4)	10(16.4)	45(27.6)		5(13.2)	1(20)	38(29.5)		8(15.4)	9(16.1)	7(20.6)
Current	5(3.2)	5(5.4)	27(7.9)		1(1.6)	1(3.1)	11(6.1)		4(4.4)	4(6.6)	16(9.8)		2(5.3)	0(0)	15(11.6)		2(3.8)	4(7.1)	1(2.9)
Passive	1(0.6)	0(0)	0(0)		0(0)	0(0)	0(0)		1(1.1)	0(0)	0(0)		1(2.6)	0(0)	0(0)		0(0)	0(0)	0(0)
Outcomes
Death	0(0)	0(0)	342(100)	<0.001*#	0(0)	0(0)	179(100)	<0.001*#	0(0)	0(0)	163(100)	<0.001*#	0(0)	0(0)	129(100)	<0.001#$	0(0)	0(0)	34(100)	<0.001#$
Hospital Length of Stay	34[19-42]	60[49-77]	14[8-25]	<0.001*#$	29[15-38]	57[44-70]	14[8-23]	<0.001*#$	37[24-43]	60[52-84]	16[8-27]	<0.001*#$	24[14-39]	86[38-90]	12[7-20]	<0.001*#	40[33-47]	60[53-82]	34[23-53]	<0.001#$
ICU Admission Day	2[0-3]	1[0-4]	2[0-4]	0.46	1[0-3]	1[0-2]	2[0-5]	0.042#	2[1-3]	2[0-4]	2[0-4]	0.814	2[0-4]	3[2-5]	1[0-4]	0.395	2[1-3]	2[0-4]	3[1-6]	0.413
ICU Length of Stay	22[11-30]	51[40-63]	11[5-21]	<0.001*#$	21[7-30]	48[37-57]	10[5-20]	<0.001*#$	23[13-30]	52[41-64]	12[6-23]	<0.001*#$	11[6-21]	63[25-73]	10[5-16]	0.002#$	28[21-33]	52[41-63]	29[21-40]	<0.001#$
Intubation Day	2[1-4]	2[1-5]	2[1-5]	0.979	2[1-7]	2[1-5]	3[1-6]	0.652	2[1-4]	3[1-5]	2[0-4]	0.519	2[1-4]	3[2-5]	2[0-4]	0.292	2[1-4]	3[1-5]	4[2-8]	0.125
Ventilator Days	156[7-22]	40[33-50]	10[4-18]	<0.001#$	10[4-20]	42[34-52]	9[4-17]	<0.001#$	18[9-23]	40[31-50]	11[5-19]	<0.001#$	7[3-13]	64[31-73]	8[3-14]	0.001#$	21[16-24]	41[34-57]	25[18-32]	<0.001#$
Days Between Death and ICU Admission	n.a.	n.a.	12[5-21]		n.a.	n.a.	11[5-20]		n.a.	n.a.	13[6-24]		n.a.	n.a.	10[5-17]		n.a.	n.a.	30[22-47]
Treatment
ECMO	21(13.6)	18(19.4)	9(2.6)	<0.001#*	9(14.1)	3(9.4)	7(3.9)	0.019*	12(13.3)	15(24.6)	2(1.2)	<0.001*#$	2(5.3)	0(0)	0(0)	0.028*	10(19.2)	15(26.8)	2(5.9)	0.05#
Dialysis	22(14.3)	25(26.9)	108(31.6)	<0.001*$	12(18.8)	8(25)	52(29.1)	0.271	10(11.1)	17(27.9)	56(34.4)	<0.001*$	5(13.2)	2(40)	45(34.9)	0.033	5(9.6)	15(26.8)	11(32.4)	0.023*$
Steroids	69(44.8)	69(74.2)	177(51.8)	<0.001#$	28(43.8)	21(65.6)	91(50.8)	0.13	41(45.6)	48(78.7)	86(52.8)	<0.001#$	15(39.5)	4(80)	58(45)	0.23	26(50)	44(78.6)	28(82.4)	0.001*$
Anticoagulation	132(85.7)	91(97.8)	285(83.3)	0.001#$	56(87.5)	32(100)	146(81.6)	0.022#$	76(84.4)	59(96.7)	139(85.3)	0.047#$	26(68.4)	5(100)	105(81.4)	0.114	50(96.2)	54(96.4)	34(100)	0.521
Hydroxychloroquine	134(87)	86(92.5)	302(88.3)	0.407	55(85.9)	30(93.8)	160(89.4)	0.5	79(87.8)	56(91.8)	142(87.1)	0.618	30(78.9)	5(100)	111(86)	0.355	49(94.2)	51(91.1)	31(91.2)	0.799
Tocilizumab	73(47.4)	45(48.4)	111(32.5)	0.001*#	37(57.8)	19(59.4)	72(40.2)	0.016*#	36(40)	26(42.6)	39(23.9)	0.005*#	12(31.6)	3(60)	27(20.9)	0.069	24(46.2)	23(41.1)	12(35.3)	0.604
Antiviral	36(23.4)	28(30.1)	54(15.8)	0.004*#	8(12.5)	2(6.3)	17(9.5)	0.606	28(31.1)	26(42.6)	37(22.7)	0.012#	10(26.3)	5(100)	23(17.8)	<0.001$#	18(34.6)	21(37.5)	14(41.2)	0.827
Lopinavir/Ritonavir	19(12.3)	9(9.7)	34(9.9)	0.694	3(4.7)	0(0)	14(7.8)	0.203	16(17.8)	9(14.8)	20(12.3)	0.486	6(15.8)	1(20)	14(10.9)	0.619	10(19.2)	8(14.3)	6(17.6)	0.784
Valacyclovir	7(4.5)	9(9.7)	5(1.5)	0.001#	1(1.6)	0(0)	0(0)	0.191	6(6.7)	9(14.8)	5(3.1)	0.006#	3(7.9)	0(0)	1(0.8)	0.036*	3(5.8)	9(16.1)	4(11.8)	0.238
Valganciclovir	5(3.2)	3(3.2)	4(1.2)	0.215	0(0)	0(0)	0(0)		5(5.6)	3(4.9)	4(2.5)	0.414	1(2.6)	0(0)	2(1.6)	0.864	4(7.7)	3(5.4)	2(5.9)	0.877
Acyclovir	2(1.3)	4(4.3)	5(1.5)	0.167	0(0)	2(6.3)	2(1.1)	0.045#$	2(2.2)	2(3.3)	3(1.8)	0.81	0(0)	0(0)	2(1.6)	0.714	2(3.8)	2(3.6)	1(2.9)	0.975
Remdesivir	12(7.8)	12(12.9)	10(2.9)	0.001*#	4(6.3)	0(0)	1(0.6)	0.01*	8(8.9)	12(19.7)	9(5.5)	0.005#	3(7.9)	4(80)	7(5.4)	<0.001$#	5(9.6)	8(14.3)	2(5.9)	0.436
Ganciclovir	2(1.3)	7(7.5)	2(0.6)	<0.001#$	0(0)	0(0)	0(0)		2(2.2)	7(11.5)	2(1.2)	0.001#$	0(0)	1(20)	0(0)	<0.001$#	2(3.8)	6(10.7)	2(5.9)	0.362
Antibiotic	152(98.7)	92(98.9)	337(98.5)	0.957	62(96.9)	31(96.9)	174(97.2)	0.988	90(100)	61(100)	163(100)		38(100)	5(100)	129(100)		52(100)	56(100)	34(100)
Azithromycin	126(81.8)	79(84.9)	279(81.6)	0.747	51(79.7)	29(90.6)	145(81)	0.378	75(83.3)	50(82)	134(82.2)	0.968	27(71.1)	3(60)	106(82.2)	0.19	48(92.3)	47(83.9)	28(82.4)	0.311
Vancomycin	94(61)	76(81.7)	185(54.1)	<0.001#$	24(37.5)	20(62.5)	61(34.1)	0.01#$	70(77.8)	56(91.8)	124(76.1)	0.03#$	22(57.9)	3(60)	95(73.6)	0.158	48(92.3)	53(94.6)	29(85.3)	0.294
Meropenem	72(46.8)	80(86)	171(50)	<0.001#$	32(50)	28(87.5)	76(42.5)	<0.001#$	40(44.4)	52(85.2)	95(58.3)	<0.001*#$	10(26.3)	5(100)	66(51.2)	0.001*$#	30(57.7)	47(83.9)	29(85.3)	0.002*$
Piperacillin/Tazobactam	84(54.5)	66(71)	153(44.7)	<0.001*#$	16(25)	14(43.8)	35(19.6)	0.012#	68(75.6)	52(85.2)	118(72.4)	0.135	23(60.5)	5(100)	97(75.2)	0.077	45(86.5)	47(83.9)	21(61.8)	0.012*#
Cefazolin	17(11)	10(10.8)	16(4.7)	0.016*#	10(15.6)	5(15.6)	11(6.1)	0.038*	7(7.8)	5(8.2)	5(3.1)	0.161	4(10.5)	0(0)	3(2.3)	0.072	3(5.8)	5(8.9)	2(5.9)	0.778
Doxycycline	21(13.6)	8(8.6)	40(11.7)	0.491	13(20.3)	2(6.3)	28(15.6)	0.202	8(8.9)	6(9.8)	12(7.4)	0.811	2(5.3)	1(20)	10(7.8)	0.496	6(11.5)	5(8.9)	2(5.9)	0.671
Ceftriaxone	106(68.8)	71(76.3)	225(65.8)	0.15	45(70.3)	26(81.3)	135(75.4)	0.489	61(67.8)	45(73.8)	90(55.2)	0.018#	24(63.2)	5(100)	71(55)	0.105	37(71.2)	40(71.4)	19(55.9)	0.246
Cefpodoxime	6(3.9)	2(2.2)	0(0)	0.002#	0(0)	0(0)	0(0)		6(6.7)	2(3.3)	0(0)	0.005#	3(7.9)	0(0)	0(0)	0.005*	3(5.8)	2(3.6)	0(0)	0.365
Cefepime	40(26)	43(46.2)	75(21.9)	<0.001#$	20(31.3)	19(59.4)	43(24)	<0.001#$	20(22.2)	24(39.3)	32(19.6)	0.008#$	6(15.8)	2(40)	21(16.3)	0.373	14(26.9)	22(39.3)	11(32.4)	0.392
Ampicillin/Sulbactam	8(5.2)	9(9.7)	17(5)	0.212	0(0)	1(3.1)	5(2.8)	0.392	8(8.9)	8(13.1)	12(7.4)	0.405	3(7.9)	1(20)	11(8.5)	0.658	5(9.6)	7(12.5)	1(2.9)	0.31
Metronidazole	12(7.8)	10(10.8)	17(5)	0.11	4(6.3)	1(3.1)	3(1.7)	0.174	8(8.9)	9(14.8)	14(8.6)	0.362	1(2.6)	1(20)	5(3.9)	0.177	7(13.5)	8(14.3)	9(26.5)	0.231
Aztreonam	2(1.3)	4(4.3)	10(2.9)	0.348	0(0)	1(3.1)	1(0.6)	0.214	2(2.2)	3(4.9)	9(5.5)	0.468	0(0)	0(0)	4(3.1)	0.505	2(3.8)	3(5.4)	5(14.7)	0.128
Levofloxacin	11(7.1)	21(22.6)	22(6.4)	<0.001#$	5(7.8)	6(18.8)	4(2.2)	<0.001*#	6(6.7)	15(24.6)	18(11)	0.003#$	0(0)	2(40)	12(9.3)	0.006$#	6(11.5)	13(23.2)	6(17.6)	0.282
Linezolid	12(7.8)	17(18.3)	24(7)	0.003#$	1(1.6)	2(6.3)	1(0.6)	0.046#	11(12.2)	15(24.6)	23(14.1)	0.091	1(2.6)	0(0)	10(7.8)	0.441	10(19.2)	15(26.8)	13(38.2)	0.15
Amikacin	22(14.3)	30(32.3)	44(12.9)	<0.001#$	3(4.7)	3(9.4)	1(0.6)	0.007*#	19(21.1)	27(44.3)	43(26.4)	0.006#$	5(13.2)	4(80)	25(19.4)	0.002$#	14(26.9)	23(41.1)	18(52.9)	0.048*
Tobramycin	4(2.6)	14(15.1)	6(1.8)	<0.001#$	3(4.7)	2(6.3)	1(0.6)	0.037*#	1(1.1)	12(19.7)	5(3.1)	<0.001#$	0(0)	1(20)	3(2.3)	0.02$	1(1.9)	11(19.6)	2(5.9)	0.006$
Sulfamethoxazole/Trimethoprim	9(5.8)	18(19.4)	17(5)	<0.001#$	2(3.1)	4(12.5)	4(2.2)	0.016#	7(7.8)	14(23)	13(8)	0.003#$	2(5.3)	1(20)	4(3.1)	0.157	5(9.6)	13(23.2)	9(26.5)	0.088
Antifungal	77(50)	81(87.1)	121(35.4)	<0.001*#$	32(50)	29(90.6)	47(26.3)	<0.001*#$	45(50)	52(85.2)	74(45.4)	<0.001#$	13(34.2)	4(80)	47(36.4)	0.129	32(61.5)	48(85.7)	27(79.4)	0.012
Micafungin	38(24.7)	54(58.1)	93(27.2)	<0.001#$	13(20.3)	13(40.6)	30(16.8)	0.009#$	25(27.8)	41(67.2)	63(38.7)	<0.001#$	3(7.9)	4(80)	38(29.5)	0.001*$#	22(42.3)	37(66.1)	25(73.5)	0.006*$
Nystatin	42(27.3)	49(52.7)	45(13.2)	<0.001*#$	21(32.8)	21(65.6)	22(12.3)	<0.001*#$	21(23.3)	28(45.9)	23(14.1)	<0.001#$	10(26.3)	2(40)	12(9.3)	0.007*#	11(21.2)	26(46.4)	11(32.4)	0.021$
Fluconazole	30(19.5)	48(51.6)	39(11.4)	<0.001*#$	11(17.2)	11(34.4)	17(9.5)	0.001#	19(21.1)	37(60.7)	22(13.5)	<0.001#$	5(13.2)	4(80)	12(9.3)	<0.001$#	14(26.9)	33(58.9)	10(29.4)	0.001$#
Miconazole	13(8.4)	18(19.4)	4(1.2)	<0.001#$	10(15.6)	15(46.9)	3(1.7)	<0.001*#$	3(3.3)	3(4.9)	1(0.6)	0.107	0(0)	0(0)	1(0.8)	0.846	3(5.8)	3(5.4)	0(0)	0.371
Respiratory Culture	111(72.1)	93(100)	204(59.6)	<0.001*#$	34(53.1)	32(100)	81(45.3)	<0.00#$	77(85.6)	61(100)	123(75.5)	<0.001#$	26(68.4)	5(100)	90(69.8)	0.334	51(98.1)	56(100)	33(97.1)	0.478
Positive Bacteria	60(54.1)	82(88.2)	104(51)	<0.001#$	21(61.8)	29(90.6)	48(59.3)	0.005$	39(50.6)	53(86.9)	56(45.5)	<0.001$	11(42.3)	4(80)	34(37.8)	0.17	28(54.9)	49(87.5)	22(66.7)	0.001$#
Staphylococcus aureus	27(24.3)	32(34.4)	42(20.6)	0.038#	9(26.5)	20(62.5)	26(32.1)	0.003#$	18(23.4)	12(19.7)	16(13)	0.154	7(26.9)	0(0)	11(12.2)	0.113	11(21.6)	12(21.4)	5(15.2)	0.728
MRSA	12(12.5)	19(21.1)	16(7.9)	0.006#	5(14.7)	14(43.8)	13(16)	0.003#$	7(11.3)	5(8.6)	3(2.5)	0.043*	3(11.5)	0(0)	3(3.3)	0.207	4(7.8)	5(8.9)	0(0)	0.221
Escherichia coli	6(5.4)	15(16.1)	11(5.4)	0.003#$	1(2.9)	4(12.5)	4(4.9)	0.216	5(6.5)	11(18)	7(5.7)	0.015#$	1(3.8)	1(20)	2(2.2)	0.095	4(7.8)	10(17.9)	5(15.2)	0.305
Klebsiella pneumoniae	11(9.9)	12(12.9)	9(4.4)	0.026*#	6(17.6)	4(12.5)	5(6.2)	0.159	5(6.5)	8(13.1)	4(3.3)	0.039#	3(11.5)	0(0)	2(2.2)	0.098	2(3.9)	8(14.3)	2(6.1)	0.135
Serratia marcescens	1(0.9)	8(8.6)	6(2.9)	0.011#$	0(0)	1(3.1)	0(0)	0.164	1(1.3)	7(11.5)	6(4.9)	0.029$	0(0)	1(20)	2(2.2)	0.03$#	1(2)	6(10.7)	4(12.1)	0.142
Stenotrophomonas maltophilia	1(0.9)	8(8.6)	6(2.9)	0.434	0(0)	1(3.1)	2(2.5)	0.615	3(3.9)	3(4.9)	10(8.1)	0.432	1(3.8)	0(0)	6(6.7)	0.735	2(3.9)	3(5.4)	4(12.1)	0.299
Other Positive Bacteria	39(35.1)	59(63.4)	55(27)	<0.001#$	18(52.9)	22(68.8)	25(30.9)	0.001*#	21(27.3)	37(60.7)	30(24.4)	<0.001#$	6(23.1)	3(60)	19(21.1)	0.133	15(29.4)	34(60.7)	11(33.3)	0.002$#
Positive Fungal	27(24.3)	27(29)	40(19.6)	0.188	15(44.1)	9(28.1)	28(34.6)	0.388	12(15.6)	18(29.5)	12(9.8)	0.003$	1(3.8)	1(20)	6(6.7)	0.412	11(21.6)	17(30.4)	6(18.2)	0.369
Candida albicans	26(23.4)	26(28)	38(18.6)	0.183	15(44.1)	9(28.1)	28(34.6)	0.388	11(14.3)	17(27.9)	10(8.1)	0.002#$	1(3.8)	1(20)	4(4.4)	0.284	10(19.6)	16(28.6)	6(18.2)	0.417
Aspergillus fumigatus	1(0.9)	1(1.1)	2(0.6)	0.922	0(0)	0(0)	0(0)		1(1.3)	1(1.6)	2(1.6)	0.98	0(0)	0(0)	2(2.3)	0.705	1(2)	1(1.8)	0(0)	0.729
Oral flora	90(81.1)	86(92.5)	156(76.5)	0.005#$	21(61.8)	26(81.3)	47(58)	0.065	69(89.6)	60(98.4)	109(88.6)	0.076	22(57.9)	5(100)	78(60.5)	0.186	47(90.4)	55(98.2)	31(91.2)	0.197
Blood Culture	141(91.6)	92(98.9)	310(90.6)	0.029#$	54(84.4)	31(96.9)	149(83.2)	0.135	87(96.7)	61(100)	161(98.8)	0.239	35(92.1)	5(100)	127(98.4)	0.114	52(100)	56(100)	34(100)
Positive Bacteria	23(16.3)	31(33.7)	43(13.9)	<0.001#$	11(20.4)	14(45.2)	21(14.1)	<0.001#$	12(13.8)	17(27.9)	22(13.7)	0.028#$	5(14.3)	0(0)	13(10.2)	0.58	7(13.5)	17(30.4)	9(26.5)	0.101
Staphylococcus aureus	2(1.4)	5(5.4)	10(3.2)	0.225	0(0)	3(9.7)	8(5.4)	0.104	2(2.3)	2(3.3)	2(1.2)	0.593	0(0)	0(0)	2(1.6)	0.727	2(3.8)	2(3.6)	0(0)	0.521
MRSA	2(1.4)	4(4.3)	5(1.6)	0.22	0(0)	3(9.7)	5(3.4)	0.061	2(2.3)	1(1.6)	0(0)	0.177	0(0)	0(0)	0(0)		2(3.8)	1(1.8)	0(0)	0.468
Staphylococcus haemolyticus	4(2.8)	5(5.4)	3(1)	0.032#	2(3.7)	3(9.7)	1(0.7)	0.013#	2(2.3)	2(3.3)	2(1.2)	0.593	1(2.9)	0(0)	2(1.6)	0.839	1(1.9)	2(3.6)	0(0)	0.517
Serratia marcescens	0(0)	3(3.3)	2(0.6)	0.029#$	0(0)	2(6.5)	0(0)	0.001#$	0(0)	1(1.6)	2(1.2)	0.533	0(0)	0(0)	1(0.8)	0.853	0(0)	1(1.8)	1(2.9)	0.503
Other Positive Bacteria	19(13.5)	22(23.9)	32(10.3)	0.004#$	9(16.7)	8(25.8)	14(9.4)	0.035#	10(11.5)	14(23)	18(11.2)	0.059	4(11.4)	0(0)	10(7.9)	0.63	6(11.5)	14(25)	8(23.5)	0.174
Candida albicans	3(2.1)	1(1.1)	5(1.6)	0.827	0(0)	0(0)	0(0)		3(3.4)	1(1.6)	5(3.1)	0.795	1(2.9)	0(0)	3(2.4)	0.925	2(3.8)	1(1.8)	2(5.9)	0.585
Note. * = significance between "≤28 days" and “Deceased", # = significance between ">28 days" and "Deceased", $ = significance between "≤28 days" and ">28 days"
Data expressed as n(%) or median[interquartile range]
p-values denotes chi square and Kruskal-Wallis for categorical and continuous variables, respectively.
MV= Invasive Mechanical Ventilation
BMI = The body mass index is the weight in kilograms divided by the square of the height in meters.
<30 = BMI of less than 30 kg/m2
≥ 30 = BMI of greater than or equal to 30 kg/m2
COPD = chronic obstructive pulmonary disease
CHF = congestive heart failure
CAD = coronary artery disease
PVD = peripheral vascular diesease
CKD = chronic kidney disease
HIV/AIDS = human immunodeficiency virus, acquired immunodeficiency syndrome
CVA = cerebrovascular accident
ICU Admission Day = number of days between hospital admission and admission to the ICU
Intubation Day = numbe of days between hospital admission and day of intubation
Ventilator Days = total number of days on mechanical ventilation
ECMO = extra corporeal membrane oxygenation
Anticoagulation = Full dose anticoagulation with therapeutic anti-Xa level>0.3IU/ml and/or PTT>45 sec.
Respiratory culture = defined as having any respiratory culture performed
Positive Bacteria = culture resulting in any bacteria growth
MRSA = methicillin-resistant Staphylococcus aureus
Other Positive Bacteria = growth of another bacteria species not listed
Positive Fungal = culture resulting in any fungal growth
Oral flora = normal oropharyngeal flora
Blood Culture = defined as having any blood culture performed
n.a. = not applicable

## Sheet: Sup Table 3- Week 2
Supplementary Table 3. Comparison of Treatment and Culture results during the first 2 weeks of hospitalization
					NYU Sites								NYU Manhattan
	All				NYU Long Island				NYU Manhattan				No Bronchoscopy				Bronchoscopy
		Outcome				Outcome				Outcome				Outcome				Outcome
Variable	MV≤28 Days	MV>28 Days	Deceased	p-value	MV≤28 Days	MV>28 Days	Deceased	p-value	MV≤28 Days	MV>28 Days	Deceased	p-value	MV≤28 Days	MV>28 Days	Deceased	p-value	MV≤28 Days	MV>28 Days	Deceased	p-value
N	154(26.1)	93(15.8)	342(58.1)		64(23.3)	32(11.6)	179(65.1)		90(28.7)	61(19.4)	163(51.9)		38(22.1)	5(2.9)	129(75)		52(36.6)	56(39.4)	34(24)
Treatment
ECMO	19(12.3)	15(16.1)	9(2.6)	<0.001*#	8(12.5)	2(6.3)	7(3.9)	0.05	11(12.2)	13(21.3)	2(1.2)	<0.001*#	2(5.3)	0(0)	0(0)	0.028*	9(17.3)	13(23.2)	2(5.9)	0.104
Dialysis	19(12.3)	19(20.4)	89(26)	0.003#	10(15.6)	6(18.8)	42(23.5)	0.395	9(10)	13(21.3)	47(28.8)	0.002*$	4(10.5)	0(0)	40(31)	0.016*	5(9.6)	13(23.2)	7(20.6)	0.156
Steroids	54(35.1)	44(47.3)	155(45.3)	0.067	22(34.4)	14(43.8)	83(46.4)	0.251	32(35.6)	30(49.2)	72(44.2)	0.216	11(28.9)	3(60)	53(41.1)	0.249	21(40.4)	27(48.2)	19(55.9)	0.364
Anticoagulation	75(48.7)	41(44.1)	263(76.9)	<0.001*#	37(57.8)	16(50)	136(76)	0.001*#	38(42.2)	25(41)	127(77.9)	<0.001*#	20(52.6)	2(40)	100(77.5)	0.004*	18(34.6)	23(41.1)	27(79.4)	<0.001*#
Hydroxychloroquine	134(87)	86(92.5)	301(88)	0.397	55(85.9)	30(93.8)	160(89.4)	0.5	79(87.8)	56(91.8)	141(86.5)	0.556	30(78.9)	5(100)	110(85.3)	0.397	49(94.2)	51(91.1)	31(91.2)	0.799
Tocilizumab	71(46.1)	44(47.3)	106(31)	0.001*#	35(54.7)	19(59.4)	69(38.5)	0.017*#	36(40)	25(41)	37(22.7)	0.003*#	12(31.6)	3(60)	25(19.4)	0.042#	24(46.2)	22(39.3)	12(35.3)	0.578
Antiviral	29(18.8)	12(12.9)	50(14.6)	0.37	6(9.4)	1(3.1)	17(9.5)	0.49	23(25.6)	11(18)	33(20.2)	0.48	9(23.7)	2(40)	22(17.1)	0.321	14(26.9)	9(16.1)	11(32.4)	0.176
Lopinavir/Ritonavir	19(12.3)	9(9.7)	34(9.9)	0.694	3(4.7)	0(0)	14(7.8)	0.203	16(17.8)	9(14.8)	20(12.3)	0.486	6(15.8)	1(20)	14(10.9)	0.619	10(19.2)	8(14.3)	6(17.6)	0.784
Valacyclovir	2(1.3)	1(1.1)	5(1.5)	0.957	0(0)	0(0)	0(0)		2(2.2)	1(1.6)	5(3.1)	0.811	1(2.6)	0(0)	1(0.8)	0.625	1(1.9)	1(1.8)	4(11.8)	0.043#
Valganciclovir	0(0)	0(0)	1(0.3)	0.696	0(0)	0(0)	0(0)		0(0)	0(0)	1(0.6)	0.628	0(0)	0(0)	1(0.8)	0.846	0(0)	0(0)	0(0)
Acyclovir	1(0.6)	1(1.1)	5(1.5)	0.737	0(0)	1(3.1)	2(1.1)	0.38	1(1.1)	0(0)	3(1.8)	0.543	0(0)	0(0)	2(1.6)	0.714	1(1.9)	0(0)	1(2.9)	0.478
Remdesivir	10(6.5)	2(2.2)	9(2.6)	0.072	3(4.7)	0(0)	1(0.6)	0.046*	7(7.8)	2(3.3)	8(4.9)	0.448	3(7.9)	1(20)	6(4.7)	0.293	4(7.7)	1(1.8)	2(5.9)	0.351
Ganciclovir	0(0)	0(0)	0(0)		0(0)	0(0)	0(0)		0(0)	0(0)	0(0)		0(0)	0(0)	0(0)		0(0)	0(0)	0(0)
Antibiotic	149(96.8)	91(97.8)	337(98.5)	0.427	61(95.3)	31(96.9)	174(97.2)	0.765	88(97.8)	60(98.4)	163(100)	0.183	36(94.7)	5(100)	129(100)	0.028*	52(100)	55(98.2)	34(100)	0.461
Azithromycin	126(81.8)	78(83.9)	278(81.3)	0.849	51(79.7)	29(90.6)	145(81)	0.378	75(83.3)	49(80.3)	133(81.6)	0.889	27(71.1)	3(60)	105(81.4)	0.234	48(92.3)	46(82.1)	28(82.4)	0.25
Vancomycin	78(50.6)	65(69.9)	168(49.1)	0.001	16(25)	16(50)	49(27.4)	0.024#	62(68.9)	49(80.3)	119(73)	0.296	21(55.3)	3(60)	94(72.9)	0.111	41(78.8)	46(82.1)	25(73.5)	0.624
Meropenem	40(26)	46(49.5)	120(35.1)	0.001*#$	17(26.6)	17(53.1)	51(28.5)	0.015#$	23(25.6)	29(47.5)	69(42.3)	0.009$	7(18.4)	4(80)	55(42.6)	0.004*$	16(30.8)	25(44.6)	14(41.2)	0.317
Piperacillin/Tazobactam	69(44.8)	50(53.8)	137(40.1)	0.057	10(15.6)	3(9.4)	25(14)	0.701	59(65.6)	47(77)	112(68.7)	0.31	19(50)	5(100)	94(72.9)	0.009*$	40(76.9)	42(75)	18(52.9)	0.037*#
Cefazolin	9(5.8)	3(3.2)	9(2.6)	0.199	6(9.4)	1(3.1)	6(3.4)	0.135	3(3.3)	2(3.3)	3(1.8)	0.711	2(5.3)	0(0)	2(1.6)	0.386	1(1.9)	2(3.6)	1(2.9)	0.874
Doxycycline	18(11.7)	6(6.5)	39(11.4)	0.351	12(18.8)	1(3.1)	28(15.6)	0.115	6(6.7)	5(8.2)	11(6.7)	0.921	2(5.3)	1(20)	10(7.8)	0.496	4(7.7)	4(7.1)	1(2.9)	0.643
Ceftriaxone	94(61)	62(66.7)	217(63.5)	0.672	43(67.2)	23(71.9)	130(72.6)	0.709	51(56.7)	39(63.9)	87(53.4)	0.365	21(55.3)	4(80)	69(53.5)	0.503	30(57.7)	35(62.5)	18(52.9)	0.665
Cefpodoxime	0(0)	0(0)	0(0)		0(0)	0(0)	0(0)		0(0)	0(0)	0(0)		0(0)	0(0)	0(0)		0(0)	0(0)	0(0)
Cefepime	17(11)	21(22.6)	59(17.3)	0.05	7(10.9)	9(28.1)	33(18.4)	0.109	10(11.1)	12(19.7)	26(16)	0.337	5(13.2)	1(20)	18(14)	0.917	5(9.6)	11(19.6)	8(23.5)	0.189
Ampicillin/Sulbactam	6(3.9)	4(4.3)	14(4.1)	0.988	0(0)	0(0)	3(1.7)	0.443	6(6.7)	4(6.6)	11(6.7)	0.999	2(5.3)	1(20)	11(8.5)	0.5	4(7.7)	3(5.4)	0(0)	0.268
Metronidazole	5(3.2)	2(2.2)	9(2.6)	0.867	0(0)	0(0)	1(0.6)	0.764	5(5.6)	2(3.3)	8(4.9)	0.808	0(0)	0(0)	3(2.3)	0.601	5(9.6)	2(3.6)	5(14.7)	0.171
Aztreonam	2(1.3)	1(1.1)	7(2)	0.736	0(0)	0(0)	1(0.6)	0.764	2(2.2)	1(1.6)	6(3.7)	0.653	0(0)	0(0)	4(3.1)	0.505	2(3.8)	1(1.8)	2(5.9)	0.585
Levofloxacin	4(2.6)	1(1.1)	9(2.6)	0.668	3(4.7)	0(0)	1(0.6)	0.046*	1(1.1)	1(1.6)	8(4.9)	0.192	0(0)	0(0)	6(4.7)	0.355	1(1.9)	1(1.8)	2(5.9)	0.464
Linezolid	3(1.9)	3(3.2)	11(3.2)	0.721	0(0)	0(0)	0(0)		3(3.3)	3(4.9)	11(6.7)	0.507	0(0)	0(0)	8(6.2)	0.247	3(5.8)	3(5.4)	3(8.8)	0.789
Amikacin	7(4.5)	7(7.5)	26(7.6)	0.436	0(0)	0(0)	0(0)		7(7.8)	7(11.5)	26(16)	0.166	2(5.3)	1(20)	21(16.3)	0.21	5(9.6)	6(10.7)	5(14.7)	0.755
Tobramycin	0(0)	1(1.1)	2(0.6)	0.493	0(0)	0(0)	0(0)		0(0)	1(1.6)	2(1.2)	0.523	0(0)	0(0)	2(1.6)	0.714	0(0)	1(1.8)	0(0)	0.461
Sulfamethoxazole/Trimethoprim	3(1.9)	2(2.2)	10(2.9)	0.788	0(0)	1(3.1)	3(1.7)	0.443	3(3.3)	1(1.6)	7(4.3)	0.626	1(2.6)	0(0)	1(0.8)	0.625	2(3.8)	1(1.8)	6(17.6)	0.007*#
Antifungal	31(20.1)	22(23.7)	58(17)	0.306	9(14.1)	4(12.5)	17(9.5)	0.575	22(24.4)	18(29.5)	41(25.2)	0.756	11(28.9)	2(40)	30(23.3)	0.57	11(21.2)	16(28.6)	11(32.4)	0.479
Micafungin	6(3.9)	13(14)	35(10.2)	0.017*$	0(0)	2(6.3)	3(1.7)	0.094	6(6.7)	11(18)	32(19.6)	0.021*	2(5.3)	2(40)	24(18.6)	0.051	4(7.7)	9(16.1)	8(23.5)	0.122
Nystatin	21(13.6)	10(10.8)	20(5.8)	0.013*	9(14.1)	3(9.4)	9(5)	0.06	12(13.3)	7(11.5)	11(6.7)	0.199	7(18.4)	0(0)	6(4.7)	0.015*	5(9.6)	7(12.5)	5(14.7)	0.767
Fluconazole	5(3.2)	4(4.3)	11(3.2)	0.871	0(0)	0(0)	5(2.8)	0.255	5(5.6)	4(6.6)	6(3.7)	0.614	3(7.9)	0(0)	6(4.7)	0.635	2(3.8)	4(7.1)	0(0)	0.26
Miconazole	1(0.6)	2(2.2)	2(0.6)	0.328	0(0)	1(3.1)	1(0.6)	0.214	1(1.1)	1(1.6)	1(0.6)	0.769	0(0)	0(0)	1(0.8)	0.846	1(1.9)	1(1.8)	0(0)	0.725
Respiratory Culture	76(49.4)	64(68.8)	159(46.5)	0.001#$	16(25)	17(53.1)	56(31.3)	0.018#$	60(66.7)	47(77)	103(63.2)	0.146	23(60.5)	5(100)	84(65.1)	0.22	37(71.2)	42(75)	19(55.9)	0.15
Positive Bacteria	25(32.9)	26(40.6)	59(37.1)	0.635	6(37.5)	8(47.1)	25(44.6)	0.841	19(31.7)	18(38.3)	34(33)	0.75	8(34.8)	1(20)	26(31)	0.806	11(29.7)	17(40.5)	8(42.1)	0.53
Staphylococcus aureus	9(11.8)	15(23.4)	26(16.4)	0.184	1(6.3)	5(29.4)	14(25)	0.213	8(13.3)	10(21.3)	12(11.7)	0.286	4(17.4)	0(0)	10(11.9)	0.537	4(10.8)	10(23.8)	2(10.5)	0.222
MRSA	4(5.3)	7(10.9)	11(6.9)	0.419	0(0)	3(17.6)	9(16.1)	0.216	4(6.7)	4(8.5)	2(1.9)	0.154	2(8.7)	0(0)	2(2.4)	0.319	2(5.4)	4(9.5)	0(0)	0.347
Escherichia coli	0(0)	2(3.1)	6(3.8)	0.238	0(0)	0(0)	2(3.6)	0.547	0(0)	2(4.3)	4(3.9)	0.288	0(0)	0(0)	2(2.4)	0.712	0(0)	2(4.8)	2(10.5)	0.162
Klebsiella pneumoniae	5(6.6)	3(4.7)	4(2.5)	0.317	3(18.8)	1(5.9)	2(3.6)	0.101	2(3.3)	2(4.3)	2(1.9)	0.708	1(4.3)	0(0)	2(2.4)	0.814	1(2.7)	2(4.8)	0(0)	0.599
Serratia marcescens	0(0)	4(6.3)	1(0.6)	0.005#$	0(0)	0(0)	0(0)		0(0)	4(8.5)	1(1)	0.007$	0(0)	1(20)	1(1.2)	0.007#$	0(0)	3(7.1)	0(0)	0.127
Stenotrophomonas maltophilia	2(2.6)	1(1.6)	7(4.4)	0.522	0(0)	0(0)	1(1.8)	0.742	2(3.3)	1(2.1)	6(5.8)	0.532	0(0)	0(0)	5(6)	0.418	2(5.4)	1(2.4)	1(5.3)	0.762
Other Positive Bacteria	13(17.1)	8(12.5)	27(17)	0.683	5(31.3)	4(23.5)	10(17.9)	0.499	8(13.3)	4(8.5)	17(16.5)	0.417	3(13)	0(0)	13(15.5)	0.619	5(13.5)	4(9.5)	4(21.1)	0.469
Positive Fungal	12(15.8)	12(18.8)	23(14.5)	0.729	6(37.5)	6(35.3)	18(32.1)	0.912	6(10)	6(12.8)	5(4.9)	0.21	1(4.3)	1(20)	4(4.8)	0.33	5(13.5)	5(11.9)	1(5.3)	0.64
Candida albicans	11(14.5)	12(18.8)	21(13.2)	0.571	6(37.5)	6(35.3)	18(32.1)	0.912	5(8.3)	6(12.8)	3(2.9)	0.067	1(4.3)	1(20)	2(2.4)	0.116	4(10.8)	5(11.9)	1(5.3)	0.721
Aspergillus fumigatus	1(1.3)	0(0)	2(1.3)	0.661	0(0)	0(0)	0(0)	-	1(1.7)	0(0)	2(1.9)	0.638	0(0)	0(0)	2(2.4)	0.712	1(2.7)	0(0)	0(0)	0.435
Oral flora	74(48.1)	59(63.4)	120(35.1)	<0.001*#$	11(17.2)	13(40.6)	30(16.8)	0.006#$	63(70)	46(75.4)	90(55.2)	0.006*	22(57.9)	4(80)	69(53.5)	0.47	41(78.8)	42(75)	21(61.8)	0.201
Blood Culture	125(81.2)	84(90.3)	298(87.1)	0.09	47(73.4)	27(84.4)	138(77.1)	0.486	78(86.7)	57(93.4)	160(98.2)	0.001*	32(84.2)	5(100)	127(98.4)	0.001*	46(88.5)	52(92.9)	33(97.1)	0.337
Positive Bacteria	11(8.8)	8(9.5)	25(8.4)	0.947	3(6.4)	2(7.4)	11(8)	0.938	8(10.3)	6(10.5)	14(8.8)	0.893	3(9.4)	0(0)	11(8.7)	0.78	5(10.9)	6(11.5)	3(9.1)	0.937
Staphylococcus aureus	1(0.8)	1(1.2)	7(2.3)	0.494	0(0)	0(0)	5(3.6)	0.253	1(1.3)	1(1.8)	2(1.3)	0.959	0(0)	0(0)	2(1.6)	0.745	1(2.2)	1(1.9)	0(0)	0.707
MRSA	1(0.8)	0(0)	4(1.3)	0.53	0(0)	0(0)	4(2.9)	0.335	1(1.3)	0(0)	0(0)	0.248	0(0)	0(0)	0(0)		1(2.2)	0(0)	0(0)	0.394
Staphylococcus haemolyticus	2(1.6)	2(2.4)	2(0.7)	0.39	1(2.1)	1(3.7)	0(0)	0.121	1(1.3)	1(1.8)	2(1.3)	0.959	0(0)	0(0)	2(1.6)	0.745	1(2.2)	1(1.9)	0(0)	0.707
Serratia marcescens	0(0)	0(0)	0(0)		0(0)	0(0)	0(0)		0(0)	0(0)	0(0)		0(0)	0(0)	0(0)		0(0)	0(0)	0(0)
Other Positive Bacteria	9(7.2)	6(7.1)	18(6)	0.878	2(4.3)	2(7.4)	6(4.3)	0.779	7(9)	4(7)	12(7.5)	0.897	3(9.4)	0(0)	9(7.1)	0.739	4(8.7)	4(7.7)	3(9.1)	0.971
Candida albicans	2(1.6)	0(0)	3(1)	0.517	0(0)	0(0)	0(0)		2(2.6)	0(0)	3(1.9)	0.505	1(3.1)	0(0)	2(1.6)	0.803	1(2.2)	0(0)	1(3)	0.489
Note. * = significance between "≤28 days" and “Deceased", # = significance between ">28 days" and "Deceased", $ = significance between "≤28 days" and ">28 days"
Data expressed as n(%) or median[interquartile range]
p-values denotes chi square and Kruskal-Wallis for categorical and continuous variables, respectively.
MV= Invasive Mechanical Ventilation
ECMO = extra corporeal membrane oxygenation
Anticoagulation = Full dose anticoagulation with therapeutic anti-Xa level>0.3IU/ml and/or PTT>45 sec.
Respiratory culture = defined as having any respiratory culture performed
Positive Bacteria = a culture resulting in any bacteria growth
MRSA = methicillin-resistant Staphylococcus aureus
Other Positive Bacteria = growth of another bacteria species not listed
Positive Fungal = culture resulting in any fungal growth
Oral flora = Normal oropharyngeal flora
Blood Culture = defined as having any blood culture performed

## Sheet: SuppTable 4 relab_ranking
Supplementary Table 4. Ranking of relative abundances based on Metagenome and Metatranscriptome data in BAL and upper airways
Organism	Category	probable_metagenome_contaminant	probable_metatranscriptome_contaminant	BAL metagenome	UA metagenome	BAL metatranscriptome	UA metatranscriptome
Staphylococcus epidermidis	bacteria	FALSE	FALSE	38	3	1	1
Proteus virus Isfahan	virus_DNAbacteria	FALSE	FALSE	159	335	2	11
Staphylococcus aureus	bacteria	FALSE	FALSE	1	1	3	3
Mycoplasma salivarium	bacteria	FALSE	FALSE	100	14	4	2
Candida albicans	fungi	FALSE	FALSE	77	86	5	8
Escherichia coli	bacteria	FALSE	TRUE	13	21	6	36
Severe acute respiratory syndrome-related coronavirus	virus_RNAvertebrates	TRUE	FALSE	6929.5	7207	7	24
Bacillus thuringiensis	bacteria	TRUE	FALSE	51	85	8	61
Equine infectious anemia virus	virus_RNAvertebrates	TRUE	TRUE	NA	NA	9	51
Finegoldia magna	bacteria	TRUE	FALSE	327	75	10	12
Streptococcus pyogenes	bacteria	FALSE	TRUE	59	64	11	15
Achromobacter xylosoxidans	bacteria	TRUE	TRUE	163	465	12	60
Salmonella enterica	bacteria	FALSE	TRUE	2	2	13	69
Streptococcus anginosus	bacteria	FALSE	FALSE	469	48	14	25
Prevotella oris	bacteria	FALSE	FALSE	147	12	15	6
Stenotrophomonas maltophilia	bacteria	TRUE	TRUE	217	304	16	88
Staphylococcus haemolyticus	bacteria	TRUE	FALSE	216	50	17	5
Lactobacillus gasseri	bacteria	TRUE	FALSE	567	266	18	40
Enterococcus faecalis	bacteria	FALSE	FALSE	154	146	19	14
Bacillus cereus	bacteria	TRUE	TRUE	60	67	20	35
Prevotella melaninogenica	bacteria	FALSE	FALSE	176	9	21	13
Staphylococcus hominis	bacteria	TRUE	FALSE	205	63	22	4
Delftia acidovorans	bacteria	TRUE	TRUE	644	1488	23	127
Streptococcus oralis	bacteria	TRUE	FALSE	243	61	24	37
Bacillus megaterium	bacteria	TRUE	FALSE	99	208	25	205
Streptococcus intermedius	bacteria	FALSE	FALSE	909	90	26	50
Parvimonas micra	bacteria	FALSE	FALSE	277	74	27	43
Klebsiella pneumoniae	bacteria	TRUE	TRUE	7	6	28	157
Debaryomyces hansenii	fungi	FALSE	FALSE	346	410	29	57
Xanthomonas euvesicatoria	bacteria	FALSE	TRUE	2862	4379	30	148
Streptococcus milleri	bacteria	FALSE	FALSE	2515	113	31	47
Thermotoga maritima	bacteria	TRUE	TRUE	6929.5	7207	32	117
Cutibacterium acnes	bacteria	TRUE	TRUE	152	93	33	132
Delftia tsuruhatensis	bacteria	TRUE	TRUE	1356	3026	34	164
Lacticaseibacillus rhamnosus	bacteria	TRUE	FALSE	1547	238	35	58
Lactobacillus paragasseri	bacteria	FALSE	FALSE	1342	449	36	97
Enterococcus faecium	bacteria	FALSE	FALSE	12	18	37	22
Candida dubliniensis	fungi	FALSE	FALSE	47	66	38	86
Pasteurella multocida	bacteria	FALSE	FALSE	89	161	39	409
Fusobacterium nucleatum	bacteria	FALSE	FALSE	122	125	40	74
Streptococcus sp. KS 6	bacteria	FALSE	FALSE	3632	209	41	73
Lancefieldella parvula	bacteria	FALSE	FALSE	1221	32	42	29
Malassezia restricta	fungi	TRUE	TRUE	286	108	43	99
Streptococcus mitis	bacteria	TRUE	TRUE	357	87	44	44
Streptococcus pneumoniae	bacteria	TRUE	FALSE	247	55	45	18
Staphylococcus warneri	bacteria	TRUE	TRUE	552	147	46	7
Prevotella jejuni	bacteria	FALSE	FALSE	449	16	47	31
Veillonella parvula	bacteria	FALSE	FALSE	140	26	48	21
Aspergillus oryzae	fungi	FALSE	TRUE	23	37	49	350
Gemella haemolysans	bacteria	TRUE	FALSE	407	310	50	72
Delftia lacustris	bacteria	TRUE	TRUE	765	2760	51	238
[Candida] glabrata	fungi	FALSE	FALSE	344	583	52	90
Anaerococcus vaginalis	bacteria	FALSE	FALSE	516	375	53	112
Prevotella denticola	bacteria	FALSE	FALSE	317	17	54	32
Staphylococcus capitis	bacteria	TRUE	TRUE	329	153	55	17
Staphylococcus simulans	bacteria	FALSE	FALSE	278	192	56	46
Rhizobium oryzihabitans	bacteria	TRUE	TRUE	6929.5	4320	57	249
Gemella morbillorum	bacteria	FALSE	FALSE	425	203	58	115
Staphylococcus pasteuri	bacteria	TRUE	TRUE	591	212	59	16
Achromobacter sp. AONIH1	bacteria	TRUE	TRUE	3749	4419	60	285
Streptococcus agalactiae	bacteria	FALSE	FALSE	185	54	61	26
Prevotella intermedia	bacteria	FALSE	FALSE	197	7	62	20
Corynebacterium simulans	bacteria	TRUE	FALSE	1289	102	63	107
Prevotella sp. oral taxon 299	bacteria	FALSE	FALSE	510	24	64	64
Botrytis cinerea	fungi	FALSE	TRUE	33	56	65	315
Neurospora crassa	fungi	FALSE	TRUE	83	190	66	111
Streptococcus periodonticum	bacteria	FALSE	FALSE	3526.5	428	67	169
Mycoplasma hominis	bacteria	TRUE	FALSE	412	545	68	89
Corynebacterium tuberculostearicum	bacteria	TRUE	TRUE	169	38	69	56
Streptococcus sp. NSJ-72	bacteria	FALSE	FALSE	2954.5	184	70	158
Streptococcus sp. oral taxon 431	bacteria	FALSE	FALSE	2005	128	71	103
Lactobacillus crispatus	bacteria	TRUE	FALSE	1188	626	72	188
Streptococcus dysgalactiae	bacteria	FALSE	TRUE	370	69	73	23
Kluyveromyces marxianus	fungi	FALSE	FALSE	57	109	74	193
Naumovozyma castellii	fungi	FALSE	FALSE	53	100	75	302
Candida orthopsilosis	fungi	FALSE	FALSE	135	268	76	202
Colletotrichum higginsianum	fungi	FALSE	FALSE	49	122	77	440
Staphylococcus lugdunensis	bacteria	FALSE	FALSE	479	130	78	19
Staphylococcus saccharolyticus	bacteria	TRUE	FALSE	1086	367	79	9
Corynebacterium striatum	bacteria	TRUE	FALSE	238	71	80	137
Staphylococcus pettenkoferi	bacteria	TRUE	FALSE	1240	241	81	10
Clostridium botulinum	bacteria	FALSE	TRUE	64	114	82	128
Lactobacillus johnsonii	bacteria	FALSE	FALSE	390.5	305	83	76
Mycobacteroides chelonae	bacteria	TRUE	TRUE	3104	2016	84	393
Ligilactobacillus salivarius	bacteria	TRUE	FALSE	322	172	85	80
Agrobacterium tumefaciens	bacteria	TRUE	TRUE	789	630.5	86	461
Mycoplasma orale	bacteria	FALSE	FALSE	2281	1623	87	153
Streptococcus sp. oral taxon 061	bacteria	FALSE	FALSE	913	96	88	79
Staphylococcus equorum	bacteria	FALSE	FALSE	587	263	89	28
Streptococcus constellatus	bacteria	FALSE	FALSE	2211	106	90	186
Lacticaseibacillus paracasei	bacteria	TRUE	FALSE	952	193	91	70
Proteus mirabilis	bacteria	FALSE	TRUE	213	376	92	278
Pseudomonas aeruginosa	bacteria	TRUE	TRUE	55	183	93	300
Bifidobacterium breve	bacteria	TRUE	FALSE	3045.5	398	94	234
Peptoniphilus harei	bacteria	TRUE	FALSE	839	414	95	166
Delftia sp. HK171	bacteria	TRUE	TRUE	4856	7207	96	665
Comamonas testosteroni	bacteria	TRUE	TRUE	419	606	97	374
Streptococcus sp. oral taxon 064	bacteria	FALSE	FALSE	397	273	98	213
Streptococcus australis	bacteria	TRUE	FALSE	1531	148	99	159
Human alphaherpesvirus 1	virus_DNAvertebrates	TRUE	FALSE	3024	5071.5	100	415
Streptococcus parasanguinis	bacteria	FALSE	FALSE	2160.5	134	101	121
Streptococcus gordonii	bacteria	FALSE	FALSE	409	80	102	83
Serratia marcescens	bacteria	TRUE	FALSE	71	151	103	394
Corynebacterium jeikeium	bacteria	FALSE	FALSE	550	119	104	123
Acinetobacter baumannii	bacteria	TRUE	TRUE	167	213	105	110
Delftia sp. Cs1-4	bacteria	TRUE	TRUE	4315.5	7207	106	710
Microbacterium sp. PM5	bacteria	TRUE	TRUE	4205	3707	107	565
Buchnera aphidicola	bacteria	FALSE	FALSE	86	144	108	216
Staphylococcus caprae	bacteria	FALSE	FALSE	879	235	109	27
Clostridioides difficile	bacteria	FALSE	FALSE	101	91	110	100
Lactococcus lactis	bacteria	TRUE	FALSE	177	221	111	102
Streptococcus salivarius	bacteria	TRUE	TRUE	499	88	112	124
Prevotella scopos	bacteria	FALSE	FALSE	533	19	113	39
Variovorax paradoxus	bacteria	TRUE	TRUE	270	479	114	677
Anaerococcus prevotii	bacteria	FALSE	FALSE	521	390	115	286
Staphylococcus saprophyticus	bacteria	FALSE	FALSE	343	174	116	33
Staphylococcus simiae	bacteria	FALSE	FALSE	741	440	117	42
Staphylococcus pseudintermedius	bacteria	FALSE	FALSE	411	162	118	30
Staphylococcus sciuri	bacteria	FALSE	FALSE	257	222	119	41
Bacillus subtilis	bacteria	TRUE	FALSE	153	135	120	82
Blattabacterium cuenoti	bacteria	TRUE	FALSE	88	139	121	161
Streptococcus sp. LPB0220	bacteria	FALSE	FALSE	3363	227	122	199
Moraxella osloensis	bacteria	TRUE	TRUE	547	538	123	279
Streptococcus sanguinis	bacteria	TRUE	FALSE	361	95	124	84
Staphylococcus cohnii	bacteria	FALSE	TRUE	141	127	125	49
Streptococcus cristatus	bacteria	FALSE	FALSE	451	77	126	71
Campylobacter concisus	bacteria	FALSE	FALSE	145	115	127	220
Thermothielavioides terrestris	fungi	FALSE	FALSE	63	169	128	884
Staphylococcus argenteus	bacteria	TRUE	FALSE	2389	590	129	34
Veillonella atypica	bacteria	FALSE	FALSE	841	104	130	201
Clostridium perfringens	bacteria	FALSE	FALSE	98	163	131	135
Streptococcus gwangjuense	bacteria	TRUE	FALSE	3148	427	132	119
Veillonella nakazawae	bacteria	FALSE	TRUE	1094	76	133	129
Rhizobium pusense	bacteria	TRUE	TRUE	3391.5	1317	134	424
Prochlorococcus marinus	bacteria	FALSE	FALSE	74	165	135	228
Fusobacterium gonidiaformans	bacteria	FALSE	FALSE	1904	1622	136	392
Streptococcus sp. 116-D4	bacteria	FALSE	FALSE	2204.5	216	137	224
Streptococcus canis	bacteria	FALSE	TRUE	1689	270	138	174
Cercospora beticola	fungi	FALSE	TRUE	323	665	139	845
Lactiplantibacillus plantarum	bacteria	TRUE	FALSE	191	121	140	62
Limosilactobacillus fermentum	bacteria	FALSE	TRUE	32	49	141	139
Streptococcus sp. HSISM1	bacteria	FALSE	FALSE	1217	159	142	323
Gemella sanguinis	bacteria	FALSE	FALSE	240	380	143	256
Streptococcus pseudopneumoniae	bacteria	FALSE	FALSE	1144	332	144	130
Sphaerospermopsis kisseleviana	bacteria	FALSE	FALSE	518	1600	145	1271
Mogibacterium diversum	bacteria	TRUE	FALSE	1111	199	146	268
Prevotella fusca	bacteria	FALSE	FALSE	827	27	147	45
Naumovozyma dairenensis	fungi	FALSE	FALSE	107	244	148	348
Streptococcus thermophilus	bacteria	TRUE	TRUE	770	94	149	54
Pseudomonas putida	bacteria	TRUE	TRUE	143	252	150	508
Veillonella dispar	bacteria	FALSE	FALSE	1440	89	151	162
Scheffersomyces stipitis	fungi	FALSE	FALSE	179	510	152	377
Enterococcus avium	bacteria	TRUE	FALSE	706	272	153	81
Anaerococcus mediterraneensis	bacteria	FALSE	FALSE	972	308	154	141
Ustilago maydis	fungi	FALSE	TRUE	165	432	155	1503
Thermothelomyces thermophilus	fungi	FALSE	FALSE	70	188	156	735.5
Tetrapisispora blattae	fungi	FALSE	FALSE	201	529	157	467
Streptococcus sp. 1643	bacteria	TRUE	FALSE	4107.5	291	158	218
Ureaplasma urealyticum	bacteria	TRUE	FALSE	1612	3085	159	763
Mycobacterium sp. YC-RL4	bacteria	TRUE	FALSE	3196	2719	160	1006
Xanthomonas campestris	bacteria	TRUE	TRUE	1565	1726.5	161	638
Rothia mucilaginosa	bacteria	TRUE	TRUE	2168.5	116	162	187
Klebsiella sp. LY	bacteria	FALSE	FALSE	56	103	163	5377
Herbaspirillum huttiense	bacteria	TRUE	TRUE	366	834	164	853
Streptococcus mutans	bacteria	FALSE	TRUE	653	154	165	114
Variovorax sp. PMC12	bacteria	TRUE	TRUE	2128	2912.5	166	1066
Streptococcus sp. NPS 308	bacteria	TRUE	FALSE	3471	260	167	191
Staphylococcus xylosus	bacteria	FALSE	FALSE	292	256	168	53
Streptococcus suis	bacteria	FALSE	FALSE	264	101	169	63
Fusarium verticillioides	fungi	FALSE	TRUE	79	207	170	499
Enterococcus durans	bacteria	TRUE	FALSE	826	540	171	108
Prevotella enoeca	bacteria	FALSE	FALSE	1044	28	172	59
Klebsiella oxytoca	bacteria	TRUE	TRUE	17	22	173	620
Desulfosporosinus orientis	bacteria	TRUE	TRUE	1278.5	912	174	712
Saccharomyces cerevisiae	fungi	FALSE	TRUE	166	514	175	425
Fusobacterium pseudoperiodonticum	bacteria	FALSE	FALSE	241	277	176	341
Streptococcus sp. A12	bacteria	FALSE	FALSE	2952	233	177	360
Talaromyces rugulosus	fungi	FALSE	FALSE	67	195	178	704
Anaerostipes rhamnosivorans	bacteria	FALSE	FALSE	294	466	179	1144
Clostridium beijerinckii	bacteria	FALSE	FALSE	144	225	180	229
Staphylococcus vitulinus	bacteria	TRUE	FALSE	888	938	181	68
Clostridium butyricum	bacteria	TRUE	FALSE	164	281	182	261
Fusarium fujikuroi	fungi	FALSE	TRUE	189	491	183	867
Aspergillus fumigatus	fungi	TRUE	TRUE	563	1588	184	1057
Microbacterium hominis	bacteria	TRUE	TRUE	1246	926	185	787
Clostridium pasteurianum	bacteria	FALSE	FALSE	149	220	186	237
Streptomyces rimosus	bacteria	TRUE	FALSE	1178	1790	187	5377
Staphylococcus auricularis	bacteria	TRUE	FALSE	2393	818	188	48
Helicobacter pylori	bacteria	FALSE	FALSE	93	186	189	498
Actinomyces pacaensis	bacteria	FALSE	FALSE	2468	57	190	150
Streptococcus iniae	bacteria	FALSE	TRUE	1792	720	191	180
Mycoplasma hyosynoviae	bacteria	TRUE	FALSE	3303.5	1347	192	101
Tetrapisispora phaffii	fungi	FALSE	FALSE	128	339	193	549
Staphylococcus arlettae	bacteria	FALSE	FALSE	1422	677	194	38
Bacillus mycoides	bacteria	TRUE	TRUE	283	509	195	420
Schaalia odontolytica	bacteria	TRUE	FALSE	1580	78	196	294
Schizosaccharomyces pombe	fungi	FALSE	FALSE	114	283	197	705
Micrococcus luteus	bacteria	TRUE	TRUE	871	572	198	562
Enterococcus cecorum	bacteria	TRUE	FALSE	833	431	199	95
Proteus vulgaris	bacteria	FALSE	TRUE	61	129	200	448
Staphylococcus schweitzeri	bacteria	FALSE	FALSE	1986	1046	201	106
Fannyhessea vaginae	bacteria	TRUE	FALSE	3689	436	202	253
Pichia kudriavzevii	fungi	FALSE	FALSE	91	232	203	624
Corynebacterium amycolatum	bacteria	TRUE	FALSE	6929.5	450	204	395
Sugiyamaella lignohabitans	fungi	FALSE	FALSE	170	387	205	568
Staphylococcus nepalensis	bacteria	FALSE	FALSE	352	385	206	66
Mameliella alba	bacteria	FALSE	FALSE	102	230	207	5377
Staphylococcus lentus	bacteria	FALSE	FALSE	267	437	208	87
Staphylococcus felis	bacteria	TRUE	FALSE	2097	513	209	52
Clostridium saccharobutylicum	bacteria	FALSE	FALSE	219	368	210	511
Pyricularia pennisetigena	fungi	FALSE	FALSE	137	381	211	711
Candidatus Erwinia haradaeae	bacteria	FALSE	FALSE	138	297	212	587
Dermacoccus nishinomiyaensis	bacteria	TRUE	TRUE	2794	1624	213	539
Propionibacterium sp. oral taxon 193	bacteria	TRUE	TRUE	3061	2058	214	795
Enterococcus mundtii	bacteria	TRUE	FALSE	730	575	215	140
Zygotorulaspora mrakii	fungi	FALSE	FALSE	899	1604	216	496
Kluyveromyces lactis	fungi	FALSE	FALSE	539	1197	217	494
Clostridium septicum	bacteria	FALSE	FALSE	244	535	218	329
Mycobacterium sp. QIA-37	bacteria	TRUE	TRUE	6929.5	7207	219	1171
Bacteroides fragilis	bacteria	FALSE	FALSE	81	60	220	163
Citrobacter freundii	bacteria	TRUE	TRUE	196	290	221	450
Bacillus filamentosus	bacteria	TRUE	TRUE	627	845	222	337
Staphylococcus succinus	bacteria	TRUE	FALSE	1135	758	223	77
Macrococcus canis	bacteria	TRUE	TRUE	431	519	224	113
Fusarium pseudograminearum	fungi	FALSE	TRUE	65	180	225	637
Campylobacter jejuni	bacteria	TRUE	FALSE	199	229	226	344
Fusarium oxysporum	fungi	FALSE	TRUE	109	349	227	672
Mycoplasma phocidae	bacteria	FALSE	FALSE	2091	1959.5	228	131
Saccharomyces eubayanus	fungi	FALSE	FALSE	309	711	229	495
Streptococcus equi	bacteria	FALSE	FALSE	767	137	230	78
Pneumocystis jirovecii	fungi	FALSE	FALSE	291	859	231	719
Bradyrhizobium erythrophlei	bacteria	TRUE	TRUE	85	200	232	1600.5
Zymoseptoria tritici	fungi	FALSE	FALSE	94	280	233	1175
Saccharomyces paradoxus	fungi	FALSE	FALSE	127	384	234	603
Pyricularia oryzae	fungi	FALSE	TRUE	125	346	235	997
Pseudomonas fluorescens	bacteria	TRUE	TRUE	15	25	236	600
Zygosaccharomyces rouxii	fungi	FALSE	FALSE	255	803	237	507
Pyricularia grisea	fungi	FALSE	FALSE	129	336	238	852
Porphyromonas gingivalis	bacteria	FALSE	FALSE	560	31	239	120
Staphylococcus muscae	bacteria	TRUE	FALSE	3130	1698	240	55
Sporisorium graminicola	fungi	FALSE	FALSE	119	342	241	911
Abiotrophia defectiva	bacteria	TRUE	FALSE	3588	157	242	98
Sorangium cellulosum	bacteria	TRUE	FALSE	139	236	243	1517
Amphibacillus xylanus	bacteria	FALSE	FALSE	87	204	244	352
Clostridium saccharoperbutylacetonicum	bacteria	FALSE	FALSE	173	288	245	465
Leptotrichia wadei	bacteria	TRUE	FALSE	403	462	246	358
[Candida] auris	fungi	FALSE	FALSE	151	292	247	693
Clostridium kluyveri	bacteria	FALSE	FALSE	246	403	248	445
Mycoplasma canadense	bacteria	FALSE	FALSE	2176.5	1529	249	204
Streptococcus equinus	bacteria	FALSE	FALSE	1068	262	250	104
Dialister pneumosintes	bacteria	TRUE	FALSE	1495	249	251	619
Staphylococcus chromogenes	bacteria	TRUE	FALSE	1249	553	252	65
Fusarium venenatum	fungi	FALSE	FALSE	117	317	253	883
Epilithonimonas vandammei	bacteria	TRUE	FALSE	728	454	254	541
Corynebacterium sp. ATCC 6931	bacteria	TRUE	FALSE	4928.5	585	255	547
Escherichia albertii	bacteria	FALSE	TRUE	1448	1681	256	1354
Paraclostridium bifermentans	bacteria	TRUE	FALSE	300	531	257	532
Streptococcus koreensis	bacteria	FALSE	FALSE	2967	582	258	266
Arcobacter cryaerophilus	bacteria	FALSE	FALSE	262	422	259	563
Enterobacter hormaechei	bacteria	FALSE	TRUE	29	41	260	760
Bordetella hinzii	bacteria	TRUE	TRUE	2822	3569	261	1805.5
Clostridium baratii	bacteria	FALSE	FALSE	214	388	262	582
Pseudolysobacter antarcticus	bacteria	TRUE	FALSE	3564	3509	263	1514
Mycoplasma struthionis	bacteria	FALSE	FALSE	2486	2553	264	215
Corynebacterium segmentosum	bacteria	TRUE	FALSE	1061	84	265	195
Clostridium argentinense	bacteria	FALSE	FALSE	260	477	266	473
Fusobacterium hwasookii	bacteria	FALSE	FALSE	181	275	267	287
Pochonia chlamydosporia	fungi	FALSE	FALSE	126	324	268	941
Bacillus pumilus	bacteria	TRUE	FALSE	183	372	269	235
Tenacibaculum dicentrarchi	bacteria	TRUE	FALSE	1016.5	1574	270	1693.5
Carnobacterium maltaromaticum	bacteria	FALSE	FALSE	473	397	271	134
Filifactor alocis	bacteria	FALSE	FALSE	690	181	272	304
Acinetobacter johnsonii	bacteria	TRUE	TRUE	999	1414	273	900
Streptococcus sp. HSISS2	bacteria	FALSE	FALSE	6929.5	733	274	313
Clostridium sporogenes	bacteria	FALSE	FALSE	123	210	275	491
Bacillus velezensis	bacteria	TRUE	FALSE	111	164	276	319
Ochrobactrum pseudogrignonense	bacteria	FALSE	FALSE	174	446	277	5377
Kazachstania naganishii	fungi	FALSE	FALSE	206	699	278	846
Labilibaculum antarcticum	bacteria	TRUE	FALSE	543	499	279	651
Torulaspora delbrueckii	fungi	FALSE	FALSE	910	1860	280	634
Clostridium tetani	bacteria	FALSE	FALSE	228	416	281	403
Pseudomonas tolaasii	bacteria	TRUE	TRUE	4921	5420	282	1877
Nostoc sp. NIES-4103	bacteria	FALSE	FALSE	124	307	283	1047
Erwinia billingiae	bacteria	TRUE	TRUE	4750.5	3454	284	1138
Mogibacterium pumilum	bacteria	FALSE	FALSE	2401	152	285	280
Escherichia marmotae	bacteria	FALSE	TRUE	1227	2260	286	1588.5
Streptococcus pseudoporcinus	bacteria	FALSE	FALSE	1592	202	287	94
Halanaerobium hydrogeniformans	bacteria	FALSE	FALSE	1090	1408	288	818
Variovorax sp. PAMC26660	bacteria	TRUE	TRUE	878	1880	289	1406
Providencia rettgeri	bacteria	FALSE	FALSE	212	461	290	741
Lactobacillus helveticus	bacteria	FALSE	FALSE	314	407	291	297
Flavobacterium columnare	bacteria	FALSE	FALSE	34	59	292	558
Macrococcus caseolyticus	bacteria	FALSE	FALSE	1067	769	293	92
Fusobacterium varium	bacteria	FALSE	FALSE	254	434	294	697
Lactobacillus iners	bacteria	TRUE	FALSE	486	218	295	172
Pseudomonas stutzeri	bacteria	TRUE	TRUE	417	451	296	972.5
Aeromonas veronii	bacteria	TRUE	FALSE	1023	868	297	886
Staphylococcus kloosii	bacteria	TRUE	FALSE	1339	822	298	85
Chryseobacterium sp. JV274	bacteria	TRUE	TRUE	1108	1467	299	1392.5
Streptococcus sp. I-G2	bacteria	FALSE	TRUE	4599	383	300	382
Paeniclostridium sordellii	bacteria	FALSE	FALSE	293	498	301	404
Clostridium novyi	bacteria	TRUE	FALSE	208	286	302	243
Staphylococcus sp. 17KM0847	bacteria	TRUE	FALSE	1337	642	303	75
Yarrowia lipolytica	fungi	FALSE	TRUE	209	608	304	767
Carnobacterium divergens	bacteria	TRUE	FALSE	1155	656	305	156
Streptococcus gallolyticus	bacteria	FALSE	FALSE	630	313	306	142
Shigella flexneri	bacteria	FALSE	TRUE	1720.5	3524	307	5377
Komagataella phaffii	fungi	FALSE	FALSE	1937	3011	308	1249
Burkholderia cenocepacia	bacteria	TRUE	FALSE	1538.5	1502	309	922
Acinetobacter pittii	bacteria	TRUE	TRUE	394	739	310	666
Haemophilus parainfluenzae	bacteria	FALSE	TRUE	118	187	311	462
Staphylococcus agnetis	bacteria	TRUE	FALSE	1691.5	497	312	67
Prevotella dentalis	bacteria	FALSE	FALSE	1402	44	313	116
Romboutsia sp. CE17	bacteria	FALSE	FALSE	84	143	314	513
Corynebacterium ureicelerivorans	bacteria	TRUE	TRUE	2666.5	392	315	684
Eremothecium cymbalariae	fungi	FALSE	FALSE	256	881	316	716
Clostridium sp. DL-VIII	bacteria	FALSE	FALSE	215	506	317	656
Brachyspira pilosicoli	bacteria	FALSE	FALSE	318	616	318	578
Leptotrichia sp. oral taxon 212	bacteria	FALSE	FALSE	402	415	319	654
Tetragenococcus halophilus	bacteria	FALSE	FALSE	710	555	320	154
Bacillus dafuensis	bacteria	FALSE	FALSE	58	120	321	299
Akkermansia muciniphila	bacteria	TRUE	FALSE	1396	1157	322	1511.5
Tepiditoga spiralis	bacteria	FALSE	FALSE	180	441	323	958
Rickettsia heilongjiangensis	bacteria	FALSE	FALSE	6929.5	7207	324	5377
Fusobacterium ulcerans	bacteria	FALSE	FALSE	203	311	325	449
Enterococcus saigonensis	bacteria	TRUE	FALSE	796	952	326	125
Prevotella ruminicola	bacteria	FALSE	FALSE	1708	132	327	146
Shigella dysenteriae	bacteria	FALSE	TRUE	6929.5	7207	328	5377
Lactococcus garvieae	bacteria	TRUE	FALSE	546	556	329	138
Pyrolobus fumarii	archaea	FALSE	FALSE	158	455	330	5377
Escherichia fergusonii	bacteria	FALSE	TRUE	1954	2306	331	1586
Enterococcus thailandicus	bacteria	TRUE	FALSE	1819	939	332	160
Ochrobactrum anthropi	bacteria	TRUE	TRUE	6929.5	4156	333	1789
Clostridium cochlearium	bacteria	FALSE	FALSE	437	934	334	769
Bacillus circulans	bacteria	TRUE	FALSE	207	359	335	246
Lachnoanaerobaculum umeaense	bacteria	FALSE	FALSE	339	255	336	275
Limosilactobacillus reuteri	bacteria	TRUE	FALSE	534	250	337	155
Streptococcus porcinus	bacteria	FALSE	FALSE	1161	242	338	178
Corynebacterium singulare	bacteria	TRUE	FALSE	1410	173	339	311
Enterococcus wangshanyuanii	bacteria	FALSE	FALSE	1378	707	340	118
Peptacetobacter hiranonis	bacteria	FALSE	FALSE	490	598	341	339
Cryptococcus neoformans	fungi	FALSE	FALSE	231	686	342	1105
Streptococcus urinalis	bacteria	TRUE	FALSE	1855	546	343	196
Listeria monocytogenes	bacteria	TRUE	FALSE	288	141	344	143
Enterobacter cloacae	bacteria	TRUE	TRUE	395	457	345	518
Staphylococcus stepanovicii	bacteria	TRUE	FALSE	924	968	346	109
Staphylococcus carnosus	bacteria	TRUE	FALSE	1888	744	347	93
Arcobacter butzleri	bacteria	FALSE	FALSE	298	705	348	551
Corynebacterium aurimucosum	bacteria	FALSE	FALSE	1298	140	349	307
Stanieria cyanosphaera	bacteria	FALSE	FALSE	171	467	350	1136
Eremothecium sinecaudum	fungi	FALSE	FALSE	1618	2853.5	351	682
Clostridium sp. CT4	bacteria	FALSE	FALSE	297	417	352	419
Streptomyces sp. RTd22	bacteria	TRUE	FALSE	1209	1779	353	1850
Clostridium intestinale	bacteria	FALSE	FALSE	202	351	354	640
Enterobacter roggenkampii	bacteria	TRUE	TRUE	2848	2181	355	1095
Kazachstania africana	fungi	FALSE	FALSE	472	1377	356	590
Rothia dentocariosa	bacteria	TRUE	TRUE	1903	123	357	446
Clostridium cellulovorans	bacteria	FALSE	FALSE	305	527	358	723
Mycoplasma arthritidis	bacteria	FALSE	FALSE	2122	1162	359	184
Fusarium graminearum	fungi	FALSE	TRUE	175	515	360	1258
Staphylococcus sp. SDB 2975	bacteria	FALSE	FALSE	1814.5	1130	361	145
Jeotgalibaca ciconiae	bacteria	TRUE	FALSE	1464	1165	362	165
Sporosarcina pasteurii	bacteria	TRUE	FALSE	2170	2423	363	681
Acinetobacter guillouiae	bacteria	TRUE	TRUE	2157	3788	364	882
Bacillus pseudomycoides	bacteria	TRUE	FALSE	372	747	365	700
Streptococcus himalayensis	bacteria	FALSE	FALSE	1849	690	367	222
Mycoplasma alkalescens	bacteria	TRUE	FALSE	2272	2121	367	208
Brochothrix thermosphacta	bacteria	TRUE	TRUE	940	752	367	333
Sinomonas atrocyanea	bacteria	TRUE	FALSE	1804	1866	369	5377
Romboutsia ilealis	bacteria	FALSE	FALSE	324	536	370	577
Romboutsia hominis	bacteria	FALSE	FALSE	284	503	371.5	464
Streptococcus vestibularis	bacteria	TRUE	FALSE	3815	373	371.5	421
Ralstonia insidiosa	bacteria	TRUE	TRUE	172	439	373	1252.5
Wenyingzhuangia fucanilytica	bacteria	FALSE	FALSE	769	922	374	1000
Crassaminicella sp. SY095	bacteria	FALSE	FALSE	465	584	375	648
Staphylococcus sp. 23_2_7_LY	bacteria	TRUE	FALSE	1605	1149	376	151
Campylobacter lari	bacteria	FALSE	FALSE	332	645	377	756
Clostridium taeniosporum	bacteria	FALSE	FALSE	282	526	378	876
Staphylococcus lutrae	bacteria	TRUE	FALSE	2130	2145	379	91
Macrococcus sp. IME1552	bacteria	TRUE	FALSE	1082	1058	380	96
Clostridium carboxidivorans	bacteria	FALSE	FALSE	186	294	381.5	605
Enterococcus hirae	bacteria	FALSE	FALSE	603	475	381.5	236
Carnobacterium sp. 17-4	bacteria	TRUE	FALSE	1062	1064.5	383	147
Elizabethkingia anophelis	bacteria	TRUE	FALSE	249	329	384	525
Ezakiella massiliensis	bacteria	FALSE	FALSE	994.5	458	385	412
Auricoccus indicus	bacteria	TRUE	TRUE	1821.5	956	386	183
Lactobacillus acidophilus	bacteria	FALSE	FALSE	1511	612	387	342
Mycoplasma anseris	bacteria	FALSE	FALSE	1897	1893	388	346
Methanococcus maripaludis	archaea	FALSE	FALSE	1393	2279	389	1115.5
Poseidonibacter lekithochrous	bacteria	FALSE	FALSE	643	1307	390	1082
Pediococcus acidilactici	bacteria	FALSE	FALSE	1218	628	391	225
Clostridium acetobutylicum	bacteria	FALSE	FALSE	337	528	392	560
Vagococcus carniphilus	bacteria	FALSE	FALSE	834	722	393	126
Burkholderia pseudomallei	bacteria	FALSE	FALSE	75	178	394	1830
Empedobacter brevis	bacteria	FALSE	FALSE	190	350	395	951
Fusobacterium mortiferum	bacteria	FALSE	FALSE	526	860	396	1075
Clostridium estertheticum	bacteria	FALSE	FALSE	285	569	397	591
Clostridium sp. 'deep sea'	bacteria	FALSE	FALSE	484.5	951	398	948
Nostoc sp. NIES-3756	bacteria	FALSE	FALSE	105	269	399	5377
Lactobacillus vaginalis	bacteria	TRUE	FALSE	4423	2662	400	512
Ogataea parapolymorpha	fungi	FALSE	FALSE	3268.5	4221	401	766
Lactobacillus jensenii	bacteria	FALSE	FALSE	760	470	402	233
Tannerella forsythia	bacteria	FALSE	FALSE	369	43	403	271
Mycoplasma gallinaceum	bacteria	FALSE	FALSE	1408	2111	404	678
Acinetobacter seifertii	bacteria	TRUE	TRUE	456	897	405	746.5
Mycolicibacterium vaccae	bacteria	TRUE	FALSE	3065.5	3031.5	406	5377
Kordia antarctica	bacteria	TRUE	FALSE	582	674	407	1356
Mycoplasma mycoides	bacteria	FALSE	FALSE	356	732	408	540
Rhodopseudomonas palustris	bacteria	TRUE	TRUE	281	395	409	1104
Legionella pneumophila	bacteria	FALSE	FALSE	41	83	410	664
Capnocytophaga gingivalis	bacteria	FALSE	FALSE	233	156	411	543
Clostridium sp. JN-1	bacteria	FALSE	FALSE	380	533	412	746.5
Clostridium isatidis	bacteria	FALSE	FALSE	520	805	413	621
Flavobacterium sp. 140616W15	bacteria	TRUE	FALSE	576	788	414	879
Gilliamella apicola	bacteria	FALSE	FALSE	253	571	415	1012
Clostridium sp. AWRP	bacteria	FALSE	FALSE	251	522	416	633
Microbacterium sp. 1S1	bacteria	TRUE	FALSE	3415	2481	417	5377
Minicystis rosea	bacteria	TRUE	FALSE	677	1184	418	5377
Piscirickettsia salmonis	bacteria	TRUE	FALSE	589	1145	419	1107
Hathewaya histolytica	bacteria	FALSE	FALSE	347	576	420	451
Pediococcus pentosaceus	bacteria	FALSE	FALSE	787	967	421	211
Ehrlichia ruminantium	bacteria	FALSE	FALSE	302	819	422	1014
Klebsiella aerogenes	bacteria	TRUE	FALSE	746	777	423	987
Bacteroides cellulosilyticus	bacteria	TRUE	FALSE	916	319	424	489
Pseudomonas chlororaphis	bacteria	TRUE	TRUE	386	635	425	1331
Leptospira interrogans	bacteria	FALSE	FALSE	274	673	426	1043
Achromobacter denitrificans	bacteria	TRUE	TRUE	956	1848	427	2003.5
Clostridium scatologenes	bacteria	FALSE	FALSE	382	638	428	863
Clostridium bornimense	bacteria	FALSE	FALSE	328	493	429	452
Brachyspira hyodysenteriae	bacteria	FALSE	FALSE	331	627	430	1013
Planomicrobium glaciei	bacteria	TRUE	FALSE	2972	2717.5	431	1265.5
Staphylococcus schleiferi	bacteria	FALSE	FALSE	1835	931	432	122
Virgibacillus halodenitrificans	bacteria	TRUE	FALSE	798	830	433	554
Bacillus thermoamylovorans	bacteria	TRUE	TRUE	935	1010	434	362
Pseudomonas sp. URMO17WK12:I11	bacteria	TRUE	TRUE	4487	5148	435	1604
Methanosarcina barkeri	archaea	FALSE	FALSE	1219	1732	436	1124
Mycoplasma cloacale	bacteria	FALSE	FALSE	2149.5	2378	437	381
Chondrocystis sp. NIES-4102	bacteria	TRUE	FALSE	593	1112	438	685
Melissococcus plutonius	bacteria	FALSE	FALSE	714	955	439	247
Eremothecium gossypii	fungi	FALSE	FALSE	1322.5	1902	440	676
Clostridium tyrobutyricum	bacteria	FALSE	FALSE	438	657	441	556
Longibaculum sp. KGMB06250	bacteria	FALSE	FALSE	549	586	442	306
Candidatus Arthromitus sp. SFB-rat-Yit	bacteria	FALSE	FALSE	480	865	443	1118
Vagococcus sp. HDW17A	bacteria	TRUE	FALSE	3019	1636	444.5	179
Streptococcus merionis	bacteria	FALSE	FALSE	2219	607	444.5	170
Chryseobacterium indologenes	bacteria	TRUE	FALSE	315	418	446	588
Cellulophaga baltica	bacteria	TRUE	FALSE	1092	1088	447	226
Arcobacter defluvii	bacteria	FALSE	FALSE	461	1268	448	477
Sarcina sp. JB2	bacteria	FALSE	FALSE	399	542	449	701
Cytobacillus oceanisediminis	bacteria	TRUE	FALSE	509	880	450	372
Enterococcus gilvus	bacteria	TRUE	FALSE	2612	1163	451	182
Mycoplasma phocicerebrale	bacteria	FALSE	FALSE	1790	2453.5	452	569
Staphylococcus sp. M0911	bacteria	FALSE	TRUE	3664	2386.5	453	152
Orientia tsutsugamushi	bacteria	FALSE	FALSE	427	1208	454	1198
Serratia symbiotica	bacteria	FALSE	FALSE	367	753	455	857
Aerococcus urinaeequi	bacteria	TRUE	FALSE	1529	889	456	338
Bacillus sp. THAF10	bacteria	TRUE	FALSE	894	1351	457	388
Francisella frigiditurris	bacteria	FALSE	FALSE	1175	2204	458	1708
Paenibacillus polymyxa	bacteria	TRUE	FALSE	148	197	459	258
Streptococcus parauberis	bacteria	FALSE	FALSE	1060	525	460	136
Leptotrichia trevisanii	bacteria	FALSE	FALSE	454	353	461	702
Chryseobacterium shandongense	bacteria	TRUE	TRUE	629	596	462.5	836
Synechococcus sp. NOUM97013	bacteria	TRUE	FALSE	6929.5	5257	462.5	5377
Carnobacterium inhibens	bacteria	TRUE	FALSE	1568	1310	464	241
Glaesserella sp. 15-184	bacteria	FALSE	FALSE	112	303	465	2136.5
Streptobacillus moniliformis	bacteria	FALSE	FALSE	529	543	466	995
Lachancea thermotolerans	fungi	FALSE	FALSE	1584	3314	467	1283
Sphingomonas melonis	bacteria	TRUE	TRUE	3377.5	3679	468	2320
Clavibacter michiganensis	bacteria	TRUE	TRUE	981	838	469	2220.5
Flammeovirga pectinis	bacteria	FALSE	FALSE	375	505	470	726
Vagococcus sp. HDW17B	bacteria	TRUE	FALSE	1447	1276	471	171
Escherichia sp. E4742	bacteria	FALSE	TRUE	3549	3921.5	472	5377
Ureaplasma parvum	bacteria	FALSE	FALSE	2579	2439	473	1084
Flavobacterium crocinum	bacteria	TRUE	FALSE	726	987	474	1576
Streptococcus marmotae	bacteria	FALSE	FALSE	2748	649	475	105
Streptococcus sp. I-P16	bacteria	TRUE	FALSE	6929.5	356	476	340
Staphylococcus condimenti	bacteria	FALSE	FALSE	193	300	477	189
Cutibacterium granulosum	bacteria	TRUE	TRUE	2503.5	1255	478	969
Vagococcus teuberi	bacteria	TRUE	FALSE	2647	1004	479	173
Campylobacter sputorum	bacteria	FALSE	FALSE	524	776	480	896
Anaerocolumna sp. CBA3638	bacteria	TRUE	FALSE	488	716	481	504
Acetoanaerobium sticklandii	bacteria	FALSE	FALSE	918	1342	482	773
Streptomyces glomeroaurantiacus	bacteria	FALSE	FALSE	188	443	483	5377
Actinomyces oris	bacteria	TRUE	FALSE	162	112	484	974
Lysinibacillus sphaericus	bacteria	TRUE	FALSE	400	701	485	406
Halarcobacter ebronensis	bacteria	FALSE	FALSE	502	1340	486	1660
Variovorax boronicumulans	bacteria	TRUE	TRUE	2849	3719	487	1870.5
Modestobacter marinus	bacteria	TRUE	FALSE	1703	2386.5	488	5377
Aerococcus urinae	bacteria	TRUE	FALSE	1560	736	489	198
Mycoplasma canis	bacteria	FALSE	FALSE	1940	2612	490	291
Mycobacteroides salmoniphilum	bacteria	TRUE	TRUE	6929.5	5112	491	1495
Alistipes dispar	bacteria	TRUE	FALSE	4476.5	1341	492	2156.5
Lactobacillus delbrueckii	bacteria	FALSE	FALSE	226	358	493	328
Aquimarina sp. AD10	bacteria	TRUE	FALSE	422	689	494	808
Shewanella sp. Scap07	bacteria	TRUE	FALSE	25	35	495	493
Phocaeicola vulgatus	bacteria	FALSE	FALSE	466	142	496	214
Acidovorax sp. KKS102	bacteria	TRUE	TRUE	752	1896	497	2041.5
Calothrix parasitica	bacteria	FALSE	FALSE	311	795	498	898
Myroides sp. CJ210	bacteria	FALSE	FALSE	1691.5	1234	499	1352
Vagococcus sp. CF-49	bacteria	FALSE	FALSE	1524	1051	500.5	168
Gracilibacillus sp. SCU50	bacteria	TRUE	FALSE	434	708	500.5	289
Brachyspira intermedia	bacteria	FALSE	FALSE	554	1237	502	1234.5
Streptococcus sobrinus	bacteria	TRUE	FALSE	4611	413	503	133
Staphylococcus hyicus	bacteria	TRUE	FALSE	2312	2219	504	200
Burkholderia multivorans	bacteria	TRUE	FALSE	1436	1997	505	5377
Methylorubrum extorquens	bacteria	TRUE	TRUE	371	563	506	1375
Faecalibacterium prausnitzii	bacteria	TRUE	TRUE	224	198	507	416
Alicycliphilus denitrificans	bacteria	TRUE	TRUE	3647	3179.5	508	2101.5
Psychrobacillus glaciei	bacteria	TRUE	FALSE	1207.5	1640.5	509	298
Aquimarina sp. TRL1	bacteria	TRUE	FALSE	530	786	510	1463.5
Tissierellia sp. JN-28	bacteria	TRUE	FALSE	396	682	511	570
Polaribacter sp. KT25b	bacteria	FALSE	FALSE	478	858	512	1010
Arcobacter lanthieri	bacteria	FALSE	FALSE	335	855	513	1348
Vagococcus penaei	bacteria	TRUE	FALSE	2285.5	1630.5	514	192
Pantoea ananatis	bacteria	TRUE	TRUE	1502	1378	515	1053
Tetragenococcus koreensis	bacteria	FALSE	FALSE	2755	2119	516	335
Sphaerotilus natans	bacteria	TRUE	TRUE	2739	3071	517	5377
Bacillus marisflavi	bacteria	TRUE	FALSE	711	1108	518	326
Ramlibacter tataouinensis	bacteria	TRUE	TRUE	2051	2130	519	1564
Photobacterium damselae	bacteria	TRUE	FALSE	338	611	520	1289
Oceanobacillus iheyensis	bacteria	TRUE	FALSE	757	978	521	355
Fusobacterium sp. NSJ-57	bacteria	TRUE	FALSE	658	898	522	914
Leuconostoc mesenteroides	bacteria	TRUE	FALSE	685	727	523	331
Colwellia sp. PAMC 20917	bacteria	TRUE	FALSE	1036	1805	524	1333
Cellulophaga lytica	bacteria	FALSE	FALSE	290	364	525	611
Thiospirochaeta perfilievii	bacteria	FALSE	FALSE	531	1210	526	947
Anaerocolumna cellulosilytica	bacteria	FALSE	FALSE	556	541	527	483
Aequorivita sp. H23M31	bacteria	FALSE	FALSE	1809.5	1389	528	790
Flavobacterium johnsoniae	bacteria	FALSE	FALSE	46	92	529	920
Rhodocytophaga rosea	bacteria	TRUE	FALSE	631	1043	530	1425
Mycolicibacterium gilvum	bacteria	TRUE	FALSE	1442	1831	531	5377
Bacillus lentus	bacteria	TRUE	FALSE	481	791	532	361
Megasphaera elsdenii	bacteria	TRUE	TRUE	2115	412	533	764
Clostridium fermenticellae	bacteria	FALSE	FALSE	345	578	534	877
Cryobacterium arcticum	bacteria	TRUE	FALSE	1630	2101	535	5377
Fusobacterium necrophorum	bacteria	FALSE	FALSE	675	345	536	609
Lactococcus raffinolactis	bacteria	FALSE	FALSE	130	243	537	254
Sphingopyxis sp. EG6	bacteria	TRUE	TRUE	1055.5	4501	538	5377
Capnocytophaga sputigena	bacteria	TRUE	FALSE	1003.5	170	539	383
Mesoplasma florum	bacteria	FALSE	FALSE	592	1144	540	706
Thermoanaerobacterium thermosaccharolyticum	bacteria	TRUE	TRUE	392	591	541	794
Mycoplasma crocodyli	bacteria	FALSE	FALSE	1681	2988	542	772
Bacillus coagulans	bacteria	TRUE	TRUE	712.5	605	543	370
Nitrosomonas ureae	bacteria	TRUE	FALSE	2029	2237.5	544	2006.5
Brevibacillus laterosporus	bacteria	FALSE	FALSE	54	158	545	264
Malaciobacter mytili	bacteria	TRUE	FALSE	435	1127	546	1074
Halarcobacter bivalviorum	bacteria	TRUE	FALSE	424	1116	547	1042
[Clostridium] innocuum	bacteria	FALSE	FALSE	390.5	312	548	691
Veillonella rodentium	bacteria	FALSE	FALSE	1921	201	549	359
Megamonas funiformis	bacteria	FALSE	FALSE	853	567	551	538
Arthrobacter citreus	bacteria	TRUE	FALSE	368	895	551	675
Caloranaerobacter azorensis	bacteria	FALSE	FALSE	536	954	551	840
Campylobacter ureolyticus	bacteria	FALSE	FALSE	545	825.5	553	805
Olsenella uli	bacteria	FALSE	FALSE	2457	53	554	149
Rhodobacter sphaeroides	bacteria	TRUE	TRUE	695	810	555	1962.5
Thermoanaerobacterium sp. RBIITD	bacteria	FALSE	FALSE	446	894	556	1071.5
Staphylococcus virus Andhra	virus_DNAbacteria	FALSE	FALSE	6929.5	7207	557	1142
Campylobacter pinnipediorum	bacteria	FALSE	FALSE	482	943	558	937
Flavobacterium sp. HYN0086	bacteria	TRUE	FALSE	1095	989	559	1208
Sulfolobus sp. S-194	archaea	FALSE	FALSE	3106	4902.5	560	2411
Streptococcus ratti	bacteria	TRUE	FALSE	3497.5	1087	561	263
Trichodesmium erythraeum	bacteria	FALSE	FALSE	304	714	562	950
Streptococcus uberis	bacteria	FALSE	FALSE	1872	551	563	190
Clostridium chauvoei	bacteria	FALSE	FALSE	458	773	564	626
Anaerobacillus isosaccharinicus	bacteria	TRUE	FALSE	1705.5	1688	565	410
Acinetobacter calcoaceticus	bacteria	TRUE	TRUE	429	974	566	828
Bernardetia litoralis	bacteria	TRUE	FALSE	379	779	567	970
Mycoplasma sp. Mirounga ES2806-GEN	bacteria	FALSE	FALSE	2866	2925	568	437
Cloacibacterium normanense	bacteria	TRUE	TRUE	1106	1236	569	1106
Methylorubrum populi	bacteria	TRUE	TRUE	1192	1559	570	5377
Lactobacillus sakei	bacteria	FALSE	FALSE	280	369	571.5	175
Corynebacterium minutissimum	bacteria	TRUE	FALSE	1763	240	571.5	386
Massilia sp. WG5	bacteria	TRUE	TRUE	2535.5	2768	573	5377
Fusobacterium canifelinum	bacteria	FALSE	FALSE	735	1041	574	826
Alloprevotella sp. E39	bacteria	FALSE	FALSE	2625	110	575	349
Sporosarcina ureilytica	bacteria	TRUE	FALSE	2799	2835	576	599
Dolosigranulum pigrum	bacteria	TRUE	TRUE	1280	767	577	221
Anaeromyxobacter dehalogenans	bacteria	TRUE	FALSE	641	1024	578	5377
Shigella boydii	bacteria	FALSE	TRUE	6929.5	7207	579	5377
Bacteroides coprosuis	bacteria	TRUE	FALSE	829	459	580	368
Flammeovirga sp. MY04	bacteria	FALSE	FALSE	250	325	581	801
Brevibacillus brevis	bacteria	TRUE	FALSE	351	588	582	422
Acinetobacter haemolyticus	bacteria	FALSE	TRUE	26	40	583	1015
Sebaldella termitidis	bacteria	FALSE	FALSE	495	936	585	1097
Mycoplasma arginini	bacteria	FALSE	FALSE	1754	2420	585	469
Formosa sp. L2A11	bacteria	TRUE	FALSE	723	1123	585	778
Lacinutrix venerupis	bacteria	TRUE	FALSE	1137	1168	587	1052
Seonamhaeicola sp. S2-3	bacteria	TRUE	FALSE	638	900	588	1134
Gimesia aquarii	bacteria	TRUE	FALSE	1862.5	2129	589	2335.5
Kroppenstedtia eburnea	bacteria	TRUE	FALSE	3277.5	3096.5	590	2220.5
Haemophilus influenzae	bacteria	TRUE	TRUE	279	370	591	652
Chryseobacterium sp. POL2	bacteria	TRUE	FALSE	1238	970.5	592	905
Acinetobacter sp. MYb10	bacteria	TRUE	TRUE	3156	3986.5	593	1191
Lelliottia amnigena	bacteria	TRUE	TRUE	2689	2573	594	5377
Lactobacillus amylovorus	bacteria	FALSE	FALSE	851	693	595	345
Caloramator sp. E03	bacteria	TRUE	FALSE	553	737	596	740
Lactobacillus acetotolerans	bacteria	FALSE	FALSE	1818	1782	597	481
Polaribacter sp. SA4-12	bacteria	FALSE	FALSE	439	829	598	1228
Spiroplasma litorale	bacteria	FALSE	FALSE	1266	2368.5	599	892
Corynebacterium kroppenstedtii	bacteria	TRUE	TRUE	2143	476	600	671
Aquimarina sp. BL5	bacteria	FALSE	FALSE	393	579	601	992
Chamaesiphon minutus	bacteria	FALSE	FALSE	69	175	602.5	1507
Chryseobacterium camelliae	bacteria	TRUE	FALSE	1749	2128	602.5	1435
Chryseobacterium sp. G0201	bacteria	FALSE	FALSE	759	1073	604	1287
Chryseobacterium indoltheticum	bacteria	TRUE	FALSE	660	723	605	1298
Gottschalkia acidurici	bacteria	FALSE	FALSE	248	425	606	819
Streptococcus respiraculi	bacteria	FALSE	FALSE	2292	703	607	270
Cupriavidus taiwanensis	bacteria	FALSE	TRUE	28	45	608	1999
Vibrio parahaemolyticus	bacteria	FALSE	FALSE	155	276	609	915
Flavobacterium faecale	bacteria	TRUE	FALSE	1010	1248	610	709
Paracoccus mutanolyticus	bacteria	FALSE	FALSE	273	623	611	5377
Klebsiella huaxiensis	bacteria	TRUE	FALSE	3634	4531	612	5377
Phyllobacterium sp. 628	bacteria	TRUE	TRUE	3084	4276	613	1641
Hungateiclostridium clariflavum	bacteria	TRUE	FALSE	494	592	614	982
Aquimarina sp. AD1	bacteria	TRUE	FALSE	571	941	615	1081
Bradyrhizobium sp. BTAi1	bacteria	TRUE	TRUE	3288.5	3554	616	1651
Brachyspira murdochii	bacteria	FALSE	FALSE	252	487	617	1174
Sporosarcina ureae	bacteria	FALSE	FALSE	39	81	618	239
Flavobacterium sp. MDT1-60	bacteria	FALSE	FALSE	387	754	619	1021
Carnobacterium sp. CP1	bacteria	TRUE	FALSE	1750	1269	620	209
Lachnoclostridium phytofermentans	bacteria	FALSE	FALSE	303	534	621	889
Clostridium aceticum	bacteria	TRUE	FALSE	1066	1060	622	965.5
Chryseobacterium gleum	bacteria	TRUE	FALSE	512	671	623	1336
Kinneretia sp. DAIF2	bacteria	FALSE	FALSE	45	107	624	5377
Moorea producens	bacteria	FALSE	TRUE	436	781	625	1458
Ruminiclostridium sp. MA18	bacteria	FALSE	FALSE	577	620	626	689
Aerococcus viridans	bacteria	TRUE	FALSE	4218.5	1664	627	276
Clostridium drakei	bacteria	FALSE	FALSE	415	787	628	1060
[Mycobacterium] stephanolepidis	bacteria	TRUE	TRUE	6929.5	4913	629	1828
Streptococcus acidominimus	bacteria	TRUE	FALSE	3338	725	630	265
Virgibacillus sp. MSP4-1	bacteria	TRUE	FALSE	1984	1909	631	391
Bacteroides thetaiotaomicron	bacteria	TRUE	FALSE	406	118	632.5	480
Peribacillus asahii	bacteria	TRUE	FALSE	708	1219	632.5	519
Lysinibacillus fusiformis	bacteria	TRUE	FALSE	462	798	634	364
Barnesiella viscericola	bacteria	FALSE	FALSE	1871	191	636	472
Bacillus sp. DSL-17	bacteria	TRUE	FALSE	301	568	636	687
Flavobacterium sp. KBS0721	bacteria	FALSE	FALSE	408	745	636	1041
Myroides phaeus	bacteria	TRUE	FALSE	911	1478	638	1533
Leptotrichia buccalis	bacteria	FALSE	FALSE	421	570	639	927
Flavobacterium branchiophilum	bacteria	FALSE	TRUE	601	831	640	1264
Streptomyces lydicus	bacteria	TRUE	FALSE	360	524	641	5377
Chitinophaga sp. H33E-04	bacteria	TRUE	FALSE	1118	882	642	1096
Riemerella anatipestifer	bacteria	TRUE	FALSE	448	490	643	930
Algibacter sp. L1A34	bacteria	TRUE	FALSE	537	793	644	1373.5
Thermus thermophilus	bacteria	TRUE	TRUE	572	980	645	5377
Erysipelatoclostridium ramosum	bacteria	FALSE	FALSE	824	833	646.5	474
Halanaerobium praevalens	bacteria	FALSE	FALSE	413	713	646.5	708
Ornithobacterium rhinotracheale	bacteria	FALSE	FALSE	404	447	648	1085
Aliarcobacter faecis	bacteria	FALSE	FALSE	648	1910	649	1652
Flavobacterium anhuiense	bacteria	TRUE	FALSE	691	930	650	731
Streptococcus pluranimalium	bacteria	TRUE	FALSE	1991	678	651	177
Staphylococcus virus IPLA5	virus_DNAbacteria	FALSE	FALSE	6929.5	7207	652	803
Mycoplasma bovirhinis	bacteria	TRUE	FALSE	1720.5	2081	653	625
Arcobacter ellisii	bacteria	FALSE	FALSE	689	1348	654.5	1182
Polaribacter sp. ALD11	bacteria	TRUE	FALSE	625	960	654.5	1108
Urechidicola croceus	bacteria	TRUE	FALSE	624	846	656	786
Klebsiella quasipneumoniae	bacteria	TRUE	TRUE	416	902	657	1023
Mycoplasma sp. OR1901	bacteria	FALSE	FALSE	1357	1788	658	516
Lutibacter profundi	bacteria	TRUE	FALSE	704	896	659	965.5
Candidatus Pelagibacter sp. FZCC0015	bacteria	FALSE	FALSE	2525.5	2745	660	1212
Viridibacillus sp. JNUCC-6	bacteria	TRUE	FALSE	558	985	661	510
Lysinibacillus sp. 2017	bacteria	TRUE	FALSE	1172	1674	662	497
Arcobacter aquimarinus	bacteria	TRUE	FALSE	762	1778	663	1565
Ureibacillus thermosphaericus	bacteria	TRUE	FALSE	1562	1498	664	309
Brachyspira hampsonii	bacteria	FALSE	FALSE	475	1121	665	752
Staphylococcus virus St134	virus_DNAbacteria	FALSE	FALSE	6929.5	7207	666	1207
Halobacteroides halobius	bacteria	FALSE	FALSE	852	1243	667	669
Cyanobacterium aponinum	bacteria	FALSE	FALSE	733	1521	668	1206
Streptomyces venezuelae	bacteria	TRUE	FALSE	218	362	669.5	476
Flavobacterium gilvum	bacteria	TRUE	FALSE	891	1122	669.5	1342
Jeotgalibaca porci	bacteria	FALSE	FALSE	497	464	671	197
Francisella tularensis	bacteria	FALSE	FALSE	522	765	672	1214
Streptococcus ferus	bacteria	TRUE	FALSE	3228	1169	673	231
Clostridium sp. JN-9	bacteria	FALSE	FALSE	384	613	674	674
Vibrio vulnificus	bacteria	TRUE	FALSE	401	660	675	1064
Paenibacillus crassostreae	bacteria	TRUE	FALSE	1690	1159	676	321
Flavobacterium alkalisoli	bacteria	TRUE	FALSE	1281	802	677	1447
Pseudopedobacter saltans	bacteria	TRUE	FALSE	1069	886	678	960
Arcobacter venerupis	bacteria	FALSE	FALSE	647	1507	679	1062.5
Aquabacterium olei	bacteria	TRUE	TRUE	835	2856	680	5377
Polaribacter sp. SA4-10	bacteria	TRUE	FALSE	487	1002	682	1335
Monoglobus pectinilyticus	bacteria	FALSE	FALSE	731	1078	682	663
Formosa sediminum	bacteria	FALSE	FALSE	515	884	682	1403
Bifidobacterium longum	bacteria	TRUE	FALSE	1334	322	684	468
Streptomyces tendae	bacteria	TRUE	FALSE	2764.5	3581	685	5377
Malaciobacter halophilus	bacteria	FALSE	FALSE	548	993	686	957
Borrelia miyamotoi	bacteria	FALSE	FALSE	43	79	687	1334
Staphylococcus delphini	bacteria	TRUE	FALSE	2791	2493	688.5	227
Sphingopyxis macrogoltabida	bacteria	TRUE	TRUE	3094	2253	688.5	5377
Geminocystis sp. NIES-3709	bacteria	FALSE	FALSE	780	1490	690	1120
Phocaeicola dorei	bacteria	TRUE	FALSE	751	131	691	428
Erysipelothrix rhusiopathiae	bacteria	FALSE	FALSE	1870	680	692	426
Capnocytophaga canimorsus	bacteria	TRUE	FALSE	674	309	693.5	668
Clostridium formicaceticum	bacteria	FALSE	FALSE	223	481	693.5	894
Mycoplasma anserisalpingitidis	bacteria	FALSE	FALSE	971	1876	695	692
Arcobacter skirrowii	bacteria	FALSE	TRUE	600	1325	696	1177
Maribacter sp. MJ134	bacteria	FALSE	FALSE	1621	1131	697	1061
Chryseobacterium arthrosphaerae	bacteria	TRUE	TRUE	1526	1696	698	1442
Enterobacteriaceae endosymbiont of Plateumaris braccata	bacteria	FALSE	FALSE	3769	4864.5	699	5377
Bacillus cohnii	bacteria	TRUE	FALSE	573	907	700	405
Tenacibaculum jejuense	bacteria	TRUE	FALSE	578	783	701	888
Polaribacter sp. L12M9	bacteria	TRUE	FALSE	639	893	702	880
Spiroplasma helicoides	bacteria	FALSE	FALSE	1012	2543	703	1262
Flavobacterium sp. Sr18	bacteria	FALSE	FALSE	1136	1230	704	1432.5
Arcobacter cibarius	bacteria	TRUE	FALSE	474	1083	706	1265.5
Paraglaciecola sp. L3A3	bacteria	FALSE	FALSE	1321	2193	706	1659
Agarilytica rhodophyticola	bacteria	FALSE	FALSE	858	1581	706	1566
Ralstonia solanacearum	bacteria	FALSE	TRUE	24	39	708	1276
Arcobacter thereius	bacteria	FALSE	TRUE	1077	2187	709	1562
Lactobacillus apis	bacteria	TRUE	FALSE	3245	1011	710	387
Fusobacterium sp. oral taxon 203	bacteria	FALSE	FALSE	982	969	711	1292
Paraburkholderia caffeinilytica	bacteria	TRUE	TRUE	3379	4031	712	5377
Solimonas sp. K1W22B-7	bacteria	TRUE	TRUE	2088	2542	713	1632
Neobacillus cucumis	bacteria	TRUE	FALSE	1189	1220	714	414
Arcobacter nitrofigilis	bacteria	FALSE	FALSE	468	1272	715	1313
Bacillus cellulosilyticus	bacteria	FALSE	FALSE	385	681	716	485
Candidatus Prometheoarchaeum syntrophicum	archaea	FALSE	FALSE	2419	3821	717.5	1408
Oceanobacillus kimchii	bacteria	TRUE	FALSE	964	953	717.5	365
Polaribacter vadi	bacteria	TRUE	FALSE	608	1021	719	1073
Campylobacter hepaticus	bacteria	FALSE	FALSE	1850	2672	720	325
Bifidobacterium dentium	bacteria	TRUE	FALSE	1970	574	721	1158
Gloeothece citriformis	bacteria	TRUE	FALSE	1054	1956	722	1272
Alcaligenes faecalis	bacteria	TRUE	FALSE	792	768	723	1358
Desulfosporosinus meridiei	bacteria	TRUE	FALSE	2715	1668.5	724	1263
Polaribacter sp. L3A8	bacteria	FALSE	FALSE	656	1094	725.5	1384.5
Pseudomonas azotoformans	bacteria	TRUE	TRUE	2864	3407.5	725.5	5377
Acinetobacter nosocomialis	bacteria	TRUE	TRUE	1195	1450	727	1362
Shewanella baltica	bacteria	TRUE	TRUE	1381	1297	728	1380
Achromobacter deleyi	bacteria	TRUE	TRUE	814	4581	729	2207.5
Klebsiella michiganensis	bacteria	TRUE	TRUE	1773	1052	730	717.5
Geminocystis sp. NIES-3708	bacteria	FALSE	FALSE	588	1439	731	1267
Dietzia sp. oral taxon 368	bacteria	TRUE	TRUE	2301	1741	732	1348
Moorella thermoacetica	bacteria	TRUE	FALSE	3715	3522	733	2184
Aminipila sp. CBA3637	bacteria	FALSE	FALSE	802	814	734	775
Orpheovirus IHUMI-LCC2	virus_DNAother	FALSE	FALSE	2840.5	4976	735	2054
Pseudomonas synxantha	bacteria	TRUE	FALSE	795	1811	736	2133
Cryptococcus gattii VGI	fungi	FALSE	FALSE	325	1022	737	1549
Paracoccus yeei	bacteria	TRUE	TRUE	3750.5	2804	738	5377
Nitrososphaera viennensis	archaea	FALSE	FALSE	430	1259	739	5377
Aerococcus christensenii	bacteria	FALSE	FALSE	696	577	740	255
Polaribacter reichenbachii	bacteria	TRUE	FALSE	527	1035	741	1317
Arachidicoccus sp. B3-10	bacteria	TRUE	FALSE	612	692	742	1016
Chryseobacterium sp. T16E-39	bacteria	FALSE	FALSE	844	1261	743	1321.5
Listeria welshimeri	bacteria	TRUE	FALSE	1654	1935	744	400
Acinetobacter schindleri	bacteria	TRUE	TRUE	535	1195	745	1515
cyanobacterium endosymbiont of Epithemia turgida	bacteria	FALSE	FALSE	1213	2429	746	2028.5
Gardnerella vaginalis	bacteria	TRUE	FALSE	682	254	747	277
Mycoplasma californicum	bacteria	FALSE	FALSE	1496	2430.5	748	864
Mycoplasma bovigenitalium	bacteria	FALSE	FALSE	1748	2382	749	614
Peribacillus butanolivorans	bacteria	TRUE	FALSE	229	927	750	688
Candidatus Endolissoclinum faulkneri	bacteria	FALSE	FALSE	1374	1854	751	1381
Klebsiella variicola	bacteria	FALSE	FALSE	4	5	752	981
Fastidiosipila sanguinis	bacteria	FALSE	FALSE	1031	271	753	273
Adhaeribacter swui	bacteria	TRUE	FALSE	874	1160	754	1153
Malaciobacter molluscorum	bacteria	FALSE	FALSE	321	763	755	1364
Lactobacillus gastricus	bacteria	TRUE	FALSE	4287	1847	756	398
Candidatus Syntrophocurvum alkaliphilum	bacteria	FALSE	FALSE	816	1292	757	1202
Olleya aquimaris	bacteria	TRUE	FALSE	1034	1200.5	758	1323
Mucilaginibacter rubeus	bacteria	TRUE	FALSE	933	500	759	658
Spiroplasma turonicum	bacteria	FALSE	FALSE	1260.5	2283	760	1293
Microchaete diplosiphon	bacteria	TRUE	FALSE	1820	2848	761	1243.5
Pseudoarcobacter acticola	bacteria	FALSE	FALSE	538	959	762	1318.5
Leptotrichia hongkongensis	bacteria	FALSE	FALSE	1015	1093	763	1137
Psychroflexus torquis	bacteria	TRUE	FALSE	1302	1036.5	764	1149
Mariniflexile sp. TRM1-10	bacteria	FALSE	TRUE	801	876	765	1320
Bacillus sp. Y1	bacteria	TRUE	FALSE	840	1126	766	528
Collinsella aerofaciens	bacteria	TRUE	FALSE	2705	171	767	176
Rivularia sp. PCC 7116	bacteria	FALSE	FALSE	378	734	768	1420
Treponema denticola	bacteria	FALSE	FALSE	574	189	769	550
Lonsdalea britannica	bacteria	TRUE	TRUE	4305	4326	770	5377
Calothrix sp. NIES-2098	bacteria	FALSE	TRUE	296	697	771	814
Streptomyces cattleya	bacteria	TRUE	FALSE	1489	1904	772	5377
Methanosarcina mazei	archaea	FALSE	FALSE	2350	3557	773	1799
Mycoplasma citelli	bacteria	FALSE	FALSE	1997	2519	774	811
Rhizobium leguminosarum	bacteria	TRUE	TRUE	405	463	775	1186
Mucilaginibacter mallensis	bacteria	FALSE	TRUE	168	341	776	1627
Raoultella ornithinolytica	bacteria	TRUE	TRUE	519	728	777	5377
Chroococcidiopsis thermalis	bacteria	TRUE	FALSE	2091	2634	778	1111
Neisseria mucosa	bacteria	TRUE	FALSE	3194	2220	779	1483
Peribacillus simplex	bacteria	TRUE	FALSE	187	486	780	384
Bacillus ciccensis	bacteria	TRUE	FALSE	376	743	781	618
Candidatus Pelagibacter sp. RS39	bacteria	FALSE	FALSE	2244	3647	782	1960.5
Vagococcus zengguangii	bacteria	TRUE	FALSE	2724.5	1288	783	185
Staphylococcus sp. MI 10-1553	bacteria	TRUE	FALSE	2901	1998.5	784	207
Borrelia crocidurae	bacteria	FALSE	FALSE	120	302	785	2300
Silvanigrella aquatica	bacteria	FALSE	FALSE	761	1506	786	1232
Thermotoga sp. RQ2	bacteria	FALSE	TRUE	6929.5	7207	787	5377
Caulobacter vibrioides	bacteria	TRUE	TRUE	1734.5	2110	788	2350.5
Serratia fonticola	bacteria	FALSE	TRUE	68	160	789	1527.5
Methylobacterium brachiatum	bacteria	TRUE	TRUE	3611.5	3999	790	5377
Methylobacterium nodulans	bacteria	TRUE	TRUE	1827	2763	791	5377
Mycoplasma columbinum	bacteria	FALSE	FALSE	2060	3008.5	792	604
Komagataeibacter rhaeticus	bacteria	FALSE	TRUE	31	52	793	2160
Alkalihalobacillus krulwichiae	bacteria	TRUE	FALSE	1666	1118	794	305
Achromobacter spanius	bacteria	TRUE	TRUE	1025	1362	795	1560.5
Ralstonia pickettii	bacteria	TRUE	TRUE	3208	949	796	1994
Microbacterium aurum	bacteria	TRUE	TRUE	4456	3504	797	2093
Pluralibacter gergoviae	bacteria	TRUE	TRUE	310	624	798	5377
Solibacillus silvestris	bacteria	TRUE	FALSE	945	663	799	390
Mycoplasma mobile	bacteria	FALSE	FALSE	2355	2513	800	998
Stanieria sp. NIES-3757	bacteria	FALSE	FALSE	1216	2078	801	1268
Malaciobacter canalis	bacteria	FALSE	FALSE	320	641	802	1321.5
Tenacibaculum sp. SZ-18	bacteria	FALSE	FALSE	642	1055	803	1369
Virgibacillus sp. Bac332	bacteria	TRUE	FALSE	1011	1371	804	534
Metabacillus sp. KUDC1714	bacteria	TRUE	FALSE	441	694	805	572
Flavobacterium indicum	bacteria	TRUE	FALSE	1065	935	806	1550
Mycoplasma capricolum	bacteria	FALSE	FALSE	960	1650	807	1291
Changchengzhania lutea	bacteria	TRUE	FALSE	1215	1349	808	1490
Chryseobacterium carnipullorum	bacteria	TRUE	FALSE	1113	1001	809	1205
Cytophaga hutchinsonii	bacteria	FALSE	FALSE	928	1056	810	1141
Halocella sp. SP3-1	bacteria	FALSE	FALSE	551	925	811	964
Influenza A virus	virus_RNAvertebrates	FALSE	FALSE	6929.5	7207	812	2119.5
Acinetobacter indicus	bacteria	TRUE	TRUE	1316	1644	813	1366
Mycoplasma cynos	bacteria	FALSE	FALSE	1740	2457	814.5	885
Campylobacter fetus	bacteria	FALSE	FALSE	602	1104	814.5	1156
Acidianus brierleyi	archaea	FALSE	FALSE	2693	4287	816	1736.5
Lactobacillus graminis	bacteria	FALSE	FALSE	2622.5	2399	817	336
Campylobacter canadensis	bacteria	TRUE	FALSE	650	1406	818	1275
Tenacibaculum maritimum	bacteria	TRUE	FALSE	663	908	819	1003
Mycoplasma sp. C264-NAS	bacteria	FALSE	FALSE	2214.5	3310	820	797
Atlantibacter hermannii	bacteria	FALSE	TRUE	3701	2645.5	821	1645.5
Cupriavidus basilensis	bacteria	TRUE	TRUE	237	501	822	5377
Mycoplasma sp. NEAQ87857	bacteria	TRUE	FALSE	1509	2441	823	1087
Mycoplasma felis	bacteria	TRUE	FALSE	1362	2640.5	824	972.5
Lacinutrix sp. 5H-3-7-4	bacteria	TRUE	FALSE	763	1064.5	825	1476
Arcobacter suis	bacteria	FALSE	FALSE	804	1922	826	1240
Campylobacter hyointestinalis	bacteria	FALSE	FALSE	491	1106	827	1032
Anaerostipes hadrus	bacteria	FALSE	FALSE	873	488	828	458
Microbacterium sp. ABRD_28	bacteria	TRUE	TRUE	3737	2674	829	5377
Haliangium ochraceum	bacteria	TRUE	FALSE	1707	1335	830	5377
Dyella japonica	bacteria	TRUE	FALSE	3661	4307	831	5377
Streptomyces lunaelactis	bacteria	TRUE	FALSE	1603	2540	832	5377
Schnuerera ultunensis	bacteria	FALSE	FALSE	709	832	833	967
Algibacter alginicilyticus	bacteria	TRUE	FALSE	725	990	834	1344
Polynucleobacter necessarius	bacteria	FALSE	FALSE	30	47	835	823
Cupriavidus metallidurans	bacteria	TRUE	FALSE	2488	2685	836	1508
Torulaspora globosa	fungi	FALSE	FALSE	3728.5	4508.5	837.5	1091
secondary endosymbiont of Heteropsylla cubana	bacteria	FALSE	FALSE	1141	1752	837.5	1440
Malaciobacter marinus	bacteria	FALSE	FALSE	1196	2517	839	907
Chryseobacterium balustinum	bacteria	TRUE	FALSE	651	1161	840.5	1854
Paraliobacillus zengyii	bacteria	TRUE	FALSE	1020	1290	840.5	434
Acidovorax sp. JMULE5	bacteria	TRUE	TRUE	3037	3372.5	842	5377
Bacillus safensis	bacteria	TRUE	FALSE	1868	2594	843	679
Ilyobacter polytropus	bacteria	FALSE	FALSE	778	1147	844	1022
Bradyrhizobium sp. SK17	bacteria	TRUE	TRUE	2913.5	3175	845	5377
Lactobacillus bifermentans	bacteria	TRUE	FALSE	4464.5	2138	846	267
Empedobacter falsenii	bacteria	TRUE	FALSE	727	885	847	1048
Morganella morganii	bacteria	TRUE	TRUE	1718	1417	848.5	1460.5
Zunongwangia profunda	bacteria	TRUE	FALSE	1295	1367	848.5	1176
Chitinophaga pinensis	bacteria	TRUE	TRUE	342	267	850	843
Herbinix luporum	bacteria	TRUE	FALSE	1211	910	851	1046
Amedibacterium intestinale	bacteria	FALSE	FALSE	453	637	852	698
Acholeplasma laidlawii	bacteria	FALSE	FALSE	2062	1985	853	1301
Runella sp. SP2	bacteria	FALSE	FALSE	182	347	854	745
Xenorhabdus bovienii	bacteria	FALSE	FALSE	1317	1705	855	1472.5
cyanobacterium endosymbiont of Rhopalodia gibberula	bacteria	FALSE	FALSE	771	1979	856	895
Fischerella sp. NIES-4106	bacteria	FALSE	FALSE	633	1322	857	1373.5
Kurthia sp. 11kri321	bacteria	TRUE	FALSE	1798	1350	858	282
Legionella sainthelensi	bacteria	TRUE	FALSE	825	1221	859	1397
Flavobacterium psychrophilum	bacteria	TRUE	FALSE	754	1196	860	1192
Chryseobacterium gallinarum	bacteria	TRUE	FALSE	983	691	861	902
Streptomyces collinus	bacteria	TRUE	FALSE	1207.5	2449.5	862	5377
Hungateiclostridium saccincola	bacteria	TRUE	FALSE	604	796	863	866
Methylobacterium sp. 4-46	bacteria	TRUE	TRUE	2920	3077	864	5377
Bacillus weihaiensis	bacteria	TRUE	FALSE	919	1329	865	552
Geosporobacter ferrireducens	bacteria	FALSE	FALSE	717	932	866.5	407
Elizabethkingia meningoseptica	bacteria	FALSE	FALSE	987	1300	866.5	1540
Anaerocolumna sp. CTTW	bacteria	FALSE	FALSE	869	664	868	806
Clostridium thermarum	bacteria	FALSE	FALSE	1091	1182	869	720
Bacillus albus	bacteria	TRUE	FALSE	2611	3122	870	1674
Metabacillus litoralis	bacteria	TRUE	FALSE	541	1137	871	667
Microvirga ossetica	bacteria	TRUE	FALSE	2662	2332	872	5377
Sulfurihydrogenibium sp. YO3AOP1	bacteria	TRUE	FALSE	749	2269	873	1868.5
Gramella sp. MAR_2010_147	bacteria	FALSE	FALSE	2057	2385	874	1970.5
Sulfurimonas denitrificans	bacteria	TRUE	FALSE	2114	2737	875	1957
Sulfurisphaera tokodaii	archaea	FALSE	FALSE	3118	4323	876	733
Legionella israelensis	bacteria	FALSE	FALSE	50	99	877	1210
endosymbiont 'TC1' of Trimyema compressum	bacteria	FALSE	FALSE	1537	2645.5	878	1165
Maribacter sp. T28	bacteria	TRUE	FALSE	1723	1233	879	1290
Flavobacterium sp. I3-2	bacteria	TRUE	FALSE	659	853	880	891
Jeotgalicoccus saudimassiliensis	bacteria	TRUE	FALSE	2351	2507	881	373
Caminibacter mediatlanticus	bacteria	FALSE	FALSE	855	1270	882	1026
Candidatus Liberibacter americanus	bacteria	FALSE	FALSE	2839	3805	883	1974
Nostoc sphaeroides	bacteria	TRUE	FALSE	672	1786	884	1598.5
Flavobacterium sp. M31R6	bacteria	TRUE	FALSE	701	1081	885	1392.5
Agrobacterium vitis	bacteria	TRUE	TRUE	2345	1804	886	1438
Streptococcus pantholopis	bacteria	FALSE	FALSE	3149.5	928	887	347
Arcobacter cloacae	bacteria	FALSE	FALSE	790	2230	888	1703
Chryseobacterium joostei	bacteria	TRUE	FALSE	657	914	889	1780
Acinetobacter oleivorans	bacteria	TRUE	TRUE	2916	4817	890	991
Flavobacterium commune	bacteria	TRUE	FALSE	943	1028	891	1499.5
Malaciobacter pacificus	bacteria	FALSE	FALSE	740	1614	892.5	1257
Acholeplasma hippikon	bacteria	FALSE	FALSE	1964.5	1799	892.5	478
Marinilactibacillus sp. 15R	bacteria	TRUE	FALSE	1478	1295	894	230
Lactobacillus coryniformis	bacteria	TRUE	FALSE	2352	992	895	219
Photorhabdus asymbiotica	bacteria	FALSE	TRUE	1101	1684.5	896	1552
Polaromonas sp. JS666	bacteria	TRUE	TRUE	1105	1421	897	5377
Tenacibaculum mesophilum	bacteria	TRUE	FALSE	898	1132	898	1641
Pandoravirus macleodensis	virus_DNAother	FALSE	FALSE	1559	3285	899	5377
Flavobacterium nitrogenifigens	bacteria	TRUE	FALSE	906	821	900	1368
Rhodococcus fascians	bacteria	TRUE	TRUE	2867	1407	901	2144
Mycoplasma neurolyticum	bacteria	TRUE	FALSE	1901	3560	902	912
Polaribacter haliotis	bacteria	TRUE	FALSE	611	1164	903	1080
Mycobacteroides abscessus	bacteria	TRUE	TRUE	984	820	904.5	1664
Campylobacter coli	bacteria	FALSE	FALSE	557	863	904.5	1150.5
Candidatus Fonsibacter ubiquis	bacteria	TRUE	FALSE	1705.5	2443	906	1785.5
Mesobacillus foraminis	bacteria	TRUE	FALSE	561	869	907	657
Candidatus Portiera aleyrodidarum	bacteria	FALSE	FALSE	414	1103	908	2055
Capnocytophaga sp. oral taxon 878	bacteria	TRUE	FALSE	719	223	909	576
Candidatus Sulcia muelleri	bacteria	FALSE	FALSE	803	1398	910	1188
Enterococcus sp. FDAARGOS_375	bacteria	TRUE	FALSE	4648	2254	911	206
Paenisporosarcina antarctica	bacteria	TRUE	FALSE	1452	2153	912	779
Deferribacter desulfuricans	bacteria	FALSE	FALSE	452	891	913	1071.5
Corynebacterium glaucum	bacteria	TRUE	TRUE	1491	735	914	433
Calothrix parietina	bacteria	FALSE	FALSE	1384	2651	915	1109
Bacillus sp. HD4P25	bacteria	TRUE	FALSE	349	675	916	586
Elusimicrobium minutum	bacteria	FALSE	FALSE	2031.5	2347	917	1775.5
Lactobacillus kefiranofaciens	bacteria	FALSE	FALSE	1859	1000	918	517
Acinetobacter defluvii	bacteria	TRUE	TRUE	1434	2411	919	1715.5
Bacillus cytotoxicus	bacteria	TRUE	FALSE	523	1031	920	457
Calothrix sp. 336/3	bacteria	FALSE	FALSE	688	1242	921	1352
Pseudoleptotrichia goodfellowii	bacteria	FALSE	FALSE	662	1089	922	1059
Haloquadratum walsbyi	archaea	FALSE	TRUE	3277.5	4473.5	923	5377
Campylobacter insulaenigrae	bacteria	FALSE	FALSE	1314.5	2604	924	1445
Listeria ivanovii	bacteria	TRUE	FALSE	679	679	925	389
Winogradskyella forsetii	bacteria	TRUE	FALSE	442	593	926.5	1543
Polaribacter sp. Hel1_33_78	bacteria	TRUE	FALSE	774	1332	926.5	1324.5
Bacillus gobiensis	bacteria	TRUE	FALSE	1536	2108	928.5	715
Comamonas sp. NLF-7-7	bacteria	TRUE	FALSE	4266	2767	928.5	5377
Chryseobacterium bernardetii	bacteria	TRUE	FALSE	817	1063	930	1477
Cytobacillus kochii	bacteria	TRUE	FALSE	628	1134	931	500
Nocardioides sp. 603	bacteria	TRUE	FALSE	2145	2572	932	5377
Streptomyces sp. TN58	bacteria	TRUE	FALSE	2004	2645.5	933	5377
Chryseobacterium lactis	bacteria	TRUE	FALSE	809	1113	934	776
Clostridium sp. BNL1100	bacteria	FALSE	FALSE	939	1141	935.5	1166
Candidatus Nitrosocosmicus hydrocola	archaea	FALSE	FALSE	1446	2921	935.5	2303.5
Acinetobacter sp. WCHA45	bacteria	TRUE	TRUE	1554	2189	937	1725
Aliivibrio fischeri	bacteria	FALSE	FALSE	668	1337	938	1241
Sulfolobus islandicus	archaea	FALSE	FALSE	2249	4072	939	1551
Halothermothrix orenii	bacteria	FALSE	FALSE	764	1178	940	942
Spiroplasma corruscae	bacteria	FALSE	FALSE	1363	2458	941	1641
Kurthia zopfii	bacteria	TRUE	FALSE	1286	1309	942	413
Spiroplasma tabanidicola	bacteria	FALSE	FALSE	1001	2607	943	1089
Chryseobacterium sp. IHB B 17019	bacteria	FALSE	FALSE	831	1049	944	1483
Streptomyces ficellus	bacteria	TRUE	FALSE	2027	2570	945	5377
Ruminococcus sp. JE7A12	bacteria	FALSE	FALSE	815	730	946	456
Vibrio campbellii	bacteria	FALSE	FALSE	272	601	947	1766
Calothrix brevissima	bacteria	FALSE	FALSE	745	1794	948	1861
Mycoplasma sp. Pen4	bacteria	FALSE	FALSE	2934	2800	949	858
Stenotrophomonas rhizophila	bacteria	TRUE	TRUE	2113	2505	950	5377
Rahnella sp. ERMR1:05	bacteria	TRUE	FALSE	3703	3563	951	5377
Roseivirga pacifica	bacteria	TRUE	FALSE	1083	964.5	952	1035.5
Leclercia adecarboxylata	bacteria	TRUE	TRUE	605	1120	953	1770
Acholeplasma palmae	bacteria	TRUE	FALSE	857	1462	954	1101
Methylobacterium sp. 17Sr1-43	bacteria	TRUE	TRUE	979	1697	955	5377
Tenacibaculum todarodis	bacteria	TRUE	FALSE	890	1110	956	1460.5
Streptomyces sp. SYP-A7193	bacteria	TRUE	FALSE	1467.5	2758	957.5	5377
Oceanobacillus sp. 160	bacteria	TRUE	FALSE	1074	1366	957.5	439
Apibacter raozihei	bacteria	FALSE	FALSE	476	878	959	1288
Acinetobacter equi	bacteria	TRUE	TRUE	1052	1889	960	1489
Nostoc carneum	bacteria	FALSE	TRUE	1341	2864	961.5	1233
Acinetobacter sp. Marseille-Q1620	bacteria	FALSE	TRUE	575	1318	961.5	1416
Arsenophonus nasoniae	bacteria	FALSE	FALSE	1038	1456	963	1567
Comamonas thiooxydans	bacteria	TRUE	TRUE	4087	4738	964	5377
Chryseobacterium sp. 3008163	bacteria	FALSE	FALSE	142	338	965	1231
Weissella koreensis	bacteria	FALSE	FALSE	2200	2070	966	408
Anaerotignum propionicum	bacteria	FALSE	FALSE	1472	1019	968.5	696
Arcobacter anaerophilus	bacteria	FALSE	FALSE	905	1710	968.5	1560.5
Nautilia sp. PV-1	bacteria	FALSE	FALSE	1271	2256	968.5	1197
Staphylococcus piscifermentans	bacteria	FALSE	FALSE	2081	2512	968.5	301
Mycoplasma dispar	bacteria	FALSE	FALSE	2364	2569	971	1299
Vibrio cholerae	bacteria	TRUE	FALSE	160	219	972	856
Bacillus sp. FJAT-22090	bacteria	TRUE	FALSE	637	780	973	466
Anabaena cylindrica	bacteria	FALSE	FALSE	1102	1263	974	1541
Campylobacter curvus	bacteria	TRUE	FALSE	2254.5	1091	975	1185
Mycoplasma gallopavonis	bacteria	FALSE	FALSE	3027	3918	976	714
Streptomyces hygroscopicus	bacteria	TRUE	FALSE	610	1285	977	5377
Bacillus sp. FJAT-18017	bacteria	TRUE	FALSE	2045	1459	978	1030
Lysinibacillus sp. SGAir0095	bacteria	TRUE	FALSE	1134	1703	979	546
Verminephrobacter eiseniae	bacteria	TRUE	TRUE	2644	2510	980	5377
Lysinibacillus timonensis	bacteria	TRUE	FALSE	949	756	981	584
Undibacterium sp. YM2	bacteria	TRUE	TRUE	3174.5	4462	982	5377
Hahella chejuensis	bacteria	TRUE	FALSE	3221	2806	983	5377
Campylobacter gracilis	bacteria	TRUE	FALSE	2609	194	984	985
Chryseobacterium glaciei	bacteria	FALSE	FALSE	715	1360	985	1387
Flavivirga eckloniae	bacteria	TRUE	FALSE	562	740	986	1229
Pseudomonas entomophila	bacteria	TRUE	TRUE	1412.5	2171	987	5377
Acinetobacter radioresistens	bacteria	TRUE	TRUE	1132	1761	988	1502
[Arcobacter] porcinus	bacteria	FALSE	FALSE	1418	2014	989	1412
Winogradskyella sp. PG-2	bacteria	FALSE	FALSE	896	1077	990.5	1575
Gillisia sp. Hel1_33_143	bacteria	TRUE	FALSE	1115	1057	990.5	1628
Corynebacterium matruchotii	bacteria	TRUE	TRUE	2884.5	472	992	1027
Corynebacterium sp. zg-917	bacteria	TRUE	TRUE	4113	423	993	872
Lactobacillus kullabergensis	bacteria	FALSE	FALSE	938	1154.5	994	463
Streptococcus halotolerans	bacteria	TRUE	FALSE	2991	706	995	274
Niastella koreensis	bacteria	TRUE	TRUE	1146.5	827	996	1348
Plesiomonas shigelloides	bacteria	TRUE	FALSE	2574.5	2015	997	1774
Empedobacter stercoris	bacteria	FALSE	FALSE	1024	1048	998	1246
Bacillus flexus	bacteria	TRUE	FALSE	951	1382	999	607
Polaribacter sp. KT 15	bacteria	FALSE	FALSE	1142	1861	1000	1814.5
Formosa agariphila	bacteria	TRUE	FALSE	950	1033.5	1001	1606
Agrobacterium sp. T29	bacteria	TRUE	TRUE	6929.5	5557.5	1002	5377
Phyllobacterium zundukense	bacteria	TRUE	TRUE	5020	4532	1003	2158
Lactobacillus malefermentans	bacteria	TRUE	FALSE	4912	2095	1004	533
Sodalis endosymbiont of Henestaris halophilus	bacteria	TRUE	FALSE	1857	2757	1005	2308
Mycoplasma pulmonis	bacteria	FALSE	FALSE	1314.5	2422	1006	501
Blattabacterium punctulatus	bacteria	FALSE	FALSE	2094	3029	1007	1602
Bacillus methanolicus	bacteria	TRUE	FALSE	1727	1607	1008	589
Ligilactobacillus agilis	bacteria	TRUE	FALSE	3724	2068	1009	210
Pseudomonas syringae	bacteria	TRUE	TRUE	503	856	1010	1898
Paludibacter propionicigenes	bacteria	FALSE	FALSE	927	334	1011	729
Virgibacillus phasianinus	bacteria	TRUE	FALSE	1582	1662.5	1012	317
Bacteroides intestinalis	bacteria	FALSE	FALSE	863	251	1013	574
Halobacteriovorax marinus	bacteria	FALSE	FALSE	664	1388	1015	1297
Bacillus sp. S3	bacteria	TRUE	FALSE	986	785	1015	505
Leptotrichia hofstadii	bacteria	FALSE	FALSE	470	867	1015	986
Acidianus sulfidivorans	archaea	FALSE	FALSE	3297.5	5009.5	1017	2125
Nostoc linckia	bacteria	FALSE	FALSE	661	1200.5	1018	1475
Crinalium epipsammum	bacteria	FALSE	FALSE	1388	1888	1019	1837
Pedobacter sp. G11	bacteria	TRUE	FALSE	1419	945	1020	936
Mycoplasma hyorhinis	bacteria	FALSE	FALSE	1853	2630	1021	1077
Butyrivibrio fibrisolvens	bacteria	FALSE	FALSE	1022	554	1022	520
Psychroserpens sp. NJDZ02	bacteria	TRUE	FALSE	581	759	1023	1147
Methanococcus voltae	archaea	FALSE	FALSE	4080.5	4771	1024.5	2149.5
Chryseobacterium piperi	bacteria	FALSE	FALSE	955	1646	1024.5	1816
Spiroplasma clarkii	bacteria	FALSE	FALSE	1958	2813.5	1026	1086
Geminocystis herdmanii	bacteria	FALSE	FALSE	1133	1770	1027	1312
Curtobacterium flaccumfaciens	bacteria	TRUE	TRUE	3169	2632	1028	2169
Rothia aeria	bacteria	TRUE	TRUE	3570	211	1029	721
Bacillus sp. 1NLA3E	bacteria	TRUE	FALSE	973	1267	1030	527
Levilactobacillus brevis	bacteria	TRUE	FALSE	1566	1107	1031	303
Lachnospira eligens	bacteria	TRUE	FALSE	1586	557	1032	320
Pantoea agglomerans	bacteria	TRUE	TRUE	1653	1783	1033	1885
Flavobacterium nackdongense	bacteria	TRUE	FALSE	319	478	1034	1790
[Ruminococcus] gnavus	bacteria	TRUE	FALSE	1645	757	1035	616
Blastococcus saxobsidens	bacteria	TRUE	FALSE	2572	2226	1036.5	5377
Nocardioides mesophilus	bacteria	TRUE	FALSE	3330.5	3365.5	1036.5	5377
Alkaliphilus oremlandii	bacteria	FALSE	FALSE	975	1286	1038	1303.5
Mycoplasma sp. Mirounga ES2806-NAS	bacteria	TRUE	FALSE	2002.5	3546.5	1039.5	851
Variovorax sp. HW608	bacteria	TRUE	TRUE	4318	3481.5	1039.5	5377
Acidovorax avenae	bacteria	TRUE	TRUE	914	1670	1041	5377
Chryseobacterium taklimakanense	bacteria	TRUE	FALSE	1370	1135	1042	878
Serratia rubidaea	bacteria	TRUE	FALSE	1734.5	2509	1043	5377
Eubacterium sp. NSJ-61	bacteria	FALSE	FALSE	750	828	1044	954
Antarcticibacterium flavum	bacteria	TRUE	FALSE	1421	1374	1045	1471
Cupriavidus pauculus	bacteria	TRUE	TRUE	1169.5	1280	1046	2207.5
Agrobacterium rhizogenes	bacteria	TRUE	TRUE	6929.5	5255	1047	5377
Janibacter indicus	bacteria	TRUE	FALSE	3670	2349	1048	2425.5
Turicibacter sp. H121	bacteria	FALSE	FALSE	1466	1363.5	1049	781
Entomoplasma somnilux	bacteria	FALSE	FALSE	2380.5	2821	1050	1254
Acinetobacter junii	bacteria	TRUE	TRUE	1405	2218	1051	1568
Cedecea neteri	bacteria	FALSE	TRUE	265	473	1052	1948
Salegentibacter sp. T436	bacteria	TRUE	FALSE	1326.5	1679	1053	1242
Cellulophaga algicola	bacteria	TRUE	FALSE	783	1015	1054	1563
Thermosipho melanesiensis	bacteria	FALSE	FALSE	1300	1883	1055	1488
Arachidicoccus soli	bacteria	TRUE	FALSE	784	1217	1056	1673
Bacteroides zoogleoformans	bacteria	FALSE	FALSE	1048	62	1057	272
Pseudoalteromonas luteoviolacea	bacteria	TRUE	FALSE	697	1138	1058	1039
Staphylococcus fleurettii	bacteria	TRUE	FALSE	2723	1509	1059	240
Providencia rustigianii	bacteria	FALSE	FALSE	1842	2163.5	1060	1904
Anoxybacter fermentans	bacteria	TRUE	FALSE	902	1296	1061	1203
Rummeliibacillus stabekisii	bacteria	TRUE	FALSE	877	1199	1062	455
Lactobacillus amylolyticus	bacteria	TRUE	FALSE	3086	1936	1063	617
Frischella perrara	bacteria	FALSE	FALSE	565	1312	1064	1614
Aerococcus urinaehominis	bacteria	TRUE	FALSE	4245.5	2595	1065	283
Streptomyces niveus	bacteria	TRUE	TRUE	620	1117	1066.5	5377
Mycobacterium paraseoulense	bacteria	TRUE	FALSE	4228	4668.5	1066.5	5377
Lactobacillus oligofermentans	bacteria	FALSE	FALSE	1487	1894	1068	453
Flavobacterium sp. xlx-214	bacteria	TRUE	FALSE	312	552	1069	1221
Helicobacter cetorum	bacteria	FALSE	FALSE	1386	2311	1070	1890
Lacinutrix sp. Bg11-31	bacteria	TRUE	FALSE	705	1075	1071	1132
Candidatus Nitrosomarinus catalina	archaea	FALSE	FALSE	4577	5494	1072	2294
Mycoplasma anatis	bacteria	FALSE	FALSE	1335	2858	1073	1384.5
Adhaeribacter radiodurans	bacteria	TRUE	FALSE	775	749	1074	1196
Nostoc sp. PCC 7524	bacteria	FALSE	FALSE	1030	1759.5	1075	1497
Acinetobacter lactucae	bacteria	TRUE	TRUE	2546.5	4469.5	1076	1743.5
Xenorhabdus nematophila	bacteria	TRUE	FALSE	931	1792	1077	1371
Mycobacterium kansasii	bacteria	TRUE	TRUE	2852	2929	1078	5377
Pedobacter sp. CJ43	bacteria	TRUE	FALSE	1035	840	1079	1413
Variovorax sp. 38R	bacteria	TRUE	TRUE	3090	4080	1080	5377
Kordia sp. SMS9	bacteria	TRUE	FALSE	779	816	1081	1157
Crocosphaera subtropica	bacteria	TRUE	FALSE	1191	1582	1082	1510
Chryseobacterium sp. SNU WT5	bacteria	TRUE	FALSE	1431.5	1392.5	1084	1590
Aneurinibacillus sp. XH2	bacteria	TRUE	FALSE	1404	1725	1084	642
Methanobrevibacter ruminantium	archaea	FALSE	FALSE	3927	4951	1084	2026.5
Candidatus Babela massiliensis	bacteria	FALSE	FALSE	1206	2273	1086	1093
Aeribacillus pallidus	bacteria	TRUE	FALSE	1078	1326.5	1087	653
Bacillus sp. X1(2014)	bacteria	TRUE	FALSE	1576	2094	1088	581
Acidianus manzaensis	archaea	FALSE	FALSE	2540.5	3847	1089	1592
Sphingobacterium sp. ML3W	bacteria	TRUE	FALSE	1173	1018	1090.5	1162
Tetragenococcus osmophilus	bacteria	TRUE	FALSE	2438	1326.5	1090.5	223
Spiroplasma gladiatoris	bacteria	FALSE	FALSE	1093	2514	1092	1379
Companilactobacillus paralimentarius	bacteria	FALSE	FALSE	2210	1809	1093	427
Psychrobacter sp. P11G5	bacteria	TRUE	TRUE	3679	3979	1094	5377
Streptococcus chenjunshii	bacteria	FALSE	FALSE	2285.5	625	1095	269
Methanolobus zinderi	archaea	FALSE	FALSE	4921	4796	1096.5	5377
Methanobacterium paludis	archaea	FALSE	FALSE	4476.5	5435	1096.5	5377
Lactobacillus terrae	bacteria	TRUE	FALSE	2478	1966	1098	327
Yersinia enterocolitica	bacteria	FALSE	FALSE	876	1017	1099	1698
Cyclobacterium marinum	bacteria	TRUE	FALSE	866	913	1100	1493
Olleya sp. Bg11-27	bacteria	TRUE	FALSE	1050	1203	1101	1159.5
Mycoplasma maculosum	bacteria	FALSE	FALSE	2031.5	3540.5	1102	1079
Leuconostoc gelidum	bacteria	TRUE	FALSE	1887	2090	1103	608
Methanosarcina lacustris	archaea	TRUE	FALSE	3907.5	4908	1104	5377
Entomoplasma melaleucae	bacteria	FALSE	FALSE	2447	3860	1105	925
Companilactobacillus heilongjiangensis	bacteria	FALSE	FALSE	2525.5	2327	1106	717.5
Nostoc edaphicum	bacteria	FALSE	TRUE	420	1422	1107	1605
Bacillus wiedmannii	bacteria	TRUE	FALSE	1071	2032	1108	1638
Nostoc flagelliforme	bacteria	FALSE	TRUE	947	1699	1109	2129.5
Mycoplasma sp. 1654_15	bacteria	FALSE	FALSE	1593	2990	1110	1007
Anoxybacillus caldiproteolyticus	bacteria	TRUE	FALSE	700	825.5	1111.5	753
Moumouvirus	virus_DNAother	FALSE	FALSE	4759.5	7207	1111.5	2177.5
Pradoshia sp. D12	bacteria	TRUE	FALSE	1148	1330	1113	594
Borreliella burgdorferi	bacteria	FALSE	FALSE	239	614	1114	1309
Mycoplasma sp. Phocoena C-264-GEN	bacteria	FALSE	FALSE	2961	3282	1115	564
Calothrix sp. NIES-2100	bacteria	FALSE	TRUE	432	958	1116.5	1633.5
Chryseobacterium sp. StRB126	bacteria	FALSE	FALSE	810	1125	1116.5	1781
Halobacteriovorax sp. BALOs_7	bacteria	FALSE	FALSE	967	1736	1118	1764
Acholeplasma axanthum	bacteria	FALSE	FALSE	1163	1328	1119.5	1067
Candidatus Gullanella endobia	bacteria	FALSE	FALSE	1152	2177	1119.5	1537
Parachlamydia acanthamoebae	bacteria	TRUE	FALSE	1831	2899.5	1121	2023
Treponema pedis	bacteria	TRUE	FALSE	856	323	1122	454
Marivirga tractuosa	bacteria	TRUE	FALSE	908	957	1123	1119
Lactobacillus murinus	bacteria	TRUE	FALSE	2480	1583	1124	369
Candidatus Carsonella ruddii	bacteria	FALSE	FALSE	178	559	1125	1735
Caulobacter sp. FWC26	bacteria	TRUE	FALSE	2289	3313	1126	5377
Jeotgalibaca dankookensis	bacteria	TRUE	FALSE	1952	1852	1127	244
Spiroplasma floricola	bacteria	FALSE	FALSE	1145	2468	1128	1305
Capnocytophaga endodontalis	bacteria	TRUE	FALSE	1644	344	1129	655
Porphyromonas asaccharolytica	bacteria	TRUE	FALSE	4803	296	1130.5	699
Sphingobacterium sp. DR205	bacteria	TRUE	FALSE	1500	1097.5	1130.5	1665.5
Sneathia amnii	bacteria	FALSE	FALSE	1399	986	1133.5	751
Solibacillus sp. R5-41	bacteria	TRUE	FALSE	1426	1611.5	1133.5	376
Chryseobacterium sp. G0186	bacteria	TRUE	FALSE	1164	1441	1133.5	1978.5
Lactobacillus hordei	bacteria	TRUE	FALSE	864	812	1133.5	259
Burkholderia glumae	bacteria	TRUE	FALSE	3164	3442	1136	5377
Caulobacter sp. K31	bacteria	TRUE	FALSE	1486	2330	1137	2374
Fictibacillus phosphorivorans	bacteria	TRUE	FALSE	1453	1399	1138	506
Polaribacter sp. MED152	bacteria	TRUE	FALSE	1005	1264	1139.5	1020
Sanguibacter sp. HDW7	bacteria	TRUE	FALSE	3306.5	2354.5	1139.5	5377
Bacillus vietnamensis	bacteria	TRUE	FALSE	289	646	1141	785
Acetohalobium arabaticum	bacteria	TRUE	FALSE	1346	1444	1142	1200
Pseudoalteromonas piscicida	bacteria	TRUE	TRUE	2294	2912.5	1143	2341.5
Lactobacillus backii	bacteria	TRUE	FALSE	2639	1152	1144	203
Liquorilactobacillus nagelii	bacteria	TRUE	FALSE	2699	1440	1145	295
Luteitalea pratensis	bacteria	TRUE	FALSE	2697	2557	1146	5377
Bradyrhizobium sp. CCBAU 53421	bacteria	TRUE	TRUE	1326.5	1626	1147	5377
Campylobacter lanienae	bacteria	TRUE	FALSE	2274	2642	1148	1755
Niabella soli	bacteria	TRUE	TRUE	2225	1863	1149	1577
Pelosinus fermentans	bacteria	TRUE	FALSE	1075	1028	1150	646
Phocaeicola salanitronis	bacteria	FALSE	FALSE	744	168	1151.5	442
Companilactobacillus zhachilii	bacteria	FALSE	FALSE	678	1092	1151.5	367
Corynebacterium diphtheriae	bacteria	TRUE	FALSE	2087	124	1153	217
Massilia putida	bacteria	TRUE	TRUE	3049	3152	1154	5377
Streptomyces sp. So13.3	bacteria	TRUE	TRUE	1181	1504	1155.5	2396.5
Aeromonas salmonicida	bacteria	TRUE	FALSE	1738.5	1891	1155.5	2129.5
Gloeothece verrucosa	bacteria	FALSE	FALSE	991	1717	1157	1131
Bacteroides ovatus	bacteria	FALSE	FALSE	654	314	1158	934
Pragia fontium	bacteria	TRUE	FALSE	2100	2446.5	1159	1916
Pseudoalteromonas ulvae	bacteria	TRUE	FALSE	3139.5	3090	1160	1028
Methylobacterium aquaticum	bacteria	TRUE	TRUE	1866	2949	1161	5377
Corynebacterium resistens	bacteria	TRUE	FALSE	3243.5	224	1162	482
Colwellia psychrerythraea	bacteria	TRUE	FALSE	900	1076	1163	768
Companilactobacillus crustorum	bacteria	FALSE	FALSE	1602	1489	1164.5	332
Leptotrichia sp. oral taxon 847	bacteria	FALSE	FALSE	1498	1587	1164.5	1150.5
Tateyamaria omphalii	bacteria	TRUE	FALSE	4518	5021.5	1166.5	5377
Methanosarcina horonobensis	archaea	FALSE	FALSE	748	2373	1166.5	2425.5
Enterobacter bugandensis	bacteria	TRUE	FALSE	6929.5	4755	1168	5377
Borreliella afzelii	bacteria	FALSE	FALSE	1768	3695.5	1169	1491
Frankia alni	bacteria	TRUE	FALSE	860	1445	1170	5377
Parageobacillus genomosp. 1	bacteria	TRUE	FALSE	2273	1277	1171.5	1724
Flavobacterium haoranii	bacteria	TRUE	FALSE	1340	1229	1171.5	1172
Alkaliphilus metalliredigens	bacteria	FALSE	FALSE	805	875	1173	782
Leptotrichia shahii	bacteria	FALSE	FALSE	1104	1436	1174	1102
Ligilactobacillus ruminis	bacteria	TRUE	FALSE	3804.5	1642	1175	486
Borrelia coriaceae	bacteria	FALSE	FALSE	618	1401	1176	1981.5
Virgibacillus sp. 6R	bacteria	TRUE	FALSE	1276	1920	1177	559
Candidatus Atelocyanobacterium thalassa	bacteria	FALSE	FALSE	1324.5	2823	1178	1756
Oscillatoria nigro-viridis	bacteria	TRUE	FALSE	1957	2354.5	1179	1609
Spiroplasma sp. BIUS-1	bacteria	FALSE	TRUE	2014	3520	1180	1277
Apibacter sp. B2966	bacteria	FALSE	FALSE	968	1405	1181	1809.5
Ignavibacterium album	bacteria	TRUE	FALSE	889	1765	1182	1454
Arcticibacterium luteifluviistationis	bacteria	TRUE	FALSE	1272	1158	1184	984
Lactobacillus hilgardii	bacteria	TRUE	FALSE	2039	1457.5	1184	334
Winogradskyella helgolandensis	bacteria	TRUE	TRUE	1454	1715	1184	1459
Candidatus Pelagibacter sp. HIMB1321	bacteria	FALSE	FALSE	1858	3049	1186	1906.5
Tamlana carrageenivorans	bacteria	TRUE	FALSE	1046	1226	1187	1478.5
Methanobrevibacter smithii	archaea	FALSE	FALSE	3431	4044	1188	1559
Borrelia hermsii	bacteria	FALSE	FALSE	702	1281	1189	1879.5
Peptoniphilus ivorii	bacteria	TRUE	FALSE	6929.5	948	1190	432
Sphingobacterium daejeonense	bacteria	TRUE	FALSE	1535	1454	1191	1330
Erythrobacter neustonensis	bacteria	TRUE	TRUE	838	1552	1192	5377
Pedobacter cryoconitis	bacteria	TRUE	FALSE	901	710	1193	1112
Actinomadura sp. NAK00032	bacteria	TRUE	FALSE	1063	1718	1194	5377
Photorhabdus thracensis	bacteria	TRUE	FALSE	1809.5	2333	1195.5	1439
Candidatus Nucleicultrix amoebiphila	bacteria	FALSE	FALSE	3056	3836	1195.5	2425.5
Mucilaginibacter paludis	bacteria	TRUE	FALSE	1350	1493	1197	1444
Elizabethkingia miricola	bacteria	FALSE	FALSE	613	1183	1198	1677
Neisseria meningitidis	bacteria	TRUE	TRUE	3157	633	1199	2053
Oceanihabitans sp. IOP_32	bacteria	FALSE	FALSE	1588	1418	1200	1534
Actinosynnema pretiosum	bacteria	TRUE	FALSE	699	1176	1201	5377
Planktothrix agardhii	bacteria	TRUE	FALSE	2597	2605	1202	1437
Caulobacter segnis	bacteria	TRUE	TRUE	4328	4354	1203	5377
Sulfurihydrogenibium azorense	bacteria	TRUE	FALSE	1514	2088	1204	1710
Acinetobacter shaoyimingii	bacteria	TRUE	TRUE	1799	2578	1205	1845
Mycoplasma iowae	bacteria	FALSE	FALSE	1174	2348	1206	932
Pedobacter sp. KBS0701	bacteria	TRUE	FALSE	1383	1469.5	1207	1432.5
Blautia argi	bacteria	FALSE	FALSE	937	494	1208	755
Nonlabens dokdonensis	bacteria	TRUE	FALSE	1242	1435	1209	1204
Colwellia sp. 20A7	bacteria	FALSE	FALSE	609	1438	1210	1422
Mycoplasma yeatsii	bacteria	FALSE	FALSE	1683.5	3079	1211	1282
Pediococcus claussenii	bacteria	FALSE	FALSE	1320	888	1212	296
Variovorax sp. RA8	bacteria	TRUE	TRUE	2846.5	2405	1213	5377
Salmonella bongori	bacteria	FALSE	TRUE	737	942	1214	1968
Defluviitoga tunisiensis	bacteria	FALSE	FALSE	892	1769	1215	1396
Candidatus Fukatsuia symbiotica	bacteria	FALSE	FALSE	3294	4092	1216	2303.5
Maribacter sp. HTCC2170	bacteria	TRUE	FALSE	1274	1359	1217	1848.5
Spiroplasma cantharicola	bacteria	FALSE	TRUE	1041	2472	1218	1665.5
Chryseobacterium aureum	bacteria	TRUE	FALSE	1187	2211	1219	2017
Panacibacter ginsenosidivorans	bacteria	TRUE	FALSE	875	940	1220	1616
Fischerella sp. NIES-3754	bacteria	TRUE	TRUE	1886	2233	1221	1597
Lysobacter enzymogenes	bacteria	TRUE	TRUE	671	843	1222	5377
Mycoplasma agalactiae	bacteria	FALSE	FALSE	1913.5	2706	1223	978.5
Acinetobacter sp. TTH0-4	bacteria	TRUE	TRUE	1521	2115	1225	1991
Acinetobacter wuhouensis	bacteria	TRUE	TRUE	716	1025	1225	1951.5
Chryseobacterium sp. 7-3A	bacteria	TRUE	FALSE	1520	1515	1225	1671
Streptomyces cadmiisoli	bacteria	TRUE	FALSE	1716	2777.5	1227	5377
Leptospira biflexa	bacteria	TRUE	FALSE	2208	2534	1228	1819
Izhakiella sp. KSNA2	bacteria	TRUE	TRUE	4601	4022	1229	2382.5
Muricauda ruestringensis	bacteria	TRUE	TRUE	2306	1836	1230	2091
Capnocytophaga cynodegmi	bacteria	FALSE	FALSE	2049	1701	1231	1424
Acinetobacter sp. TGL-Y2	bacteria	TRUE	TRUE	2240	2703	1232	2048
Arachidicoccus ginsenosidivorans	bacteria	FALSE	FALSE	230	378	1233.5	1430
Chryseobacterium antarcticum	bacteria	TRUE	FALSE	2605.5	1934	1233.5	1777
Mycoplasma penetrans	bacteria	FALSE	FALSE	1762	2293	1235	1148
Lactobacillus sp. NFFJ11	bacteria	FALSE	FALSE	2153.5	1361	1236	396
Bacteroides heparinolyticus	bacteria	FALSE	FALSE	1746	70	1237	330
Acetobacterium woodii	bacteria	TRUE	FALSE	936	947	1238.5	829
Methanobrevibacter sp. AbM4	archaea	FALSE	FALSE	4257.5	5157.5	1238.5	1937
Haemophilus haemolyticus	bacteria	TRUE	TRUE	1264	1009	1240	874
Lactobacillus mali	bacteria	FALSE	FALSE	1784	1556	1241	284
Muriicola sp. MMS17-SY002	bacteria	TRUE	FALSE	3242	2496	1242	1825
Candidatus Sulfurimonas marisnigri	bacteria	FALSE	FALSE	1299	2679	1243	1763
Desulfosporosinus acidiphilus	bacteria	FALSE	FALSE	1049	1471	1244	832
Campylobacter blaseri	bacteria	TRUE	FALSE	1058	1849	1245	1474
Bacillus miscanthi	bacteria	TRUE	FALSE	1879	2007	1246	804
Mycoplasma synoviae	bacteria	FALSE	FALSE	2385	2453.5	1247	683
Streptomyces chartreusis	bacteria	TRUE	FALSE	885	1266	1248	5377
Turicibacter sanguinis	bacteria	FALSE	FALSE	1982.5	2568	1249	1001
Sulfurimonas gotlandica	bacteria	FALSE	FALSE	813	1675	1250	1645.5
Mycoplasma hyopneumoniae	bacteria	FALSE	FALSE	2326	3414.5	1251	1538.5
Tenacibaculum sp. DSM 106434	bacteria	TRUE	FALSE	845	899	1252	1441
Pedobacter sp. eg	bacteria	TRUE	FALSE	1296	1216	1253	1383
Herbaspirillum seropedicae	bacteria	TRUE	TRUE	645	1358	1254	2030
Methanobrevibacter sp. YE315	archaea	FALSE	FALSE	4807.5	5006	1255	2300
Pandoraea pnomenusa	bacteria	TRUE	FALSE	353	890	1256	5377
Bacillus sp. PAMC26568	bacteria	TRUE	TRUE	1182	823	1257	713
Arcobacter trophiarum	bacteria	FALSE	FALSE	1214	2034	1258.5	1720
Virgibacillus necropolis	bacteria	TRUE	FALSE	348	651	1258.5	660
Formosa sp. Hel1_33_131	bacteria	TRUE	FALSE	1423	1615	1260	1795
Capnocytophaga sp. FDAARGOS_737	bacteria	FALSE	FALSE	2295.5	482	1261	990
Microbacterium sp. No. 7	bacteria	TRUE	TRUE	2120	2726	1262	5377
Corynebacterium glucuronolyticum	bacteria	TRUE	TRUE	3969	420	1263	529
Streptococcus troglodytae	bacteria	FALSE	FALSE	2958	811	1264	251
Mycoplasma bovis	bacteria	FALSE	FALSE	1945	2601.5	1265	1224
Methanococcus aeolicus	archaea	FALSE	FALSE	198	650	1266.5	2091
Paenibacillus baekrokdamisoli	bacteria	TRUE	FALSE	1642.5	1781	1266.5	822
Winogradskyella sp. PC-19	bacteria	TRUE	FALSE	1825	1827	1268	1286
Candidatus Izimaplasma sp. HR1	bacteria	FALSE	FALSE	2325	1497	1269	353
Alteromonas macleodii	bacteria	TRUE	FALSE	961	1028	1270	868
Thermosipho africanus	bacteria	FALSE	FALSE	1698	1846	1271	1302
Mesoplasma lactucae	bacteria	FALSE	FALSE	3842	4447	1272	1069
Anabaenopsis circularis	bacteria	FALSE	FALSE	2660	3726.5	1273.5	1613
Alkalihalobacillus clausii	bacteria	TRUE	FALSE	944	1294	1273.5	459
Chryseobacterium taihuense	bacteria	TRUE	FALSE	828	1464	1275	1307
Labrys sp. KNU-23	bacteria	FALSE	FALSE	157	348	1276	5377
Candidatus Hamiltonella defensa	bacteria	TRUE	TRUE	1379	1868	1277.5	2065.5
Microbacterium oleivorans	bacteria	TRUE	TRUE	3574.5	2305	1277.5	2165.5
Sphingobium yanoikuyae	bacteria	TRUE	TRUE	942	700	1279	2248.5
Anoxybacillus flavithermus	bacteria	TRUE	FALSE	1308	512	1280	245
Paraphotobacterium marinum	bacteria	FALSE	FALSE	1008	1260	1281	1443
Candidatus Nitrosocosmicus oleophilus	archaea	FALSE	FALSE	1968	3764.5	1282.5	2186.5
Listeria grayi	bacteria	TRUE	FALSE	2342.5	2174	1282.5	436
Dietzia lutea	bacteria	TRUE	TRUE	1959	2165	1284	1574
Acidovorax carolinensis	bacteria	TRUE	TRUE	1704	2044.5	1285	2317
Bartonella vinsonii	bacteria	TRUE	FALSE	2379	2318	1286	1875
Flavobacterium sp. P2-65	bacteria	TRUE	FALSE	1765	1524	1287	943
Butyrivibrio hungatei	bacteria	FALSE	FALSE	1570	851	1288	530
Pseudomonas koreensis	bacteria	TRUE	TRUE	2415	3573	1289	5377
Rufibacter sp. DG15C	bacteria	TRUE	FALSE	3586.5	1062	1290	5377
Pedobacter ginsengisoli	bacteria	TRUE	FALSE	1278.5	817	1291	1114
Paracoccus sp. Arc7-R13	bacteria	TRUE	TRUE	3197	3615	1292	5377
Bacillus sp. M4U3P1	bacteria	TRUE	FALSE	2518.5	2117	1293	242
Parabacteroides distasonis	bacteria	FALSE	FALSE	506	98	1294	252
Mycoplasma edwardii	bacteria	TRUE	FALSE	2034	2258	1295.5	1035.5
Chryseobacterium nakagawai	bacteria	TRUE	FALSE	1117	1395	1295.5	1693.5
Sulfurimonas sp. GYSZ_1	bacteria	FALSE	FALSE	1228	2274.5	1297	1864
Cyclobacterium amurskyense	bacteria	TRUE	FALSE	1574	1430	1298.5	1467.5
Francisella persica	bacteria	FALSE	FALSE	2107	2639	1298.5	1905
Vibrio alginolyticus	bacteria	FALSE	FALSE	777	1429	1300	2411
Campylobacter hominis	bacteria	FALSE	FALSE	2316	2113	1301.5	1243.5
Lacrimispora saccharolytica	bacteria	FALSE	FALSE	1450.5	750	1301.5	1326
Pseudomonas mendocina	bacteria	TRUE	TRUE	1019	1648	1303	2010.5
Francisella philomiragia	bacteria	FALSE	FALSE	687	1133	1304	1179
Gramella forsetii	bacteria	TRUE	FALSE	880	917	1305	1587
Methylobacterium durans	bacteria	TRUE	TRUE	3051	4362	1306	5377
Mycolicibacillus koreensis	bacteria	TRUE	FALSE	791	1321	1307	5377
Nostoc sp. PCC 7107	bacteria	FALSE	TRUE	887	1844	1308	2091
Mageeibacillus indolicus	bacteria	FALSE	FALSE	2730	337	1309	798
Pedobacter suwonensis	bacteria	TRUE	TRUE	850	1558	1310	2276
Tolypothrix sp. PCC 7910	bacteria	FALSE	TRUE	1162	2486	1311	1865
Lactobacillus sanfranciscensis	bacteria	FALSE	FALSE	669	995	1312	585
Flavobacterium arcticum	bacteria	TRUE	FALSE	1123	1209	1313	1675
Acinetobacter bereziniae	bacteria	TRUE	TRUE	1890	2683	1315	2177.5
Leptotrichia sp. oral taxon 498	bacteria	FALSE	TRUE	1457.5	1724	1315	1236
Sulfurimonas autotrophica	bacteria	FALSE	FALSE	2195	3030	1315	1867
Photobacterium profundum	bacteria	FALSE	FALSE	1571	2286	1318	1711
Vibrio taketomensis	bacteria	FALSE	FALSE	2749.5	3091	1318	2339
Campylobacter iguaniorum	bacteria	FALSE	FALSE	1503	2384	1318	1234.5
Providencia sneebia	bacteria	FALSE	FALSE	1385	2335	1320	2283
Elizabethkingia sp. JS20170427COW	bacteria	TRUE	FALSE	2001	2009	1321	1092
Paraprevotella xylaniphila	bacteria	FALSE	FALSE	2008	149	1322	281
Chryseobacterium sp. NEB161	bacteria	TRUE	FALSE	1080	1005	1323.5	1667
Flavobacterium sediminis	bacteria	TRUE	FALSE	1577	976	1323.5	962
Halobacillus litoralis	bacteria	TRUE	FALSE	1160	1655	1325	544
Candidatus Pelagibacter ubique	bacteria	TRUE	FALSE	1461	2917	1326.5	1794
Leptospira santarosai	bacteria	FALSE	TRUE	72	205	1326.5	5377
Methanosphaera stadtmanae	archaea	TRUE	FALSE	3562	4216.5	1328	2049
Algibacter sp. L3A6	bacteria	TRUE	FALSE	686	1020	1329	1463.5
Candidatus Pelagibacter giovannonii	bacteria	FALSE	FALSE	2084	3898	1330	1981.5
Enterobacteriaceae endosymbiont of Macroplea mutica	bacteria	FALSE	FALSE	1991	3381	1332.5	5377
Alkalitalea saponilacus	bacteria	TRUE	FALSE	1223	595	1332.5	847
Lactobacillus acidipiscis	bacteria	TRUE	FALSE	2919	1875	1332.5	292
Rufibacter tibetensis	bacteria	TRUE	FALSE	1795	1391	1332.5	2287
Providencia vermicola	bacteria	TRUE	FALSE	3007	2345.5	1335	1707
Corynebacterium flavescens	bacteria	TRUE	FALSE	4109	374	1336	503
Natranaerobius thermophilus	bacteria	TRUE	FALSE	800	1187	1337	1269
Neisseria sicca	bacteria	TRUE	FALSE	4522	1560	1338	1399
Campylobacter corcagiensis	bacteria	FALSE	FALSE	2531.5	2861.5	1340.5	1155
Borrelia turcica	bacteria	FALSE	FALSE	996	2724	1340.5	2173
Aeromonas hydrophila	bacteria	FALSE	FALSE	11	15	1340.5	1211
Formosa sp. Hel1_31_208	bacteria	FALSE	TRUE	594	1191	1340.5	1350
Francisella uliginis	bacteria	FALSE	FALSE	1235	2511	1343.5	1423
Campylobacter geochelonis	bacteria	FALSE	FALSE	1070	1451	1343.5	1688
Microbacterium foliorum	bacteria	TRUE	TRUE	2132	1472	1345	1998
Virgibacillus sp. Bac330	bacteria	TRUE	FALSE	1457.5	1661	1346	916
Neobacillus mesonae	bacteria	TRUE	FALSE	1600	1460	1347.5	754
Paraglaciecola psychrophila	bacteria	TRUE	FALSE	652	1101	1347.5	1906.5
Spiroplasma citri	bacteria	FALSE	FALSE	1143	2669	1349	1697
Enterococcus lactis	bacteria	FALSE	FALSE	6929.5	7207	1350	1911
Methylobacterium currus	bacteria	TRUE	TRUE	830	1519	1351	5377
Pseudomonas psychrophila	bacteria	TRUE	TRUE	4143.5	4174	1352	5377
Bradyrhizobium sp. ORS 278	bacteria	TRUE	FALSE	460	1211	1353	5377
Proteus sp. ZN5	bacteria	FALSE	FALSE	3198	4643.5	1354	1897
Campylobacter showae	bacteria	TRUE	FALSE	1930	355	1356	1054
Methanobrevibacter olleyae	archaea	FALSE	FALSE	3487	3611	1356	1965.5
Legionella fallonii	bacteria	FALSE	FALSE	1431.5	3212	1356	2031
Odoribacter splanchnicus	bacteria	FALSE	FALSE	1771	166	1358	848
Helicobacter bilis	bacteria	FALSE	FALSE	640	1409	1359	1792.5
Virgibacillus sp. SK37	bacteria	TRUE	TRUE	1140	1580	1360.5	631
Corynebacterium imitans	bacteria	TRUE	FALSE	4182	366	1360.5	788
Streptomyces alboflavus	bacteria	TRUE	FALSE	504	1070.5	1362	5377
Bacillus sp. V3	bacteria	TRUE	FALSE	1700	1620	1363	561
Candidatus Pelagibacter sp. RS40	bacteria	FALSE	FALSE	1047	2712	1364	1683
Aequorivita sublithincola	bacteria	TRUE	FALSE	1661	1066	1366	971
Sphingomonas alpina	bacteria	TRUE	TRUE	4762.5	4293	1366	5377
Mycoplasma glycophilum	bacteria	FALSE	FALSE	2440	3776	1366	1782
Bdellovibrio exovorus	bacteria	TRUE	FALSE	2796	3724	1368	1715.5
Myroides odoratus	bacteria	TRUE	FALSE	1107	1247	1370	1360
Nostoc sp. 'Peltigera membranacea cyanobiont' N6	bacteria	FALSE	TRUE	508	1383	1370	1800
Scytonema sp. NIES-4073	bacteria	FALSE	FALSE	614	1061	1370	2234
Bacteroides sp. HF-5287	bacteria	FALSE	FALSE	2000	126	1372	257
Staphylococcus virus Sextaec	virus_DNAbacteria	FALSE	FALSE	6929.5	7207	1373	5377
Nostoc sp. CENA543	bacteria	FALSE	TRUE	222	729	1374.5	1833
Siansivirga zeaxanthinifaciens	bacteria	TRUE	FALSE	1313	1628	1374.5	1727
Lactobacillus hokkaidonensis	bacteria	FALSE	FALSE	2416	1446	1376	260
Ralstonia mannitolilytica	bacteria	TRUE	TRUE	1606	2671	1377	5377
Blautia producta	bacteria	FALSE	FALSE	234	289	1378	502
Spiroplasma sp. TIUS-1	bacteria	FALSE	FALSE	2199	2827	1379.5	1314
Paenibacillus sp. IHBB 10380	bacteria	TRUE	FALSE	1693	2611	1379.5	881
Pseudoclostridium thermosuccinogenes	bacteria	TRUE	FALSE	953	804	1381.5	1248
Ottowia oryzae	bacteria	TRUE	TRUE	2327	3910.5	1381.5	5377
Pseudomonas psychrotolerans	bacteria	TRUE	FALSE	1573	2325.5	1383.5	2119.5
Bradyrhizobium guangzhouense	bacteria	TRUE	FALSE	2082.5	2606	1383.5	5377
Zymomonas mobilis	bacteria	FALSE	FALSE	35	58	1386.5	1345
Flagellimonas maritima	bacteria	TRUE	FALSE	1836	1567	1386.5	1361
Lactobacillus sp. BHWM-4	bacteria	FALSE	FALSE	2775	1962.5	1386.5	308
Glaesserella parasuis	bacteria	FALSE	FALSE	977	1284	1386.5	1390
Burkholderia cepacia	bacteria	TRUE	FALSE	1241	1578	1393.5	5377
Mucilaginibacter ginsenosidivorax	bacteria	FALSE	FALSE	1501	852	1393.5	968
Spiroplasma diminutum	bacteria	FALSE	FALSE	1772	2442	1393.5	1341
Pseudomonas cedrina	bacteria	TRUE	FALSE	4452	5152	1393.5	5377
Microcystis aeruginosa	bacteria	FALSE	TRUE	428	972	1393.5	2297
Kluyvera intermedia	bacteria	FALSE	TRUE	1671	1929	1393.5	2326
Rippkaea orientalis	bacteria	TRUE	FALSE	2206.5	2566	1393.5	1626
Megasphaera stantonii	bacteria	TRUE	FALSE	1725	424	1393.5	1178
Xenorhabdus hominickii	bacteria	FALSE	TRUE	2384	2881	1393.5	2110.5
Francisella halioticida	bacteria	FALSE	FALSE	1685	3034.5	1393.5	1648
Radiobacillus deserti	bacteria	TRUE	FALSE	1233	1518	1404.5	650
Psychromonas sp. CNPT3	bacteria	FALSE	TRUE	2002.5	3002	1404.5	1955
Actinomyces sp. zg-332	bacteria	TRUE	FALSE	1900	1585	1404.5	1070
Aerococcus sanguinicola	bacteria	TRUE	FALSE	2805	1550	1404.5	402
Campylobacter sp. RM16192	bacteria	FALSE	FALSE	2182	2072	1404.5	1463.5
Pontibacillus sp. HMF3514	bacteria	TRUE	FALSE	2189	2040	1404.5	553
Pseudanabaena sp. ABRG5-3	bacteria	FALSE	FALSE	1973	2613	1404.5	2121.5
Lactiplantibacillus pentosus	bacteria	TRUE	FALSE	1910.5	1072	1404.5	371
Spiroplasma poulsonii	bacteria	FALSE	FALSE	1939	2952	1404.5	1215
Oenococcus oeni	bacteria	FALSE	FALSE	1668	1380	1404.5	555
Candidatus Phytoplasma ziziphi	bacteria	FALSE	FALSE	2234	4246	1404.5	2220.5
Listeria seeligeri	bacteria	TRUE	FALSE	1179	1189	1404.5	479
Entomoplasma freundtii	bacteria	TRUE	FALSE	4795	5292	4865	2140.5
Vibrio owensii	bacteria	FALSE	FALSE	1303.5	1575	4865	2105
Halothece sp. PCC 7418	bacteria	TRUE	FALSE	2918	3956	4865	2341.5
Thermosulfuriphilus ammonigenes	bacteria	TRUE	FALSE	3844	4815	4865	5377
Candidatus Pseudomonas adelgestsugas	bacteria	FALSE	FALSE	3251	4230	4865	2350.5
Actinoplanes missouriensis	bacteria	TRUE	TRUE	1627	2184.5	4865	5377
Acinetobacter sp. WCHAc010052	bacteria	TRUE	TRUE	3506	4666.5	4865	5377
Acinetobacter sp. WCHA55	bacteria	TRUE	TRUE	3381	3944	4865	5377
Mycobacterium sp. MS1601	bacteria	TRUE	TRUE	3303.5	2877	4865	2310
Coprothermobacter proteolyticus	bacteria	TRUE	TRUE	6929.5	5354	4865	5377
Arcanobacterium phocae	bacteria	TRUE	FALSE	6929.5	2321	4865	1094
Sinorhizobium sp. CCBAU 05631	bacteria	FALSE	FALSE	1892	3526	4865	5377
endosymbiont of Euscepes postfasciatus	bacteria	FALSE	FALSE	6929.5	5560	4865	5377
Rickettsia africae	bacteria	FALSE	FALSE	4402	5508	4865	5377
Rickettsia helvetica	bacteria	FALSE	FALSE	4762.5	5544	4865	5377
Actinomadura sp. WMMB 499	bacteria	TRUE	TRUE	1267	1546	4865	5377
Chitinibacter fontanus	bacteria	TRUE	TRUE	1619	3402	4865	5377
Candidatus Methylopumilus universalis	bacteria	TRUE	FALSE	2070	2245.5	4865	1801
Candidatus Kinetoplastibacterium sorsogonicusi	bacteria	FALSE	FALSE	1389	2815	4865	1580.5
Xanthomonas citri	bacteria	FALSE	TRUE	5	8	4865	5377
Xanthomonas oryzae	bacteria	TRUE	TRUE	788	1613	4865	5377
Xanthomonas translucens	bacteria	TRUE	TRUE	1891	3569	4865	5377
Arsenophonus endosymbiont of Aphis craccivora	bacteria	TRUE	TRUE	2566	3457.5	4865	2148
Maridesulfovibrio hydrothermalis	bacteria	TRUE	FALSE	3528.5	3767	4865	1031
Iodobacter sp. H11R3	bacteria	TRUE	FALSE	3383.5	3476	4865	1583.5
Pseudomonas sp. ACM7	bacteria	TRUE	FALSE	4301	5146.5	4865	5377
Monaibacterium sp. ALG8	bacteria	TRUE	TRUE	6929.5	4984	4865	5377
Microvirgula aerodenitrificans	bacteria	TRUE	FALSE	4714	3846	4865	5377
Pseudomonas asturiensis	bacteria	TRUE	TRUE	3394	3120	4865	5377
Streptomyces sp. M56	bacteria	TRUE	FALSE	4374	5311	4865	5377
Erythrobacter sp. HL-111	bacteria	TRUE	TRUE	2645.5	4579	4865	5377
Gordonia sp. KTR9	bacteria	TRUE	FALSE	2323	2291	4865	5377
Sulfitobacter pseudonitzschiae	bacteria	TRUE	TRUE	3879	2827	4865	5377
Paenibacillus sp. FSL P4-0081	bacteria	TRUE	FALSE	3108	3655	4865	5377
Dokdonia sp. MED134	bacteria	TRUE	FALSE	1793	1376	4865	5377
Basilea psittacipulmonis	bacteria	TRUE	FALSE	4196.5	3626	4865	2411
Streptomyces sp. CFMR 7	bacteria	FALSE	TRUE	2675.5	3722	4865	5377
Streptomyces sp. fd1-xmd	bacteria	TRUE	TRUE	1941	2017	4865	5377
Paenalcaligenes hominis	bacteria	TRUE	FALSE	4937	5029	4865	5377
Streptosporangium sp. 'caverna'	bacteria	TRUE	TRUE	542	1053	4865	5377
Pseudomonas palleroniana	bacteria	TRUE	TRUE	4981	5273	4865	5377
Planctomyces sp. SH-PL62	bacteria	TRUE	FALSE	2435	2850	4865	5377
Candidatus Planktophila versatilis	bacteria	TRUE	FALSE	6929.5	3485	4865	5377
Serratia plymuthica	bacteria	TRUE	FALSE	444	629	4865	1965.5
Wenzhouxiangella sp. AB-CW3	bacteria	TRUE	FALSE	698	1463	4865	5377
Nocardioides daphniae	bacteria	TRUE	TRUE	3033	3466	4865	5377
Gynuella sunshinyii	bacteria	TRUE	FALSE	3312	3436	4865	5377
Actinomyces sp. oral taxon 897	bacteria	TRUE	FALSE	1796.5	284	4865	1019
Pelagibaca abyssi	bacteria	TRUE	TRUE	3802	4018	4865	5377
Ktedonosporobacter rubrisoli	bacteria	TRUE	FALSE	1710	2459	4865	5377
Pseudomonas fragi	bacteria	TRUE	TRUE	3113	4212.5	4865	5377
Streptococcus sp. HSISS3	bacteria	FALSE	FALSE	4816	396	4865	167
Dehalobacter restrictus	bacteria	TRUE	FALSE	2483	3436	4865	5377
Campylobacter virus CP21	virus_DNAbacteria	FALSE	FALSE	6929.5	7207	4865	5377
Roseburia intestinalis	bacteria	FALSE	FALSE	934	704	4865	940
Hymenobacter sp. S2-20-2	bacteria	TRUE	TRUE	2993	2109	4865	5377
Mycolicibacterium sp. LJ126	bacteria	TRUE	TRUE	3905	3450	4865	5377
Intestinibaculum porci	bacteria	TRUE	FALSE	2513	1737	4865	722
Halomonas sp. GFAJ-1	bacteria	TRUE	FALSE	6929.5	4648	4865	5377
Runella sp. HYN0085	bacteria	TRUE	FALSE	1805	1638	4865	1821.5
Pontibacter actiniarum	bacteria	TRUE	FALSE	2452	1668.5	4865	2104
Thermus aquaticus	bacteria	TRUE	TRUE	2471	2904	4865	5377
Neisseria brasiliensis	bacteria	TRUE	TRUE	6929.5	4507	4865	5377
Corynebacterium epidermidicanis	bacteria	TRUE	FALSE	4656.5	643	4865	703
Bacterioplanes sanyensis	bacteria	TRUE	TRUE	4168.5	4686.5	4865	5377
Bacillus sp. N1-1	bacteria	TRUE	FALSE	1801	2285	4865	694
Bartonella apis	bacteria	TRUE	FALSE	2875.5	1830	4865	1376.5
Aminipila sp. JN-18	bacteria	FALSE	FALSE	2043	1541.5	4865	1183
Caproiciproducens sp. NJN-50	bacteria	TRUE	FALSE	3681	2324	4865	5377
Rubrobacter indicoceani	bacteria	TRUE	TRUE	3601.5	3910.5	4865	5377
Microbacterium sp. L-031	bacteria	TRUE	TRUE	2303.5	2396	4865	5377
Microbacterium sp. ST-M6	bacteria	TRUE	TRUE	1550	1970	4865	5377
Rhodanobacter denitrificans	bacteria	TRUE	FALSE	1530	3188	4865	5377
Serinicoccus profundi	bacteria	TRUE	TRUE	4013	2881	4865	5377
Caulobacter rhizosphaerae	bacteria	TRUE	FALSE	3510	4454.5	4865	5377
Streptomyces sp. S4.7	bacteria	TRUE	TRUE	1610	2139	4865	5377
Marinomonas mediterranea	bacteria	TRUE	FALSE	3016	3455	4865	5377
Gudongella oleilytica	bacteria	FALSE	TRUE	4238.5	2721	4865	1128
Oxynema sp. AP17	bacteria	TRUE	FALSE	1368	1913	4865	5377
Elizabethkingia ursingii	bacteria	TRUE	FALSE	1688	2071	4865	2086.5
Acinetobacter venetianus	bacteria	TRUE	TRUE	1371	2266.5	4865	1727
Campylobacter sp. RM6914	bacteria	FALSE	FALSE	1960	1343	4865	1603
Sphingomonas lacunae	bacteria	TRUE	TRUE	6929.5	5358.5	4865	5377
Algoriphagus sp. Y33	bacteria	TRUE	FALSE	1591	1254	4865	1746
Desulfatibacillum aliphaticivorans	bacteria	TRUE	FALSE	626	1495	4865	2374
Lentibacillus amyloliquefaciens	bacteria	TRUE	FALSE	1910.5	1824.5	4865	989
Frondihabitans sp. PAMC 28766	bacteria	TRUE	TRUE	3419	3563	4865	5377
Leucobacter denitrificans	bacteria	TRUE	FALSE	6929.5	3905	4865	2118
Pseudoalteromonas translucida	bacteria	TRUE	FALSE	3885	3951	4865	2175
Pseudoalteromonas paragorgicola	bacteria	FALSE	FALSE	1311	2290	4865	5377
Parageobacillus toebii	bacteria	TRUE	FALSE	3191	2172	4865	5377
Pimelobacter simplex	bacteria	TRUE	TRUE	3780	3403.5	4865	5377
Psychrobacter sp. DAB_AL43B	bacteria	TRUE	TRUE	1808	3033	4865	1976
Desulfosporosinus youngiae	bacteria	TRUE	FALSE	2776	2336	4865	1324.5
Novosphingobium sp. ABRDHK2	bacteria	TRUE	TRUE	3966	5497	4865	5377
Acetobacter ascendens	bacteria	TRUE	FALSE	3782.5	4535	4865	5377
Halomonas sp. MCCC 1A13316	bacteria	TRUE	FALSE	4721	3888	4865	5377
Paracoccus kondratievae	bacteria	FALSE	FALSE	336	1054	4865	5377
Bacillus sp. NSP9.1	bacteria	TRUE	FALSE	2328	1834.5	4865	1034
Shinella sp. HZN7	bacteria	TRUE	TRUE	1631	2041	4865	5377
Columbid alphaherpesvirus 1	virus_DNAvertebrates	FALSE	FALSE	6929.5	7207	4865	5377
Paenibacillus sp. JZ16	bacteria	TRUE	FALSE	3082.5	2917	4865	1851
Pelagerythrobacter marensis	bacteria	TRUE	FALSE	3774.5	4763	4865	5377
Mycolicibacterium tokaiense	bacteria	TRUE	FALSE	2583.5	2136.5	4865	5377
Bacteriovorax stolpii	bacteria	TRUE	FALSE	2163	2249	4865	1678
Mycolicibacterium moriokaense	bacteria	TRUE	TRUE	4303.5	3747	4865	5377
Mycolicibacterium parafortuitum	bacteria	TRUE	TRUE	3329	3347	4865	5377
Paenibacillus mucilaginosus	bacteria	TRUE	FALSE	492	603	4865	1610
Microbacterium sp. Se63.02b	bacteria	FALSE	TRUE	564	792	4865	5377
Thermodesulfobium acidiphilum	bacteria	TRUE	FALSE	1885	2033	4865	1705.5
Intrasporangium calvum	bacteria	TRUE	TRUE	4251.5	2987	4865	5377
Micromonospora sp. B006	bacteria	TRUE	TRUE	2408	3143	4865	5377
Olsenella timonensis	bacteria	TRUE	FALSE	4486	504	4865	949
Ammonifex degensii	bacteria	TRUE	FALSE	2753	3042	4865	2255
Rickettsiales endosymbiont of Stachyamoeba lipophora	bacteria	FALSE	FALSE	1877.5	2894	4865	1294
Melaminivora sp. SC2-9	bacteria	TRUE	TRUE	3201	4381	4865	5377
Thalassolituus oleivorans	bacteria	TRUE	FALSE	4315.5	3506	4865	2271.5
Sphingobium sp. KCTC 72723	bacteria	TRUE	TRUE	6929.5	4918	4865	5377
Murdochiella vaginalis	bacteria	TRUE	FALSE	4745	537	4865	837
Synechococcus lividus	bacteria	TRUE	FALSE	6929.5	5432	4865	5377
Bacillus sp. KH172YL63	bacteria	TRUE	FALSE	1222	1257	4865	1187
Anaeromyxobacter sp. Fw109-5	bacteria	TRUE	TRUE	2631.5	2888	4865	5377
Ensifer sojae	bacteria	TRUE	FALSE	4450	4353	4865	5377
Kitasatospora albolonga	bacteria	TRUE	FALSE	1775	3304	4865	5377
Paludibaculum fermentans	bacteria	TRUE	FALSE	3708.5	3108	4865	1295
Curvibacter sp. AEP1-3	bacteria	TRUE	FALSE	2948.5	3232.5	4865	5377
Mesorhizobium huakuii	bacteria	TRUE	FALSE	786	2282	4865	5377
Streptomyces antimycoticus	bacteria	TRUE	FALSE	2044	2831	4865	5377
Akkermansia glycaniphila	bacteria	TRUE	FALSE	4594	2917	4865	5377
Planococcus maritimus	bacteria	TRUE	FALSE	4257.5	4834	4865	2177.5
Novosphingobium sp. P6W	bacteria	TRUE	TRUE	4974	4546	4865	5377
Campylobacter subantarcticus	bacteria	TRUE	FALSE	1824	3242	4865	5377
Dietzia psychralcaliphila	bacteria	TRUE	FALSE	2576.5	2478	4865	5377
Desulfotomaculum reducens	bacteria	TRUE	FALSE	2166	2087	4865	1600.5
Rubrobacter sp. SCSIO 52909	bacteria	TRUE	TRUE	2793	3417	4865	5377
Choristoneura murinana nucleopolyhedrovirus	virus_DNAother	FALSE	FALSE	3872	5353	4865	5377
Listeria sp. PSOL-1	bacteria	TRUE	FALSE	2235	2156	4865	492
Sinorhizobium medicae	bacteria	TRUE	FALSE	6929.5	3705	4865	5377
Brevundimonas naejangsanensis	bacteria	TRUE	TRUE	2788	3142	4865	5377
Cellulosilyticum lentocellum	bacteria	FALSE	FALSE	870	1172	4865	602
Pseudomonas sp. HLS-6	bacteria	TRUE	TRUE	4677	4636	4865	5377
Geobacter sp. M18	bacteria	TRUE	FALSE	4128.5	3207	4865	5377
Amycolatopsis japonica	bacteria	TRUE	TRUE	3503	4146.5	4865	5377
Sphingomonas sp. NBWT7	bacteria	TRUE	TRUE	3589.5	4485	4865	5377
Gallibacterium anatis	bacteria	TRUE	TRUE	1260.5	2202	4865	2374
Rhizobium jaguaris	bacteria	TRUE	TRUE	3942	3988.5	4865	5377
Stella humosa	bacteria	TRUE	TRUE	729	1666.5	4865	5377
Thermosipho sp. 1070	bacteria	FALSE	FALSE	6929.5	7207	4865	5377
Arthrobacter sp. FB24	bacteria	TRUE	TRUE	3747	2695	4865	5377
Chelativorans sp. BNC1	bacteria	TRUE	FALSE	4754.5	3095	4865	5377
Desulfovibrio alaskensis	bacteria	TRUE	TRUE	4364	2970	4865	5377
Weissella viridescens	bacteria	TRUE	FALSE	2571	3274	4865	792
Stygiolobus azoricus	archaea	FALSE	FALSE	4456	5297.5	4865	5377
Pantoea sp. CCBC3-3-1	bacteria	FALSE	TRUE	2818	3591	4865	5377
Stappia indica	bacteria	TRUE	TRUE	566	1565	4865	5377
Vibrio cyclitrophicus	bacteria	FALSE	TRUE	2777	4374.5	4865	5377
Pseudoxanthomonas suwonensis	bacteria	TRUE	TRUE	2308	2528	4865	5377
Streptomyces sp. CCM_MD2014	bacteria	TRUE	FALSE	2071	4431.5	4865	5377
Curtobacterium sp. MR_MD2014	bacteria	TRUE	FALSE	2075.5	2896	4865	5377
Burkholderia sp. Bp7605	bacteria	TRUE	FALSE	3410	4632	4865	5377
Rhodovulum sp. P5	bacteria	TRUE	FALSE	6929.5	4890	4865	5377
Pseudomonas sp. S35	bacteria	TRUE	TRUE	3800	4683.5	4865	5377
Streptomyces viridosporus	bacteria	TRUE	FALSE	1755	2901	4865	5377
Pectobacterium carotovorum	bacteria	TRUE	TRUE	974	996	4865	1216
Nakamurella panacisegetis	bacteria	TRUE	TRUE	3063.5	2932	4865	5377
Sphingomonas rhizophila	bacteria	TRUE	TRUE	4165	4427.5	4865	5377
Erwinia amylovora	bacteria	TRUE	FALSE	4536.5	4411.5	4865	5377
Gemmatimonas phototrophica	bacteria	TRUE	FALSE	3531	3546.5	4865	5377
Sulfurimonas paralvinellae	bacteria	FALSE	FALSE	1760.5	2465	4865	2154
Borreliella valaisiana	bacteria	FALSE	FALSE	2717	4277	4865	5377
Frankia inefficax	bacteria	TRUE	FALSE	621	871	4865	2230
Blattabacterium sp. (Cryptocercus kyebangensis)	bacteria	FALSE	FALSE	2938	4589	4865	5377
Pseudoalteromonas spongiae	bacteria	TRUE	FALSE	2444	3013.5	4865	1733.5
Sediminicola sp. YIK13	bacteria	TRUE	FALSE	1874	1476	4865	1797
Frankia sp. EAN1pec	bacteria	TRUE	TRUE	1127	1630.5	4865	5377
Thioclava nitratireducens	bacteria	TRUE	TRUE	6929.5	5415	4865	5377
Pseudomonas sp. TUM18999	bacteria	TRUE	TRUE	4360.5	4686.5	4865	5377
Bordetella bronchiseptica	bacteria	TRUE	TRUE	1532	1473	4865	5377
Candidatus Planktophila limnetica	bacteria	TRUE	FALSE	4896.5	5364	4865	5377
Yersinia ruckeri	bacteria	TRUE	TRUE	2141	2889	4865	5377
Mycoplasma ovipneumoniae	bacteria	FALSE	FALSE	3291	4391	4865	1245
Oenococcus kitaharae	bacteria	FALSE	FALSE	3132	3005	4865	921
Burkholderia sp. KK1	bacteria	TRUE	TRUE	4554	4868	4865	5377
Pseudomonas sp. R76	bacteria	TRUE	TRUE	6929.5	7207	4865	5377
Thermodesulfatator indicus	bacteria	TRUE	TRUE	2569	3433	4865	5377
Mucilaginibacter sp. 14171R-50	bacteria	TRUE	FALSE	2204.5	2127	4865	2291
Thermoanaerobacter ethanolicus	bacteria	TRUE	FALSE	6929.5	7207	4865	5377
Novosphingobium sp. Gsoil 351	bacteria	TRUE	TRUE	4535	4780	4865	5377
Psychrobacter arcticus	bacteria	TRUE	TRUE	3549	4841	4865	5377
Streptomyces sp. Z423-1	bacteria	TRUE	FALSE	881	2105	4865	5377
Paenibacillus xylanilyticus	bacteria	TRUE	FALSE	2605.5	2654	4865	1557
Pseudopropionibacterium propionicum	bacteria	TRUE	FALSE	3032	138	4865	735.5
Streptococcus phage SM1	virus_DNAbacteria	FALSE	FALSE	6929.5	7207	4865	5377
Citrobacter freundii complex sp. CFNIH9	bacteria	FALSE	TRUE	6929.5	7207	4865	5377
Janthinobacterium lividum	bacteria	TRUE	TRUE	4282	4104	4865	5377
Bradyrhizobium sp. WSM471	bacteria	TRUE	TRUE	6929.5	5222	4865	5377
Saprospira grandis	bacteria	TRUE	FALSE	4401	2206	4865	2248.5
Mycobacterium sp. PYR15	bacteria	TRUE	FALSE	4289.5	4128	4865	5377
Enterobacteriaceae endosymbiont of Macroplea appendiculata	bacteria	FALSE	FALSE	3416.5	4184.5	4865	2425.5
Enterobacteriaceae endosymbiont of Plateumaris sericea	bacteria	FALSE	TRUE	3712.5	4932.5	4865	5377
Enterobacteriaceae endosymbiont of Plateumaris rustica	bacteria	FALSE	TRUE	2709	4357	4865	5377
Bacillus sp. FJAT-42376	bacteria	TRUE	FALSE	1572	1499.5	4865	622
Paenibacillus sp. JNUCC-31	bacteria	FALSE	FALSE	136	318	4865	1570.5
Microlunatus sp. KUDC0627	bacteria	TRUE	FALSE	579	1129	4865	5377
Pandoraea oxalativorans	bacteria	TRUE	FALSE	3285	3621.5	4865	5377
Mesobacillus jeotgali	bacteria	TRUE	FALSE	2297	1903	4865	514
Cetia pacifica	bacteria	FALSE	FALSE	2024	3209	4865	2050
Desulfovibrio gigas	bacteria	TRUE	TRUE	2982	3128.5	4865	5377
Sphingomonas sp. HDW15C	bacteria	TRUE	TRUE	6929.5	5464	4865	5377
Mycolicibacterium phocaicum	bacteria	TRUE	TRUE	3184.5	1228	4865	5377
Dyella thiooxydans	bacteria	TRUE	TRUE	4420	4601	4865	5377
Halobacillus halophilus	bacteria	TRUE	FALSE	1455.5	1508	4865	601
Phreatobacter sp. NMCR1094	bacteria	TRUE	TRUE	3266	3478	4865	5377
Leifsonia xyli	bacteria	TRUE	TRUE	1112	1033.5	4865	5377
Mycobacterium sp. JS623	bacteria	TRUE	FALSE	3121	3232.5	4865	5377
Mycoplasma ovis	bacteria	FALSE	FALSE	2911	3875	4865	5377
Geobacter metallireducens	bacteria	TRUE	FALSE	3377.5	3269	4865	5377
Solitalea canadensis	bacteria	TRUE	FALSE	1614	1128	4865	1127
Micromonospora sp. WMMC415	bacteria	TRUE	FALSE	2148	1731	4865	5377
Chromobacterium vaccinii	bacteria	TRUE	FALSE	3370	2456	4865	5377
Desulfuromonas soudanensis	bacteria	FALSE	FALSE	423	944	4865	5377
Paracoccus sanguinis	bacteria	TRUE	TRUE	4116.5	4343	4865	5377
Diaphorobacter aerolatus	bacteria	TRUE	TRUE	4236	4180.5	4865	5377
Nitrosospira lacus	bacteria	TRUE	TRUE	2889	3786	4865	5377
Marmoricola scoriae	bacteria	TRUE	TRUE	3957	3230	4865	5377
Leeuwenhoekiella sp. ZYFB001	bacteria	TRUE	FALSE	1128.5	1099	4865	1689
Pseudomonas savastanoi	bacteria	TRUE	FALSE	6929.5	7207	4865	5377
Sphingomonas sp. HDW15A	bacteria	TRUE	TRUE	4982.5	4802	4865	5377
Arthrobacter sp. YC-RL1	bacteria	TRUE	FALSE	3098	1762.5	4865	2368
Nakamurella sp. PAMC28650	bacteria	TRUE	TRUE	3782.5	3113.5	4865	5377
Hyphomicrobium denitrificans	bacteria	TRUE	TRUE	2011.5	1921	4865	5377
[Pseudomonas] mesoacidophila	bacteria	TRUE	FALSE	2260	3782.5	4865	5377
Paenibacillus sp. PAMC21692	bacteria	TRUE	FALSE	3344	2991	4865	1985
Variovorax sp. PAMC28562	bacteria	TRUE	TRUE	4031	4081	4865	2425.5
Halomonas venusta	bacteria	TRUE	FALSE	4715	5178	4865	5377
Bosea sp. Tri-49	bacteria	TRUE	TRUE	2633	3629	4865	5377
Methylacidiphilum kamchatkense	bacteria	FALSE	FALSE	295	782	4865	5377
Leptospira weilii	bacteria	TRUE	FALSE	2783	4457	4865	5377
Altererythrobacter atlanticus	bacteria	TRUE	FALSE	5038.5	5475.5	4865	5377
Microbacterium endophyticum	bacteria	FALSE	FALSE	4529	3265	4865	5377
Mesoplasma entomophilum	bacteria	FALSE	FALSE	2417	3913	4865	5377
Actinomyces sp. oral taxon 414	bacteria	TRUE	FALSE	1193	133	4865	1201
Legionella longbeachae	bacteria	TRUE	FALSE	1598	2765	4865	1773
Streptomyces sp. CB00271	bacteria	FALSE	FALSE	3170	3231	4865	5377
Olivibacter sp. LS-1	bacteria	FALSE	FALSE	2309	2089	4865	5377
Legionella spiritensis	bacteria	TRUE	TRUE	2615.5	3885	4865	5377
Candidatus Frankia datiscae	bacteria	TRUE	TRUE	3340	3371	4865	5377
Salinimonas sp. KX18D6	bacteria	TRUE	FALSE	6929.5	2928	4865	1453
Paenibacillus guangzhouensis	bacteria	TRUE	FALSE	3397	2436	4865	1146
Treponema sp. RCC2812	bacteria	FALSE	FALSE	493	766	4865	1220
Pseudomonas granadensis	bacteria	TRUE	TRUE	6929.5	7207	4865	5377
Acinetobacter chinensis	bacteria	TRUE	TRUE	3958	4052	4865	5377
Haemophilus pittmaniae	bacteria	TRUE	FALSE	4706	4760.5	4865	5377
Candidatus Protochlamydia naegleriophila	bacteria	FALSE	FALSE	2907	3838	4865	629
Borrelia duttonii	bacteria	FALSE	FALSE	1807	3664.5	4865	5377
Methanoregula formicica	archaea	TRUE	FALSE	6929.5	7207	4865	5377
Adlercreutzia equolifaciens	bacteria	TRUE	FALSE	6929.5	1323	4865	5377
Halanaeroarchaeum sulfurireducens	archaea	FALSE	FALSE	4665	5276.5	4865	5377
Nitrosococcus oceani	bacteria	TRUE	FALSE	4930	5548	4865	5377
Hydrogenophaga sp. PBL-H3	bacteria	TRUE	TRUE	4336	4142	4865	5377
Pseudomonas alcaligenes	bacteria	TRUE	TRUE	4593	4924.5	4865	5377
Azotobacter salinestris	bacteria	TRUE	TRUE	3792	3893	4865	5377
Alteromonas naphthalenivorans	bacteria	TRUE	TRUE	3734	5000	4865	5377
Capnocytophaga ochracea	bacteria	FALSE	FALSE	1694	800	4865	1002
Entomoplasma luminosum	bacteria	FALSE	FALSE	1975	2616	4865	1663
Pseudomonas salegens	bacteria	FALSE	TRUE	806	1482	4865	5377
Bradyrhizobium sp. ORS 285	bacteria	TRUE	TRUE	4208.5	3990	4865	5377
Martelella endophytica	bacteria	TRUE	TRUE	3797	3944	4865	5377
Methylophilus sp. TWE2	bacteria	TRUE	TRUE	6929.5	4779	4865	5377
Rhizobium sp. 007	bacteria	TRUE	TRUE	6929.5	5562	4865	5377
Pelistega sp. NLN63	bacteria	FALSE	FALSE	929	1602	4865	1969
Limnoglobus roseus	bacteria	FALSE	TRUE	225	618	4865	5377
Baekduia soli	bacteria	TRUE	TRUE	2123	2424	4865	5377
Brachybacterium sp. P6-10-X1	bacteria	TRUE	TRUE	1757	1943.5	4865	2063
Tropheryma whipplei	bacteria	FALSE	FALSE	4677	4583	4865	5377
Vibrio sp. EJY3	bacteria	FALSE	TRUE	4754.5	7207	4865	5377
Herbaspirillum frisingense	bacteria	TRUE	TRUE	3544	3965	4865	5377
Lacimicrobium alkaliphilum	bacteria	TRUE	TRUE	4139.5	3425	4865	5377
Bradyrhizobium japonicum	bacteria	TRUE	TRUE	2505.5	2013	4865	5377
Paenibacillus ihbetae	bacteria	TRUE	FALSE	2121	1678	4865	1296
Paenibacillus lutimineralis	bacteria	TRUE	FALSE	1969	1806.5	4865	850
Tatumella sp. TA1	bacteria	TRUE	TRUE	4198.5	4718	4865	2155
Mycobacterium sp. DL90	bacteria	TRUE	TRUE	4514	3323.5	4865	5377
Ruegeria sp. TM1040	bacteria	TRUE	TRUE	3490.5	3726.5	4865	5377
Actinoplanes sp. N902-109	bacteria	TRUE	TRUE	447	761	4865	5377
Sphingobacterium psychroaquaticum	bacteria	FALSE	FALSE	1609	1012	4865	1509
Pseudomonas sp. NS1(2017)	bacteria	TRUE	TRUE	6929.5	7207	4865	5377
Paenibacillus sp. FSL R7-0273	bacteria	TRUE	FALSE	2314	2020	4865	1743.5
Bartonella tribocorum	bacteria	FALSE	FALSE	2018	2770	4865	5377
Paenibacillus sp. FSL R5-0345	bacteria	TRUE	FALSE	2681	2235	4865	938
Lactococcus sp. KACC 19320	bacteria	FALSE	FALSE	3617.5	2866	4865	724
Lysinimonas sp. KACC 19322	bacteria	TRUE	TRUE	4483	4458	4865	5377
Acetobacter sp. KACC 21233	bacteria	TRUE	FALSE	4924.5	5362.5	4865	5377
Paenibacillus sp. FSL H7-0357	bacteria	TRUE	FALSE	2802	2133	4865	1521.5
Paenibacillus sp. FSL H7-0737	bacteria	TRUE	FALSE	1840	1993	4865	955
Colwellia sp. Arc7-D	bacteria	FALSE	FALSE	1665	2708	4865	1857
Obesumbacterium proteus	bacteria	TRUE	FALSE	3600	4765	4865	5377
Hymenobacter nivis	bacteria	TRUE	FALSE	2173	1639	4865	5377
Thermoplasma acidophilum	archaea	FALSE	FALSE	6929.5	7207	4865	5377
Pseudomonas sp. NP-1	bacteria	TRUE	TRUE	4522	5073	4865	5377
Deinococcus irradiatisoli	bacteria	TRUE	TRUE	4127	4534	4865	5377
Pseudobutyrivibrio xylanivorans	bacteria	FALSE	FALSE	2020	731	4865	762
Hymenobacter jejuensis	bacteria	TRUE	FALSE	3497.5	1702	4865	2168
Acidihalobacter ferrooxydans	bacteria	TRUE	TRUE	36	51	4865	5377
Aureimonas sp. LMG 31693	bacteria	TRUE	FALSE	4795	4275	4865	5377
Nautilia profundicola	bacteria	TRUE	FALSE	2339.5	3474	4865	1831
Francisella adeliensis	bacteria	FALSE	FALSE	3254	3782.5	4865	5377
Alicyclobacillus acidocaldarius	bacteria	TRUE	TRUE	3951	2736	4865	5377
Sulfurospirillum sp. SL2-1	bacteria	FALSE	FALSE	6929.5	7207	4865	5377
Hungatella hathewayi	bacteria	FALSE	FALSE	694	687	4865	1122
Lignipirellula cremea	bacteria	TRUE	FALSE	1455.5	2105	4865	5377
Rhizobium sp. IE4771	bacteria	TRUE	FALSE	6929.5	7207	4865	5377
Flintibacter sp. KGMB00164	bacteria	TRUE	TRUE	3934.5	1538	4865	2121.5
Citrobacter sp. FDAARGOS_156	bacteria	FALSE	TRUE	6929.5	7207	4865	5377
Cohnella abietis	bacteria	FALSE	FALSE	82	228	4865	1414
Thermococcus barophilus	archaea	FALSE	FALSE	4825	7207	4865	5377
Mycoplasma nasistruthionis	bacteria	FALSE	FALSE	2059	3908	4865	1486.5
Desulfovibrio fairfieldensis	bacteria	TRUE	FALSE	2883	2852	4865	5377
Shewanella sp. W3-18-1	bacteria	FALSE	FALSE	6929.5	7207	4865	5377
Roseimaritima ulvae	bacteria	FALSE	TRUE	350	806	4865	5377
Salmonella phage SW9	virus_DNAbacteria	FALSE	FALSE	134	73	4865	5377
Mariniblastus fucicola	bacteria	TRUE	FALSE	4234	4203	4865	5377
Conchiformibius steedae	bacteria	TRUE	FALSE	6929.5	5235.5	4865	5377
Arenimonas daejeonensis	bacteria	TRUE	TRUE	3382	4209.5	4865	5377
Fervidobacterium pennivorans	bacteria	FALSE	FALSE	1626	2086	4865	1635
Echinicola strongylocentroti	bacteria	TRUE	FALSE	2555	1728	4865	2223
Prosthecochloris sp. CIB 2401	bacteria	TRUE	FALSE	4324	4188.5	4865	5377
Altererythrobacter ishigakiensis	bacteria	TRUE	TRUE	6929.5	5228	4865	5377
Dickeya solani	bacteria	TRUE	FALSE	4898	5109	4865	5377
Rothia nasimurium	bacteria	TRUE	TRUE	3358.5	661	4865	1547
Sulfurospirillum sp. UCH001	bacteria	TRUE	FALSE	2771	3519	4865	1455
Pseudomonas sp. ATCC 43928	bacteria	TRUE	FALSE	6929.5	7207	4865	5377
Petrotoga mobilis	bacteria	FALSE	FALSE	1752	2807	4865	1933.5
Brevibacillus agri	bacteria	TRUE	FALSE	3744	2245.5	4865	542
Paenibacillus odorifer	bacteria	TRUE	FALSE	1285	1496	4865	1143
Cellulosimicrobium sp. BI34T	bacteria	TRUE	FALSE	3286	2682	4865	5377
Candidatus Blochmannia pennsylvanicus	bacteria	FALSE	TRUE	3547	4654	4865	5377
Sphingorhabdus sp. JK6	bacteria	TRUE	TRUE	2678	3952	4865	5377
Streptomyces fagopyri	bacteria	TRUE	FALSE	2133	2430.5	4865	5377
Acidihalobacter aeolianus	bacteria	TRUE	TRUE	4574	4171	4865	5377
Hydrocarboniclastica marina	bacteria	TRUE	TRUE	6929.5	4827	4865	5377
Pseudomonas sp. MPC6	bacteria	TRUE	TRUE	4438	5268	4865	5377
Alistipes megaguti	bacteria	TRUE	FALSE	2543.5	581	4865	975
Eubacterium maltosivorans	bacteria	FALSE	FALSE	1353	2083	4865	2186.5
Lysobacter lycopersici	bacteria	TRUE	TRUE	6929.5	5392	4865	5377
Chryseolinea soli	bacteria	TRUE	FALSE	1778	1594	4865	5377
Pseudomonas vancouverensis	bacteria	TRUE	TRUE	1696	4112	4865	5377
Candidatus Hodgkinia cicadicola	bacteria	FALSE	FALSE	1563	2840	4865	1615
Leptospira borgpetersenii	bacteria	FALSE	FALSE	665	1768	4865	2203
Ehrlichia sp. HF	bacteria	FALSE	FALSE	1758	3773	4865	5377
Leptolyngbya sp. BL0902	bacteria	TRUE	TRUE	3918.5	3780	4865	5377
Thermococcus sp. SY113	archaea	FALSE	FALSE	4951.5	5525	4865	5377
Gordonia terrae	bacteria	TRUE	TRUE	2537	1774	4865	5377
Gordonia bronchialis	bacteria	TRUE	TRUE	3424	3059	4865	5377
Caulobacter sp. Ji-3-8	bacteria	TRUE	TRUE	3634	3755	4865	5377
Neisseria weaveri	bacteria	TRUE	TRUE	3897.5	3764.5	4865	2242
Synechococcus phage S-CAM8	virus_DNAbacteria	FALSE	FALSE	3363	5121	4865	5377
Eggerthella lenta	bacteria	TRUE	FALSE	4889	774	4865	1946
Oscillatoria acuminata	bacteria	TRUE	TRUE	1625	1905	4865	1732
Slackia heliotrinireducens	bacteria	TRUE	FALSE	5031	634	4865	1037
Corynebacterium uterequi	bacteria	TRUE	FALSE	3938.5	764	4865	983
Chlamydia trachomatis	bacteria	FALSE	TRUE	3537.5	4782	4865	5377
Rhodospirillum centenum	bacteria	TRUE	TRUE	2434	3514	4865	5377
Bacillus sp. SYJ	bacteria	TRUE	FALSE	3639.5	4393	4865	5377
Rheinheimera sp. D18	bacteria	TRUE	FALSE	4643.5	4258	4865	5377
Aeromonas jandaei	bacteria	FALSE	FALSE	76	179	4865	5377
Sphingobium sp. RAC03	bacteria	TRUE	TRUE	6929.5	5162.5	4865	5377
Thermomonas carbonis	bacteria	TRUE	TRUE	6929.5	4988.5	4865	5377
Aeromicrobium sp. MF47	bacteria	TRUE	TRUE	3566	2782	4865	5377
Vibrio scophthalmi	bacteria	FALSE	FALSE	3357	2180	4865	1775.5
Vitreoscilla sp. C1	bacteria	TRUE	FALSE	2403	3345.5	4865	5377
Methylovirgula ligni	bacteria	TRUE	FALSE	6929.5	5208.5	4865	5377
Rubrobacter xylanophilus	bacteria	TRUE	FALSE	2651.5	2764	4865	5377
Pseudoalteromonas aliena	bacteria	FALSE	TRUE	1344	2608	4865	2199.5
Mumia sp. ZJ1417	bacteria	TRUE	TRUE	2129	2722	4865	5377
Blattabacterium sp. (Mastotermes darwiniensis)	bacteria	TRUE	TRUE	3262.5	4508.5	4865	5377
Serratia sp. LS-1	bacteria	TRUE	FALSE	6929.5	7207	4865	5377
Streptomyces sp. jing01	bacteria	TRUE	FALSE	3149.5	3390.5	4865	5377
Mycobacterium kubicae	bacteria	TRUE	TRUE	3346	3149	4865	5377
Pseudomonas alkylphenolica	bacteria	TRUE	TRUE	2058	3052	4865	5377
Candidatus Profftella armatura	bacteria	FALSE	FALSE	4413	5302.5	4865	1306
Sodalis praecaptivus	bacteria	TRUE	FALSE	3727	4304	4865	5377
Acinetobacter towneri	bacteria	TRUE	TRUE	692	1601	4865	2353
Acinetobacter baylyi	bacteria	FALSE	TRUE	1861	2775	4865	5377
Leclercia sp. 29361	bacteria	TRUE	TRUE	4886.5	5521	4865	5377
Mycobacterium mantenii	bacteria	FALSE	TRUE	115	363	4865	5377
Hydrogenovibrio crunogenus	bacteria	TRUE	FALSE	3047	2527	4865	2044
Nonlabens sediminis	bacteria	FALSE	FALSE	6929.5	3803.5	4865	5377
Filimonas lacunae	bacteria	TRUE	FALSE	1291	1119	4865	2075
Thermocrinis albus	bacteria	TRUE	FALSE	4413	5435	4865	5377
Candidatus Blochmannia chromaiodes	bacteria	FALSE	FALSE	2724.5	4146.5	4865	5377
Nocardioides sp. MC1495	bacteria	TRUE	TRUE	1471	1981	4865	5377
Corynebacterium endometrii	bacteria	TRUE	FALSE	3008	316	4865	379
Exiguobacterium antarcticum	bacteria	TRUE	FALSE	1636	2325.5	4865	931
Pantoea rwandensis	bacteria	TRUE	TRUE	4105	3789.5	4865	5377
Shewanella aestuarii	bacteria	TRUE	FALSE	3098	3830	4865	1981.5
Lactobacillus animalis	bacteria	TRUE	FALSE	2947	1796	4865	490
Exiguobacterium acetylicum	bacteria	TRUE	FALSE	2237	3763	4865	5377
Meiothermus ruber	bacteria	TRUE	FALSE	236	799	4865	5377
Streptomyces sp. NHF165	bacteria	TRUE	TRUE	1528	1573	4865	5377
Acinetobacter dispersus	bacteria	TRUE	TRUE	2176.5	4029	4865	2078
Bacillus sp. JS	bacteria	TRUE	FALSE	6929.5	7207	4865	5377
Lacrimispora sphenoides	bacteria	FALSE	FALSE	1702	905	4865	1428
Salinibacterium sp. ZJ450	bacteria	TRUE	TRUE	1943	2297	4865	2233
Pyrobaculum islandicum	archaea	FALSE	FALSE	5017	5566	4865	5377
Thalassobius gelatinovorus	bacteria	TRUE	TRUE	6929.5	5042	4865	5377
Faecalibaculum rodentium	bacteria	TRUE	FALSE	3536	2397	4865	5377
Paramecium bursaria Chlorella virus AR158	virus_DNAother	FALSE	FALSE	6929.5	7207	4865	5377
Mycobacteroides immunogenum	bacteria	TRUE	TRUE	2180.5	1802	4865	5377
Streptomyces kanamyceticus	bacteria	TRUE	FALSE	1444	2546.5	4865	5377
Streptomyces vinaceus	bacteria	TRUE	FALSE	1401	2409	4865	5377
Sphingobium sp. EP60837	bacteria	TRUE	TRUE	6929.5	5280	4865	5377
Paenibacillus durus	bacteria	TRUE	FALSE	1089	1173	4865	1506
Paenibacillus beijingensis	bacteria	TRUE	FALSE	2921.5	2691	4865	1409
Aeromonas sp. 1805	bacteria	FALSE	FALSE	2563	4540	4865	5377
Aeromonas sp. 2692-1	bacteria	TRUE	FALSE	6929.5	7207	4865	5377
Candidatus Phycorickettsia trachydisci	bacteria	TRUE	FALSE	2910	4017	4865	5377
Streptomyces nodosus	bacteria	TRUE	TRUE	1813	2495	4865	5377
Deinococcus geothermalis	bacteria	TRUE	TRUE	3810	3891	4865	5377
Methylomusa anaerophila	bacteria	TRUE	FALSE	1712	1946	4865	2231.5
Pseudomonas sp. R4-35-07	bacteria	TRUE	FALSE	6929.5	7207	4865	5377
Salinispora arenicola	bacteria	TRUE	TRUE	1912	2479	4865	5377
Salinispora tropica	bacteria	FALSE	TRUE	341	1023	4865	5377
Runella slithyformis	bacteria	TRUE	FALSE	2040	1755	4865	1669
Leadbetterella byssophila	bacteria	TRUE	FALSE	2986	1423	4865	1250
Pseudomonas sp. R5-89-07	bacteria	TRUE	TRUE	6929.5	7207	4865	5377
Sulfuritalea hydrogenivorans	bacteria	TRUE	TRUE	4541.5	4794.5	4865	5377
Komagataeibacter nataicola	bacteria	TRUE	FALSE	4577	5530	4865	5377
Pseudomonas veronii	bacteria	TRUE	TRUE	6929.5	5505.5	4865	5377
Methylobacterium sp. WL1	bacteria	TRUE	TRUE	773	2046	4865	5377
Deinococcus actinosclerus	bacteria	TRUE	TRUE	1934	2874	4865	5377
Halomonas meridiana	bacteria	TRUE	TRUE	2979	2720	4865	2368
Halomonas subglaciescola	bacteria	TRUE	TRUE	6929.5	5379	4865	5377
Chitinimonas arctica	bacteria	TRUE	TRUE	1751	2159	4865	5377
Glutamicibacter halophytocola	bacteria	TRUE	FALSE	4843	2579.5	4865	1768
Taylorella equigenitalis	bacteria	FALSE	FALSE	3322	3075	4865	817
Pseudobacter ginsenosidimutans	bacteria	TRUE	FALSE	2317	1716	4865	1449
Shewanella sediminis	bacteria	FALSE	FALSE	2348.5	3466	4865	2346
Streptomyces sp. TLI_053	bacteria	TRUE	FALSE	758	1603	4865	5377
Rickettsia rhipicephali	bacteria	FALSE	FALSE	2871.5	5176	4865	5377
Komagataeibacter europaeus	bacteria	TRUE	TRUE	6929.5	5503	4865	5377
Myxococcus stipitatus	bacteria	TRUE	TRUE	1640	1635	4865	5377
Gluconacetobacter diazotrophicus	bacteria	TRUE	TRUE	2588	3511	4865	5377
Jeongeupia sp. USM3	bacteria	TRUE	TRUE	4084	4403	4865	5377
Mycolicibacterium fortuitum	bacteria	TRUE	TRUE	2613	3138	4865	5377
Mycobacterium intracellulare	bacteria	FALSE	TRUE	48	105	4865	5377
Streptomyces sp. NEAU-sy36	bacteria	TRUE	FALSE	1482.5	2388	4865	5377
Cyanobium sp. NIES-981	bacteria	TRUE	FALSE	363	1258	4865	5377
Acetilactobacillus jinshanensis	bacteria	TRUE	FALSE	2625	2152	4865	813
Synechocystis sp. PCC 6714	bacteria	TRUE	TRUE	2832	4054	4865	5377
Tepidiforma bonchosmolovskayae	bacteria	TRUE	FALSE	3711	3810.5	4865	5377
Encephalitozoon romaleae	fungi	FALSE	FALSE	3895.5	5179	4865	5377
Rhizobium pseudoryzae	bacteria	TRUE	TRUE	3716	3335	4865	5377
Enterobacteriaceae endosymbiont of Donacia piscatrix	bacteria	FALSE	FALSE	4581	5394	4865	5377
Enterobacteriaceae endosymbiont of Donacia proxima	bacteria	FALSE	FALSE	3692	5096	4865	5377
Enterobacteriaceae endosymbiont of Donacia sparganii	bacteria	FALSE	FALSE	1239	2549	4865	5377
Enterobacteriaceae endosymbiont of Donacia thalassina	bacteria	FALSE	FALSE	3909	5240	4865	5377
Salinibacter ruber	bacteria	TRUE	FALSE	1488	1479	4865	2306
Bacillus sp. FJAT-45348	bacteria	TRUE	FALSE	1312	1595	4865	649
Vibrio natriegens	bacteria	FALSE	TRUE	2475	3273	4865	5377
Devosia sp. D6-9	bacteria	TRUE	FALSE	6929.5	4451	4865	5377
Pseudorhodobacter sp. S12M18	bacteria	TRUE	TRUE	4820.5	4775.5	4865	5377
Pithovirus sibericum	virus_DNAother	FALSE	FALSE	6929.5	7207	4865	5377
Gramella salexigens	bacteria	TRUE	FALSE	3788	2361	4865	1637
Citrobacter koseri	bacteria	FALSE	TRUE	245	516	4865	5377
Plantibacter sp. M259	bacteria	TRUE	TRUE	4445	4505	4865	5377
Sphingobium sp. YG1	bacteria	TRUE	FALSE	4838.5	3227	4865	5377
Dechloromonas aromatica	bacteria	TRUE	TRUE	4098	4480	4865	5377
Aeropyrum camini	archaea	FALSE	FALSE	6929.5	7207	4865	5377
Wenzhouxiangella marina	bacteria	TRUE	TRUE	4643.5	4606	4865	5377
Carboxydothermus hydrogenoformans	bacteria	TRUE	FALSE	976	1412	4865	2382.5
Micromonospora krabiensis	bacteria	TRUE	FALSE	381	809	4865	5377
Rodentibacter heylii	bacteria	FALSE	FALSE	1360	2025	4865	1521.5
Maribacter sp. 1_2014MBL_MicDiv	bacteria	FALSE	FALSE	2620.5	3021.5	4865	5377
Vibrio nigripulchritudo	bacteria	TRUE	FALSE	2203	2463	4865	5377
Selenomonas sp. oral taxon 136	bacteria	TRUE	FALSE	6929.5	517	4865	5377
Lymphocystis disease virus - isolate China	virus_DNAother	FALSE	FALSE	6929.5	7207	4865	5377
Antarcticibacterium sp. PAMC 28998	bacteria	FALSE	FALSE	121	253	4865	2047
Dictyoglomus thermophilum	bacteria	FALSE	FALSE	799	1820	4865	1570.5
Leifsonia sp. 21MFCrub1.1	bacteria	TRUE	FALSE	2818	1812	4865	5377
Aeromicrobium choanae	bacteria	TRUE	TRUE	6929.5	4100	4865	5377
Candidatus Liberibacter solanacearum	bacteria	FALSE	TRUE	2589.5	4007	4865	5377
Pandoraea thiooxydans	bacteria	TRUE	TRUE	3839	3217	4865	5377
Jiangella sp. DSM 45060	bacteria	TRUE	TRUE	2140	2150	4865	5377
Providencia alcalifaciens	bacteria	FALSE	FALSE	1244	2037	4865	1935
Erysipelothrix inopinata	bacteria	FALSE	FALSE	3218	1907	4865	913
Roseovarius indicus	bacteria	TRUE	FALSE	1391	1828	4865	5377
Streptomyces ferrugineus	bacteria	FALSE	FALSE	133	391	4865	5377
Brachybacterium saurashtrense	bacteria	TRUE	TRUE	1956	1535	4865	2396.5
Marivivens sp. JLT3646	bacteria	TRUE	FALSE	6929.5	5099	4865	5377
Syntrophus aciditrophicus	bacteria	TRUE	TRUE	3365.5	3323.5	4865	5377
Mycolicibacterium doricum	bacteria	TRUE	TRUE	3268.5	2515	4865	1624
Pantoea alhagi	bacteria	TRUE	TRUE	6929.5	5260	4865	5377
Proteus hauseri	bacteria	FALSE	FALSE	797	1824.5	4865	2207.5
Desulfobacula toluolica	bacteria	TRUE	FALSE	1679	2232	4865	5377
Bacteroides helcogenes	bacteria	FALSE	FALSE	1962	301	4865	610
Curtobacterium sp. csp3	bacteria	TRUE	TRUE	4538	5095	4865	5377
Lentzea guizhouensis	bacteria	TRUE	TRUE	1615	1726.5	4865	5377
Microbacterium protaetiae	bacteria	TRUE	TRUE	3056	1704	4865	5377
Xylanimonas allomyrinae	bacteria	TRUE	TRUE	2812	1885	4865	5377
Paenibacillus protaetiae	bacteria	TRUE	FALSE	4420	2766	4865	2116.5
Streptomyces sp. S1D4-11	bacteria	FALSE	FALSE	837	2019	4865	5377
Streptomyces sp. RPA4-5	bacteria	TRUE	TRUE	2216	3247	4865	5377
Streptomyces sp. RPA4-2	bacteria	TRUE	FALSE	2520	3441	4865	5377
Streptomyces sp. RLB1-33	bacteria	TRUE	TRUE	1597	2160	4865	5377
Deinococcus sp. D7000	bacteria	TRUE	FALSE	4445	4938	4865	5377
Pseudonocardia sp. HH130629-09	bacteria	TRUE	TRUE	3205	2554	4865	5377
Bordetella genomosp. 13	bacteria	TRUE	TRUE	3604.5	3746	4865	5377
Saliniradius amylolyticus	bacteria	TRUE	TRUE	6929.5	4520	4865	5377
Variovorax sp. PBS-H4	bacteria	TRUE	TRUE	2721.5	3749	4865	5377
Streptomyces koyangensis	bacteria	TRUE	FALSE	2711	3986.5	4865	5377
Brevibacterium aurantiacum	bacteria	TRUE	TRUE	3466	1038	4865	2368
Thermodesulfobacterium commune	bacteria	TRUE	TRUE	2656	3884	4865	2374
Arthrobacter alpinus	bacteria	TRUE	FALSE	2229	544	4865	732
Bacteroides sp. HF-5141	bacteria	FALSE	FALSE	1719	847	4865	1050
Acinetobacter sp. C16S1	bacteria	TRUE	TRUE	3002	3944	4865	2099
[Clostridium] hylemonae	bacteria	TRUE	FALSE	3045.5	1764	4865	1743.5
Actinobacillus indolicus	bacteria	FALSE	TRUE	3223	3533	4865	5377
Enterobacteriaceae endosymbiont of Donacia bicoloricornis	bacteria	FALSE	FALSE	2627	4790.5	4865	5377
Micavibrio aeruginosavorus	bacteria	TRUE	FALSE	4703.5	3796.5	4865	5377
Acinetobacter cumulans	bacteria	FALSE	TRUE	2539	3934.5	4865	2374
Marinobacter adhaerens	bacteria	FALSE	TRUE	1100	2524	4865	5377
Thermococcus pacificus	archaea	FALSE	TRUE	6929.5	7207	4865	5377
Ruthenibacterium lactatiformans	bacteria	TRUE	FALSE	4021	999	4865	5377
Cupriavidus necator	bacteria	TRUE	TRUE	756	1100	4865	2308
Liberibacter crescens	bacteria	FALSE	TRUE	2025	3464	4865	2303.5
Bradyrhizobium genosp. L	bacteria	TRUE	TRUE	2038	2284	4865	5377
Gruiform aveparvovirus 1	virus_DNAvertebrates	FALSE	TRUE	6929.5	7207	4865	5377
Paraoceanicella profunda	bacteria	TRUE	FALSE	1282	2168	4865	5377
Enterobacter sp. E76	bacteria	TRUE	TRUE	2550.5	3072	4865	5377
Brevundimonas sp. M20	bacteria	TRUE	TRUE	4211	4815	4865	5377
Sinorhizobium fredii	bacteria	TRUE	TRUE	622	511	4865	2125
Mesorhizobium loti	bacteria	TRUE	TRUE	738	970.5	4865	5377
Sinorhizobium meliloti	bacteria	TRUE	TRUE	2648	2395	4865	1483
Azoarcus sp. KH32C	bacteria	TRUE	TRUE	4313	4166	4865	5377
Streptomyces seoulensis	bacteria	FALSE	TRUE	106	299	4865	5377
Antarctobacter heliothermus	bacteria	TRUE	TRUE	4022	4067	4865	5377
Hymenobacter sedentarius	bacteria	TRUE	TRUE	3552	1824.5	4865	5377
Arthrobacter sp. AQ5-05	bacteria	FALSE	TRUE	6929.5	5555	4865	5377
Pandoraea sp. XY-2	bacteria	TRUE	TRUE	4382	4157	4865	5377
Bosea vaviloviae	bacteria	TRUE	TRUE	3344	3671	4865	5377
Olivibacter sp. SDN3	bacteria	TRUE	FALSE	1701	1475	4865	1194
Streptomyces nitrosporeus	bacteria	FALSE	TRUE	2259	2628	4865	5377
Phytobacter ursingii	bacteria	TRUE	TRUE	4293	3025	4865	2330
Dickeya fangzhongdai	bacteria	TRUE	FALSE	4163	4831	4865	5377
Pyrobaculum ferrireducens	archaea	FALSE	FALSE	2789	4674	4865	5377
Salicibibacter halophilus	bacteria	TRUE	FALSE	3322	3157	4865	1448
Xanthomonas vasicola	bacteria	TRUE	TRUE	6929.5	4977	4865	5377
Xanthomonas sacchari	bacteria	TRUE	TRUE	1595	2963	4865	5377
Xanthomonas hyacinthi	bacteria	TRUE	TRUE	4620	5395	4865	5377
Xanthomonas hortorum	bacteria	TRUE	TRUE	3493	3218	4865	5377
Janthinobacterium sp. HH102	bacteria	TRUE	FALSE	4027.5	4439	4865	5377
Synechococcus sp. Minos11	bacteria	TRUE	FALSE	4517	4184.5	4865	5377
Thermaerobacter marianensis	bacteria	TRUE	TRUE	2902	3066	4865	5377
Xanthomonas cassavae	bacteria	TRUE	TRUE	2979	4586	4865	5377
Xanthomonas cucurbitae	bacteria	TRUE	TRUE	4217	4371.5	4865	5377
Pseudomonas sp. CCOS 191	bacteria	TRUE	TRUE	6929.5	7207	4865	5377
Leifsonia shinshuensis	bacteria	TRUE	FALSE	3780	3915	4865	5377
Thioalkalivibrio nitratireducens	bacteria	TRUE	TRUE	1287.5	2690	4865	5377
Polystyrenella longa	bacteria	TRUE	FALSE	2605.5	2942	4865	5377
Fluviicola taffensis	bacteria	TRUE	FALSE	1881	1480	4865	1167
Acinetobacter sp. SWBY1	bacteria	TRUE	TRUE	3773	5113.5	4865	5377
Advenella mimigardefordensis	bacteria	TRUE	FALSE	4397.5	4626	4865	5377
Streptomyces autolyticus	bacteria	FALSE	FALSE	1641	2810	4865	5377
Pirellulimonas nuda	bacteria	TRUE	FALSE	2376	2288	4865	5377
Methanocaldococcus jannaschii	archaea	FALSE	FALSE	3728.5	4942	4865	2173
Sphingobacterium thalpophilum	bacteria	TRUE	TRUE	1846	1153	4865	1887
Candidatus Filomicrobium marinum	bacteria	TRUE	TRUE	6929.5	5129.5	4865	5377
Polynucleobacter sp. LimPoW16	bacteria	FALSE	FALSE	2338	3058	4865	5377
Mannheimia haemolytica	bacteria	FALSE	TRUE	1053	1474	4865	1923.5
Azoarcus sp. DN11	bacteria	TRUE	TRUE	2253	2140.5	4865	5377
Polynucleobacter wuianus	bacteria	FALSE	TRUE	4386	5053.5	4865	5377
Pseudomonas sp. IzPS32d	bacteria	TRUE	TRUE	6929.5	7207	4865	5377
Lactobacillus rossiae	bacteria	TRUE	FALSE	2048	1167	4865	248
Pseudonocardia dioxanivorans	bacteria	TRUE	FALSE	1380	2043	4865	5377
Lysobacter sp. HDW10	bacteria	TRUE	TRUE	6929.5	5444.5	4865	5377
Thermomonas brevis	bacteria	TRUE	TRUE	1667	3103	4865	5377
Acinetobacter wanghuae	bacteria	TRUE	TRUE	1578	2688	4865	5377
Nocardioides sp. dk884	bacteria	TRUE	TRUE	3699	3608	4865	5377
Hafnia paralvei	bacteria	FALSE	FALSE	2803.5	2777.5	4865	5377
Campylobacter helveticus	bacteria	FALSE	FALSE	1713	2182	4865	5377
Nocardioides sp. ZJ1313	bacteria	TRUE	FALSE	3256	2965.5	4865	5377
Spirosoma sp. CJU-R4	bacteria	TRUE	FALSE	1263	1212	4865	5377
Duganella sp. GN2-R2	bacteria	TRUE	TRUE	2608	3348	4865	5377
Duganella sp. AF9R3	bacteria	TRUE	TRUE	3184.5	3959	4865	5377
Mucilaginibacter sp. F39-2	bacteria	TRUE	TRUE	2738	1864	4865	1582
Cohnella sp. MFER-1	bacteria	TRUE	FALSE	2562	2052	4865	1300
Microbulbifer sp. SH-1	bacteria	TRUE	TRUE	4369	4188.5	4865	5377
[truncated: 7,589 more rows]

## Sheet: Supp Table 5 Cox
Supplementary Table 5: Cox proportional hazards modeling analysis for Survival
Metatranscriptome
Kingdom	Lineage	Probable Contaminant	mean Relative Abundance	coef	HR	CI	pval	adj.pval
bacteria	Lacticaseibacillus rhamnosus	FALSE	0.00261	0.259	1.295	1.07-1.57	0.00836418	0.516204
virus_RNAvertebrates	Severe acute respiratory syndrome-related coronavirus	FALSE	0.0488	0.29	1.336	1.07-1.67	0.0115329	0.0230657
bacteria	Staphylococcus haemolyticus	FALSE	0.0101	0.242	1.274	1.04-1.56	0.0196604	0.516204
fungi	Candida orthopsilosis	FALSE	0.00316	0.235	1.264	1.02-1.56	0.0297759	0.208431
bacteria	Thermotoga maritima	TRUE	0.00102	-1.224	0.294	0.09-0.97	0.043968	0.516204
bacteria	Corynebacterium simulans	FALSE	0.000633	-5.609	0.004	0-1.25	0.0595773	0.516204
bacteria	Xanthomonas euvesicatoria	TRUE	0.000781	-0.924	0.397	0.15-1.05	0.0619001	0.516204
bacteria	Anaerococcus prevotii	FALSE	0.000617	0.254	1.29	0.98-1.69	0.0658236	0.516204
bacteria	Lactobacillus gasseri	FALSE	0.00403	-2.671	0.069	0-1.19	0.0658916	0.516204
bacteria	Achromobacter xylosoxidans	TRUE	0.00423	-1.528	0.217	0.04-1.16	0.0746513	0.516204
Metagenome
Kingdom	Lineage	Probable Contaminant	Mean Relative Abundance	coef	HR	CI	pval	adj.pval
bacteria	Staphylococcus epidermidis	FALSE	0.00732	0.283	1.328	1.06-1.66	0.012756	0.267998
bacteria	Mycoplasma salivarium	FALSE	0.000609	0.348	1.416	1.07-1.87	0.0137435	0.267998
bacteria	Parvimonas micra	FALSE	0.000841	0.257	1.293	1.04-1.61	0.0235618	0.285104
bacteria	Limosilactobacillus fermentum	FALSE	0.000652	-0.651	0.522	0.29-0.94	0.0292415	0.285104
bacteria	Escherichia coli	FALSE	0.00575	0.184	1.202	0.99-1.46	0.0654713	0.510676
bacteria	Streptomyces sp. ICC4	FALSE	0.00372	0.177	1.193	0.98-1.46	0.0857221	0.557193
bacteria	Pseudoalteromonas sp. Scap06	FALSE	0.0177	-0.295	0.745	0.52-1.07	0.109134	0.608033
bacteria	Aeromonas hydrophila	FALSE	0.00576	-0.223	0.8	0.56-1.14	0.219818	0.821521
bacteria	Serratia sp. 3ACOL1	FALSE	0.00194	-0.219	0.803	0.56-1.16	0.237438	0.821521
bacteria	Neptunomonas phycophila	FALSE	0.00135	-0.189	0.828	0.58-1.18	0.295892	0.821521
Top 10 taxa ranked by p-value
adj.pval = FDR corrected p-value within each Kingdom

## Sheet: Sup Table 6 Ig vs. Viral Load
Supplementary Table 6. Correlation between antibodies and viral load in BAL
	SARS-CoV-2 rRT-PCR		SARS-CoV-2 sgRNA
	rho	p-value	rho	p-value
Anti-Spike
igG	-0.032	ns	-0.171	0.045
IgA	0.108	ns	-0.182	0.033
IgM	0.138	ns	-0.075	ns
Anti-RBD
igG	-0.019	ns	-0.165	0.05
IgA	0.147	ns	-0.201	0.018
IgM	0.115	ns	-0.111	ns
Neutralization EC50	0.166	ns	-0.214	0.011
Spearman rho and p-value

## Sheet: Sup Table 7 - DESeq Gene
Supplementary Table 7: Differentially expressed lower airway transcriptome
Deceased vs. ≤28 days						>28 days vs. ≤28 days						Deceased days vs. >28 days
Gene.symbol	logFC	pvalue	adj.P.Val			Gene.symbol	logFC	pvalue	adj.P.Val			Gene.symbol	logFC	pvalue	adj.P.Val
Down-regulated genes						Down-regulated genes						Down-regulated genes
RNVU1-7	-4.74685	1.2e-13	1.1e-09			RNU1-27P	-4.61965	4.8e-17	3.17e-13			HTN1	-2.8	3.7e-05	0.088
RNU1-28P	-4.70612	3.46e-13	1.1e-09			RNU1-3	-4.31835	2.03e-17	2.68e-13			STATH	-2.7	3.8e-06	0.025
RNU1-2	-4.66642	2.7e-13	1.1e-09			RNVU1-7	-4.30672	2.19e-15	7.24e-12			HTN3	-2.4	5e-05	0.088
RNU1-4	-4.51345	6.52e-13	1.66e-09			RNU1-4	-4.30058	8.63e-16	3.8e-12			ZCWPW2	-2.3	4.7e-05	0.088
RNU1-3	-4.50097	2.93e-13	1.1e-09			RNU1-2	-4.15702	1.57e-14	4.15e-11			Up-regulated genes
RNU1-1	-4.39325	8.65e-12	1.83e-08			RNU1-1	-4.11966	2e-14	4.4e-11			SNX17	0.9	0.00019	0.26
TCEAL2	-4.29509	0.000908632	0.112898			RNU1-28P	-4.09497	1.54e-13	2.91e-10			TAF3	1	6.5e-05	0.096
NYAP2	-4.05461	0.000783613	0.104723			PPP1R1B	-3.80577	5.22e-07	0.00034477			CHCHD5	1.2	5.2e-05	0.088
PPP1R1B	-4.05424	4.94e-05	0.0165194			EDNRA	-3.57271	1.35e-05	0.00348506			MRPL17	1.7	1.9e-05	0.075
RNU1-27P	-4.02323	1.04e-09	1.65e-06			RNVU1-18	-3.56316	2.16e-11	3.17e-08			COMTD1	1.9	2.3e-05	0.075
RNVU1-18	-3.83288	4.65e-10	8.44e-07			RNU4-2	-3.36415	1.1e-12	1.82e-09			ALDH7A1	2.2	9e-08	0.0012
RNA5S14	-3.08033	1.82e-05	0.00856044			NYAP2	-3.32597	0.00478529	0.107732
C12orf56	-3.07757	0.00224567	0.154508			C12orf56	-3.08552	4.99e-05	0.00855426
RNR2	-3.06155	0.000340658	0.0627157			COL6A4P2	-3.06494	0.00154943	0.0612443
SPRR2F	-3.0417	7.51e-05	0.0232575			DNM1P41	-3.04748	0.00358041	0.0935385
DSCAML1	-2.98892	0.00124516	0.124545			CCDC102A	-3.02717	7.33e-06	0.00235916
MTRNR2L5	-2.91872	2.85e-08	4.02e-05			SDK2	-2.91289	2.24e-05	0.00492149
IGHV5-51	-2.87292	0.00763822	0.250073			DSCAML1	-2.90742	9.97e-05	0.012466
MTRNR2L9	-2.86392	1.35e-06	0.00114055			TP53TG1	-2.8965	1.19e-09	1.58e-06
MTRNR2L10	-2.65643	9.65e-08	0.000122613			HDAC11	-2.89635	1.52e-07	0.000125239
PRB3	-2.54035	8.08e-05	0.0233415			NOSTRIN	-2.87322	0.000190352	0.018895
RNR1	-2.53477	0.00219827	0.153828			IL17RE	-2.86116	4.81e-05	0.00836084
FAM227B	-2.5252	9.15e-06	0.0048421			FBLN1	-2.85109	0.000521454	0.0340803
MTRNR2L7	-2.48872	2.71e-06	0.00180954			LOC100506100	-2.84318	2.1e-07	0.000162988
IGLV1-40	-2.47421	0.00778219	0.251948			ZNF154	-2.83357	2.66e-06	0.00129876
RNU4-2	-2.46246	2.13e-06	0.00150614			H19	-2.79654	4.41e-05	0.00820788
FOXN4	-2.45722	0.00652794	0.232934			FOXN4	-2.69377	5.42e-05	0.0089091
MTRNR2L1	-2.42266	0.00326913	0.179774			IGLV1-47	-2.59895	0.0029689	0.0865242
SPATA24	-2.41101	0.00173182	0.139535			TRMT9B	-2.52323	4.91e-07	0.000343768
NEURL3	-2.40853	0.0015643	0.135465			CDC25C	-2.49649	0.000750031	0.0419573
S100A7	-2.3505	0.00596688	0.226986			CDH11	-2.48441	0.00414919	0.100443
SLC25A22	-2.34565	0.00104577	0.118459			MTRNR2L5	-2.47064	1.76e-08	2.11e-05
RAB11FIP5	-2.34523	8.73e-05	0.0246496			OBSCN	-2.4539	5.87e-05	0.0089091
MTRNR2L2	-2.336	0.00573669	0.226314			ZNF677	-2.39987	7.78e-05	0.0107201
COX3	-2.32793	0.00122603	0.123605			ZC4H2	-2.38827	6.2e-06	0.00209983
CYTB	-2.32784	0.00105199	0.118459			SCHIP1	-2.36792	0.000738841	0.0415072
ANAPC2	-2.32102	0.000159086	0.0381296			EGFL6	-2.34779	0.000794663	0.0433518
SNORA11	-2.31187	0.00423894	0.200176			FOXI2	-2.34675	5.83e-05	0.0089091
ND6	-2.31107	4.38e-07	0.000505391			ANAPC2	-2.31021	1.5e-06	0.000858189
MTRNR2L8	-2.29393	0.00283452	0.172791			SCARNA2	-2.30204	3.64e-06	0.00150067
AFMID	-2.28412	9.37e-05	0.0254546			TBX3	-2.29349	0.000253931	0.0224272
ZNF860	-2.27414	0.000669549	0.0935976			PCAT19	-2.29323	0.000417491	0.0294744
PHLDB1	-2.24451	0.00116502	0.122475			SPATA24	-2.29318	0.000381528	0.0283475
RNU4-1	-2.23635	0.00111068	0.122475			IGLV6-57	-2.28334	0.0268299	0.239978
LOC100506100	-2.23333	0.000989175	0.117633			LINC00865	-2.28319	0.000294089	0.0241153
RNF212	-2.21577	0.00646358	0.23194			ZNF428	-2.27168	7.52e-08	7.64e-05
ND3	-2.21445	1.28e-06	0.00114055			MTRNR2L9	-2.24729	6.99e-06	0.00230805
ND5	-2.21006	0.0010171	0.118459			MTRNR2L7	-2.21188	7.38e-07	0.000464225
IL17RE	-2.19901	0.00593791	0.226986			CBLC	-2.19775	0.00221841	0.0733228
COX1	-2.17395	0.000636244	0.0908114			AFMID	-2.19284	5.69e-06	0.00197636
TP53TG1	-2.16062	0.000101546	0.0268738			SNORA38B	-2.17256	0.00043381	0.0302465
SLAIN1	-2.15272	1.13e-06	0.00114055			TTLL6	-2.16707	0.00052594	0.0342042
ND4	-2.14778	0.00098727	0.117633			RNR1	-2.16041	0.00748435	0.13423
MS4A3	-2.14479	5e-06	0.00302676			MYL6B	-2.14988	2.44e-06	0.0012387
MTRNR2L6	-2.12656	6.44e-06	0.00371773			JCHAIN	-2.1453	8.66e-06	0.0026597
ACTR3C	-2.12627	0.0003665	0.0646618			ADH1B	-2.135	0.000325234	0.0258382
SCARNA2	-2.12483	0.000338624	0.0627157			RNU11	-2.12586	6.1e-05	0.00915346
LOC100506885	-2.11883	0.00115017	0.122475			BNC1	-2.11888	0.00310932	0.0881355
STAP2	-2.1098	0.000233348	0.0494036			MAGI2	-2.11555	5.08e-06	0.00181395
RNY1	-2.09953	0.00363838	0.191778			FBXO27	-2.10175	0.00526821	0.11374
MTRNR2L3	-2.085	4.65e-05	0.0159732			RPP25	-2.07076	0.00182181	0.0664406
FOXI2	-2.08489	0.00141532	0.13167			MXRA5	-2.06991	0.00158447	0.0615265
ATP8	-2.08263	1.21e-05	0.00615462			PIEZO2	-2.06757	0.000468748	0.0317354
PRIMPOL	-2.07811	3.1e-05	0.0123202			ZSWIM5	-2.06526	3.57e-05	0.00693519
CFAP99	-2.06506	0.000511296	0.0773214			WDR4	-2.06107	0.000309935	0.0251028
ND4L	-2.05564	0.00248519	0.161894			ABO	-2.06078	9.81e-06	0.00281553
HTN3	-2.03543	0.0044201	0.202749			CYP2C19	-2.05733	0.000414515	0.0294216
LINC00865	-2.03349	0.00755624	0.249317			CFAP99	-2.05058	4.72e-05	0.00836084
ND2	-2.01926	0.00185189	0.140866			ZNF860	-2.03956	0.000574374	0.0356004
HDAC11	-2.00603	0.00152904	0.134885			MRO	-2.03921	0.000684899	0.0398328
WDR4	-2.00442	0.0060228	0.226986			ZNF208	-2.02954	4.34e-06	0.00168489
TPRG1	-1.98487	0.000271701	0.0539285			FMN2	-2.02594	0.00929556	0.151162
RNU5E-1	-1.98121	3.4e-05	0.0130813			RNU4-1	-2.00173	0.000138548	0.0151167
STK11	-1.97988	3.26e-06	0.00206914			PRH2	-1.99151	8.39e-05	0.0108687
MYL6B	-1.97795	0.000414129	0.0674446			PPP1R3C	-1.98723	0.000731154	0.0412509
SMAD9	-1.96021	0.00694649	0.237845			IGLV2-23	-1.98676	0.013915	0.18117
SNORA61	-1.94782	0.000423796	0.067584			SNORA11	-1.97481	0.00152524	0.0610188
ECM2	-1.93958	0.00579276	0.226986			KLF8	-1.97349	9.26e-05	0.011757
TGFBR3	-1.92901	0.00127491	0.126525			FER1L4	-1.96834	0.00246925	0.079124
ND1	-1.92259	0.00247231	0.161886			LYRM9	-1.96195	0.00106059	0.0493026
NOS2	-1.91852	0.000883907	0.111171			RAB11FIP5	-1.94853	0.000159499	0.0164508
TPTE2P2	-1.90717	0.000538749	0.0805144			OTUB2	-1.93442	6.28e-05	0.00931767
ATP6	-1.88864	0.00696516	0.237845			RNA5S14	-1.9331	0.00114726	0.0513143
SPATS1	-1.87032	0.00199752	0.14583			PITPNM3	-1.93233	0.000940189	0.0464157
BPI	-1.86767	1.27e-05	0.0061903			TMEM143	-1.92446	0.00140077	0.0577906
PHGDH	-1.84983	0.00809664	0.254332			PYCR1	-1.92163	0.00480421	0.107732
OTUB2	-1.84164	0.00393327	0.196461			RNR2	-1.91978	0.0133284	0.177559
JCHAIN	-1.83992	0.00144568	0.132119			NR2F6	-1.91616	1.12e-07	0.000105572
LYRM9	-1.83881	0.0083262	0.256096			ZFYVE19	-1.88921	1.85e-05	0.00421749
COX2	-1.836	0.00355175	0.189571			TM7SF2	-1.88821	0.000720841	0.0409765
IGHG3	-1.82935	0.00495476	0.210408			BCDIN3D	-1.88209	0.000297838	0.024272
LOC441666	-1.82293	0.00678979	0.237654			TPRG1	-1.87978	0.000102677	0.012466
CENPM	-1.81694	0.00786563	0.25195			SLC25A22	-1.86995	0.000554034	0.035141
KLHDC4	-1.81415	0.000356868	0.0638492			MAT1A	-1.86298	0.0183041	0.204048
C6orf203	-1.81346	0.000177188	0.040924			PRB4	-1.86216	0.00789543	0.13823
RYR3	-1.80552	0.00156425	0.135465			PEG3	-1.86045	0.00844426	0.143799
LRRC10B	-1.80355	0.000412919	0.0674446			DHRS11	-1.85829	0.00832666	0.142703
MIB2	-1.80086	0.00105376	0.118459			CLTRN	-1.85108	0.0306216	0.255703
METRN	-1.79492	0.0055578	0.223559			LRRC37A6P	-1.84884	0.000113261	0.0133506
HIBCH	-1.79491	2.05e-06	0.00150614			TSPAN11	-1.84812	0.0103675	0.158416
IGF1	-1.7922	0.00285659	0.172791			TPTE2P2	-1.84757	3.89e-05	0.00744579
GCSHP5	-1.79098	0.000603918	0.088179			CROCC2	-1.84745	0.000830432	0.0435229
PRDM15	-1.75549	0.00325796	0.179774			PTMS	-1.84124	1.56e-06	0.000858189
TTK	-1.75166	0.00679624	0.237654			MRPS18B	-1.83687	7.01e-05	0.010065
FAM27B	-1.75042	0.000616284	0.088962			CST6	-1.83056	0.000618436	0.0374523
CEACAM8	-1.73382	0.000382035	0.0664793			SPNS2	-1.82942	0.000701485	0.0404411
BCAS1	-1.72511	4.28e-05	0.0151117			RNF212	-1.82448	0.00768478	0.135998
RNU5A-1	-1.72275	0.00184593	0.140866			TTC23	-1.82328	0.00047564	0.0318751
RN7SL2	-1.7014	1.34e-06	0.00114055			IGHG3	-1.82248	0.000458697	0.0312151
H2AFY2	-1.70122	0.00438085	0.202749			FBXO31	-1.81374	0.000208623	0.020104
RPS6KA6	-1.69317	0.00486781	0.207884			SARS2	-1.80939	0.00207988	0.0712829
CMBL	-1.68926	0.00546986	0.222704			TRAPPC2L	-1.80607	2.31e-05	0.00492149
SMIM27	-1.68626	2.85e-05	0.0117888			PLEKHH3	-1.79891	0.00285968	0.0845533
TMEM258	-1.6828	2.88e-05	0.0117888			CSMD1	-1.7988	0.000583264	0.0357065
IGHA1	-1.68258	0.00392693	0.196461			IL33	-1.79375	2.44e-06	0.0012387
RAPGEF5	-1.67717	0.00236451	0.15938			DHFR	-1.7869	1.21e-06	0.000724779
MAATS1	-1.67072	0.000269976	0.0539285			MDK	-1.78679	7.8e-05	0.0107201
PART1	-1.66802	0.00683574	0.237654			TPPP	-1.78661	0.000154587	0.0160698
SYTL1	-1.66119	0.000213263	0.0459166			ZC3HAV1L	-1.78606	4.68e-05	0.00836084
GATM	-1.65283	0.000721463	0.0985456			KLHDC4	-1.78203	5.61e-05	0.0089091
MRPL1	-1.64995	0.000425626	0.067584			RHOV	-1.78097	0.000145753	0.0155025
C19orf70	-1.64968	0.00114652	0.122475			PHLDB1	-1.77914	0.00216023	0.0723843
ERICH5	-1.64371	0.00198515	0.145765			WDR34	-1.77902	0.000106103	0.0127343
ZSWIM5	-1.6362	0.0079719	0.253168			VGLL3	-1.77434	0.000547747	0.0351037
CXXC1	-1.63568	6.2e-05	0.0197033			PMVK	-1.774	1.52e-05	0.00372079
ANKRD18A	-1.63476	0.00113923	0.122475			RASIP1	-1.77349	0.0213781	0.21811
LLGL1	-1.63276	0.0054058	0.221516			FAM27B	-1.76152	5.82e-05	0.0089091
WDR34	-1.63188	0.00309725	0.174864			VANGL2	-1.75872	0.00310392	0.0881355
LRRC37A6P	-1.63145	0.0047231	0.207884			CNGA1	-1.75406	0.0041605	0.100443
RSPO1	-1.62669	0.000398336	0.0674446			MTRNR2L10	-1.74622	0.000115052	0.0134387
ZNF678	-1.62617	0.000144396	0.035966			UBL7-AS1	-1.73963	0.00312721	0.0881355
SPARCL1	-1.62177	0.00619142	0.229299			PRDM15	-1.73905	8.35e-05	0.0108687
RNU5B-1	-1.62106	5.12e-05	0.0166838			KRT78	-1.73899	0.00351729	0.0935091
ZC3HAV1L	-1.61724	0.00501888	0.21181			MTRNR2L1	-1.73784	0.0242947	0.230946
ABO	-1.60633	0.0083704	0.256215			IGKV1D-12	-1.73759	0.0210348	0.216888
MAGI2	-1.60478	0.00484812	0.207884			LIG1	-1.73725	0.000357506	0.0271248
TRGC2	-1.60375	0.000299122	0.0584577			C1orf210	-1.73686	0.0144738	0.183382
POLR3B	-1.58979	0.000478359	0.073212			TUSC1	-1.73322	0.00440815	0.102752
TPRKB	-1.58447	0.000151851	0.0370956			TMEM63C	-1.71911	0.00929735	0.151162
2021-09-05	-1.58231	0.00846396	0.257219			COMTD1	-1.71886	0.00057146	0.0355869
CGN	-1.58144	0.00100011	0.117633			IGLV1-40	-1.71438	0.0240174	0.229818
TCEA3	-1.57043	0.00161729	0.137883			BPI	-1.71038	6.66e-05	0.00976642
ALDH6A1	-1.56202	0.00262028	0.166427			TMEM42	-1.70774	0.000853572	0.0439143
WDR89	-1.54759	0.000810398	0.105046			HIBCH	-1.70686	3.94e-08	4.34e-05
RN7SL1	-1.54187	8.73e-06	0.00481911			SYTL1	-1.70241	4.95e-07	0.000343768
SPRR1B	-1.54105	0.00220041	0.153828			MTRNR2L3	-1.69884	0.000130263	0.0146388
PTPN13	-1.53817	2.47e-05	0.0111857			IGHA1	-1.69847	0.000326843	0.0258382
CRIP2	-1.53565	0.00779225	0.251948			CHAF1A	-1.69831	1.49e-07	0.000125239
PEX7	-1.5308	0.00548914	0.222775			FOXP2	-1.69183	3.26e-06	0.00144939
ZNF782	-1.51911	0.00459501	0.207884			KLHDC7A	-1.68423	0.00902937	0.149194
TMA7	-1.51531	1.84e-06	0.00146026			C15orf62	-1.68246	0.0058321	0.11917
TOM1L1	-1.51308	0.0030671	0.173935			FOXQ1	-1.67626	0.00217174	0.0725856
MTRNR2L4	-1.5093	0.0030396	0.173148			ARL4D	-1.67215	0.00304827	0.0879472
C17orf75	-1.5018	0.00582772	0.226986			MTRNR2L8	-1.67054	0.0171976	0.198464
TMEM212	-1.49741	0.00340104	0.183608			ACTR3C	-1.67006	0.000351284	0.0269631
MAPK8IP1	-1.49475	0.00292413	0.172791			LOC728554	-1.66876	0.000131926	0.0146388
CCDC30	-1.49088	0.000191968	0.0427819			ZNF782	-1.66749	0.000101699	0.012466
IRX3	-1.4882	0.00286497	0.172791			CENPM	-1.66446	0.00325646	0.0899409
DNAL4	-1.48778	0.00318239	0.177425			AFAP1L2	-1.66441	0.000551813	0.035141
ZNF428	-1.48331	0.00639791	0.231036			TMEM40	-1.66195	0.00212195	0.0720155
TPD52	-1.48206	9.42e-05	0.0254546			DAPL1	-1.66194	0.0264921	0.238411
MUC12	-1.47633	0.00734918	0.245675			ZNF253	-1.65842	0.000102215	0.012466
GIPC1	-1.47259	0.000791417	0.104723			ANKRD18A	-1.65495	9.51e-06	0.00278982
ADGRV1	-1.47008	0.00117235	0.122475			FAM27E2	-1.65177	0.00592712	0.119209
CACNB4	-1.46639	0.00413654	0.197543			CLBA1	-1.65169	0.00146503	0.0597871
FAM86DP	-1.465	0.00379388	0.196461			TMEM47	-1.6497	0.00479161	0.107732
FBXO25	-1.46389	0.00190751	0.14338			IGHG2	-1.64535	0.000254815	0.0224272
ANKRD36C	-1.4632	2.61e-05	0.0114249			SPARCL1	-1.64351	0.00175549	0.0652844
WDR75	-1.46193	0.00182482	0.140866			MAPK15	-1.63673	0.0123276	0.170418
NR2F6	-1.46163	0.00136521	0.130393			SLC25A26	-1.63633	8.92e-05	0.0114387
TCTEX1D1	-1.44818	0.0037033	0.194393			FGFBP1	-1.63493	0.00352023	0.0935091
ARHGEF35	-1.44206	0.000450005	0.0697124			SPATS1	-1.62525	0.00180696	0.0661899
RABL6	-1.43308	8.05e-05	0.0233415			HYKK	-1.62499	0.00418048	0.100443
NKX3-1	-1.43219	0.00275932	0.171821			KCTD14	-1.62413	0.00629515	0.122742
SMIM31	-1.4291	0.00835556	0.256215			MTRNR2L4	-1.62123	3.15e-05	0.00630472
POLD2	-1.42679	0.00333649	0.182192			C1orf115	-1.62031	0.0011087	0.0504853
LRRC23	-1.42552	0.000256939	0.0534061			GATA6	-1.6203	0.00911236	0.149443
LINC00467	-1.42334	0.00749045	0.248804			THAP10	-1.61868	0.00164314	0.0626959
MUC16	-1.42173	0.000763501	0.103178			CDC20	-1.61562	0.0021448	0.0722337
HSPB11	-1.42064	0.000988303	0.117633			DDX11	-1.61455	0.0024787	0.0792027
TARS2	-1.41765	0.00688204	0.237654			LINC00665	-1.61412	0.0140556	0.181695
RPL23AP53	-1.41716	0.00148377	0.132735			MIB2	-1.61288	0.000584199	0.0357065
SOBP	-1.41607	0.00754509	0.249317			IRX3	-1.61251	8.4e-05	0.0108687
LCA5	-1.41245	0.00103458	0.118459			ADCY2	-1.6118	0.00484039	0.107762
MOK	-1.41226	0.00726829	0.244257			CCDC178	-1.61135	0.00966041	0.153474
PSPH	-1.40452	0.0029303	0.172791			POLR3B	-1.60983	3.25e-05	0.00639717
CEP76	-1.39534	0.00807738	0.254332			CXXC1	-1.60967	3.29e-06	0.00144939
TFF3	-1.39391	0.00245047	0.161287			USP43	-1.60687	0.00310901	0.0881355
CHAF1A	-1.39207	0.00120127	0.123062			SKIDA1	-1.60454	0.0195347	0.208486
CLIC6	-1.39125	0.000704193	0.0972322			LINC01133	-1.60311	0.00199625	0.0698103
LINC00987	-1.39123	0.00296532	0.172791			LDLRAP1	-1.60307	0.000393292	0.0284076
THRB	-1.3765	0.00257577	0.164422			POU2AF1	-1.6028	0.00762698	0.135703
CA5B	-1.3723	0.00169395	0.138975			TTC16	-1.59926	0.00580834	0.11917
VWA3A	-1.36794	0.00601312	0.226986			NOS2	-1.59703	0.000661875	0.0391107
ZNF14	-1.35626	0.00531265	0.221267			IQCH-AS1	-1.59457	0.00208957	0.0712829
CDCA7L	-1.34984	0.006402	0.231036			LRP5	-1.58748	0.00138324	0.0574947
ZNF626	-1.34783	0.00409434	0.197543			HRH1	-1.58659	0.000903307	0.0456914
ST6GALNAC6	-1.34534	0.00442111	0.202749			SUSD4	-1.58648	0.00589703	0.11917
CCDC124	-1.3426	0.00571984	0.226314			CEP76	-1.57834	0.000274557	0.0233852
ERICH3	-1.33689	0.00196016	0.145687			CCS	-1.57561	0.000992279	0.0478313
LSM1	-1.33071	0.00687939	0.237654			C1orf226	-1.57101	0.00707778	0.129858
FBL	-1.32836	0.00242678	0.16056			ZNF584	-1.56991	0.00420671	0.100443
HMG20A	-1.31887	0.00469969	0.207884			FTO-IT1	-1.56385	0.0109993	0.162613
MAPK10	-1.31614	0.00342941	0.183814			TMEM213	-1.55284	0.0142165	0.181866
GUCY2C	-1.30768	0.00459993	0.207884			SMAD9	-1.54829	0.00723897	0.131931
RP9P	-1.30638	0.00147691	0.132735			RORC	-1.54683	0.00101667	0.0482807
DZIP1L	-1.30546	0.00603514	0.226986			DLEC1	-1.5462	0.000358041	0.0271248
IRF6	-1.29047	0.00572055	0.226314			PRIMPOL	-1.5453	0.00021454	0.0204092
ZNF487	-1.2889	0.00631771	0.231036			PHGDH	-1.54334	0.00908785	0.149412
MRPL36	-1.28853	0.00152515	0.134885			HEY2	-1.54039	0.0101251	0.156642
ARHGAP11A	-1.28403	0.00375689	0.196394			MMACHC	-1.53841	0.00207228	0.0712829
SPRYD3	-1.28021	0.00691436	0.237654			TDRP	-1.53705	0.0170884	0.198324
SPA17	-1.27955	0.00156824	0.135465			TPRKB	-1.53487	2.8e-06	0.00131797
RAB40C	-1.27761	0.00762817	0.250073			EPS8L2	-1.53221	0.000121635	0.0139637
MUC4	-1.27335	0.0018321	0.140866			MUC16	-1.53106	1.07e-05	0.00288463
BAALC	-1.27159	0.00689507	0.237654			SPRR2D	-1.53085	0.00396672	0.0991831
H2AFX	-1.26943	0.00539457	0.221516			MTRNR2L6	-1.52945	0.000263139	0.0227056
ANKRD36	-1.26308	0.00020483	0.0448612			MOK	-1.52191	0.000404688	0.0288794
DIXDC1	-1.25701	0.00484545	0.207884			PTRH1	-1.52018	0.00250178	0.0795867
UBA5	-1.24706	0.000340383	0.0627157			IGKV4-1	-1.51933	0.0178449	0.20261
DNAJA4	-1.24557	7.84e-05	0.0233415			C10orf67	-1.51832	0.00317229	0.0887
ABHD10	-1.24545	0.00288739	0.172791			H2AFY2	-1.51777	0.000924782	0.0460716
GNA11	-1.24449	0.00808378	0.254332			CLCA4	-1.51524	5.8e-05	0.0089091
ZMYND10	-1.23641	0.00689879	0.237654			HAUS5	-1.51486	0.00317192	0.0887
DEFA3	-1.23231	0.00779465	0.251948			PEX10	-1.51291	0.00292321	0.0855702
ARFGEF3	-1.22561	0.00219773	0.153828			LRRC56	-1.51281	0.0112915	0.164384
AAMP	-1.21606	0.00227191	0.154508			MUC12	-1.51187	0.00057834	0.0356787
GTF2H5	-1.21452	0.00601616	0.226986			OXTR	-1.51133	0.0101327	0.156642
RAI14	-1.21178	0.00180713	0.140866			LGSN	-1.51079	0.0224052	0.221734
DMD	-1.20107	0.00411051	0.197543			RNA5S8	-1.50887	0.02023	0.212471
ZSCAN32	-1.19581	0.0063731	0.231036			IGF1	-1.50617	0.00258749	0.0805831
GRAMD2B	-1.19528	0.0023964	0.15938			RPARP-AS1	-1.50583	0.00123895	0.0538045
RPPH1	-1.18013	0.00100001	0.117633			FMO3	-1.505	0.00116287	0.0514993
SNTN	-1.17991	0.00393094	0.196461			UGT2A1	-1.50491	0.00174523	0.0652706
NOL12	-1.17453	0.00654958	0.233051			MUM1	-1.50434	0.000332332	0.0259452
ARHGAP29	-1.17332	0.00538546	0.221516			LOC100506885	-1.50356	0.00384777	0.0973147
PPL	-1.16933	0.00301643	0.173148			PADI1	-1.50349	0.00676373	0.127201
AUTS2	-1.16741	0.00841079	0.256832			SCGB2A1	-1.49429	0.00864774	0.145808
LRRCC1	-1.15964	0.00617181	0.229241			KIAA1211L	-1.49374	0.000189998	0.018895
YES1	-1.15456	0.00142642	0.13167			PPL	-1.48651	3.48e-06	0.00148387
HES1	-1.15391	0.000260661	0.0534061			LRRC1	-1.48474	7.43e-05	0.0104384
MAL2	-1.15217	0.00441754	0.202749			LOC100130345	-1.48221	0.0156869	0.191088
NOL11	-1.15148	0.00701931	0.238412			CEACAM7	-1.47818	0.0131334	0.176385
GOLPH3L	-1.14792	0.00166926	0.138975			ZNF165	-1.47666	0.00132695	0.0565109
S100A14	-1.14573	0.00167453	0.138975			CFAP100	-1.47203	0.00264838	0.0813364
MRPL20	-1.13884	0.00822616	0.254555			TGFBR3	-1.46977	0.00455206	0.104515
DPH5	-1.13705	0.00806241	0.254332			ATP7B	-1.46866	1.22e-05	0.00322782
AKAP12	-1.13489	0.00358773	0.189895			PSCA	-1.46756	0.000812266	0.0434151
SIK1	-1.13353	0.00397738	0.196594			ZNF512B	-1.46481	0.00347945	0.0929872
TYW3	-1.12548	0.00408328	0.197543			RNU5A-1	-1.46385	0.0018563	0.0671423
UACA	-1.12446	0.00396	0.1965			CREB3	-1.46098	1.71e-05	0.00401186
SLC9A3R2	-1.11927	0.00791372	0.25195			2021-09-05	-1.46058	0.00116636	0.0514993
DNAH12	-1.11487	0.00615126	0.229148			CCDC114	-1.45866	0.00419839	0.100443
ATAD2	-1.1127	0.00341113	0.183608			BCAS1	-1.45761	1.47e-05	0.00372079
CYB5A	-1.11047	0.00238488	0.15938			GJB5	-1.45676	0.0270281	0.240856
KRT19	-1.10895	0.0038368	0.196461			UBE2Q2P2	-1.45651	0.00755959	0.13505
MRPS10	-1.10575	0.000441676	0.0692667			CCDC153	-1.45501	0.00240781	0.0775316
NUDT21	-1.10554	0.000175196	0.040924			BBOX1	-1.45351	0.0240228	0.229818
BCL7B	-1.10096	0.00273816	0.171749			ZNF749	-1.45069	0.0116385	0.166547
CEACAM5	-1.09533	0.00761322	0.250073			NFASC	-1.45031	0.0197079	0.20902
HDGFL2	-1.09248	0.00487676	0.207884			MUC21	-1.44782	0.00535763	0.114327
LTF	-1.09202	0.00181805	0.140866			COL7A1	-1.44451	0.0063841	0.123041
SERPINB3	-1.0895	0.00700607	0.238412			STAP2	-1.44293	0.00408502	0.100443
WFDC21P	-1.08314	0.00622918	0.230027			ATP8	-1.43687	0.00047508	0.0318751
TSC2	-1.08032	0.00817699	0.254332			MUC4	-1.43539	1.68e-05	0.00401186
ZNF273	-1.08032	0.004001	0.196995			ZNF334	-1.43479	0.00236179	0.0766938
WDR66	-1.07658	0.00637063	0.231036			D2HGDH	-1.43309	0.00171961	0.0645705
ANKRD26	-1.06694	0.00118374	0.122475			GSTA4	-1.43272	0.0118737	0.167505
BACE2	-1.06432	0.00562863	0.224844			FGF12	-1.4325	0.0207576	0.215442
SOD1	-1.06067	0.00141756	0.13167			XDH	-1.43227	0.0112366	0.16428
NDUFA5	-1.05926	0.00173554	0.139535			IGHG4	-1.43086	0.0234607	0.227073
ALMS1	-1.05459	0.00196115	0.145687			TRNP1	-1.42721	0.00157812	0.0615265
LRRC37A4P	-1.05272	0.00470577	0.207884			SPRR2A	-1.4256	0.00533787	0.114215
SELENOW	-1.0463	0.00294833	0.172791			RPL23AP53	-1.42338	7.11e-05	0.0100995
CPEB3	-1.04474	0.00382079	0.196461			NUAK1	-1.42198	0.00687316	0.12822
TSHZ2	-1.04455	0.0031438	0.176706			ACSS1	-1.42037	0.00148536	0.0600471
AHCY	-1.04414	0.00817183	0.254332			EPS8L1	-1.42033	0.000556315	0.035141
TGM2	-1.04084	0.00272607	0.171749			C15orf61	-1.41851	0.00463722	0.105553
EVI5	-1.03558	0.000352267	0.0638492			TSR1	-1.41822	4.68e-05	0.00836084
UBE2M	-1.03228	0.00598465	0.226986			ROBO1	-1.41712	0.000441522	0.0305182
CHCHD7	-1.02585	0.000670501	0.0935976			DZIP1L	-1.41275	0.000429286	0.0301459
ARL4C	-1.02454	0.00725425	0.244257			CFAP157	-1.41172	0.00175413	0.0652844
NDUFB1	-1.01728	0.00301652	0.173148			IGFBP5	-1.41107	0.000829525	0.0435229
DNAJC19	-1.01499	0.00603961	0.226986			LOC100506411	-1.41022	0.0166897	0.196204
ZNF675	-1.01098	0.00581613	0.226986			IGHM	-1.40701	0.015741	0.191088
TEAD1	-1.00781	0.00303019	0.173148			CMSS1	-1.4065	0.000389408	0.0284076
MTFR1L	-1.00366	0.00455033	0.207884			ECM2	-1.40594	0.0192752	0.207611
EIF3E	-1.00131	0.00274463	0.171749			PKD1	-1.40389	0.000778181	0.0428064
RBM15B	-1.00113	0.00295366	0.172791			SPATA6L	-1.40165	0.00330811	0.0909608
BMI1	-1.00007	0.00318452	0.177425			DCUN1D4	-1.40135	4.62e-06	0.0017422
AFDN	-0.997634	0.00392861	0.196461			ZNF606	-1.4011	0.00248371	0.0792027
EBNA1BP2	-0.995357	0.00521422	0.218601			LRRC61	-1.40031	0.00461789	0.105294
CHD6	-0.993899	0.00147922	0.132735			ADPRHL1	-1.39836	0.0181432	0.203373
KDM1A	-0.985976	0.00394376	0.196461			ERCC2	-1.38834	0.0121092	0.16917
G0S2	-0.983908	0.00634914	0.231036			SPRR1A	-1.38672	0.0134238	0.17834
DAAM1	-0.982682	0.00294284	0.172791			RRM2	-1.38656	0.0016165	0.0619813
IFT80	-0.976703	0.0078355	0.25195			RYR3	-1.38629	0.00480936	0.107732
POLR2D	-0.97658	0.00477502	0.207884			PRSS27	-1.38618	0.0228261	0.224219
CCNC	-0.975361	0.00466761	0.207884			CXorf56	-1.38547	0.00107207	0.049436
ZNF43	-0.974855	0.00128665	0.1267			ND3	-1.3848	0.000660813	0.0391107
PBLD	-0.966253	0.00517477	0.217666			TMEM258	-1.38458	1e-05	0.00281927
UPF3A	-0.964965	0.0047363	0.207884			DIAPH3	-1.38264	0.00110898	0.0504853
CCP110	-0.956332	0.00553254	0.223559			SNORD17	-1.38244	0.000532948	0.0344901
RPL6	-0.950965	0.00533347	0.221409			CGN	-1.38083	0.000848922	0.0439143
SYTL2	-0.94743	0.00412583	0.197543			CCDC88B	-1.38031	1.5e-05	0.00372079
RPL34	-0.945808	0.00562801	0.224844			IGHG1	-1.37926	0.00376862	0.095923
ARL1	-0.944916	0.00177062	0.140866			LRRC10B	-1.37907	0.00137355	0.0574947
HOOK2	-0.934159	0.00750153	0.248804			CORO2B	-1.37823	0.0202544	0.212559
MRPL33	-0.926579	0.00225623	0.154508			DNAH2	-1.37745	0.00211421	0.0719376
EHF	-0.921387	0.00818876	0.254332			PSPH	-1.37684	7.9e-05	0.0107454
ANKRD11	-0.911922	0.000118063	0.029995			NPIPA5	-1.37616	0.000245875	0.0220234
RPL35A	-0.910128	0.00387182	0.196461			AFDN	-1.37486	9.25e-06	0.00277611
ACADM	-0.905219	0.00465112	0.207884			LOC145783	-1.37444	0.0170136	0.198072
FNBP1L	-0.900763	0.00815293	0.254332			DHRS4L2	-1.37359	0.00120176	0.0525352
COMMD6	-0.900363	0.00135651	0.130393			ICA1	-1.37267	4.78e-05	0.00836084
ANP32E	-0.897995	0.00185069	0.140866			NXN	-1.36886	0.00207386	0.0712829
TPT1	-0.897284	0.00188047	0.142188			GOLGA2P5	-1.36736	0.00449064	0.103807
SMIM14	-0.893976	0.00169576	0.138975			CRACR2B	-1.36723	0.00489925	0.108342
CCDC50	-0.886345	0.00828996	0.2556			SLC6A20	-1.36718	0.0302827	0.254459
SNRPE	-0.875384	0.00770238	0.25088			COQ5	-1.36321	0.000188999	0.018895
PSMB4	-0.874111	0.00335613	0.182192			TCIM	-1.36281	0.00172162	0.0645705
CRYBG3	-0.873124	0.00404989	0.197543			GPR135	-1.36235	0.0182848	0.204048
NDUFB10	-0.867812	0.00658459	0.233643			TYW3	-1.3622	6.93e-05	0.0100491
RALGPS2	-0.867736	0.00573228	0.226314			PPAT	-1.36146	0.00255	0.080155
PABPC3	-0.866022	0.000191693	0.0427819			UMODL1-AS1	-1.3613	0.0309451	0.257121
RPRD1A	-0.865115	0.00253015	0.163982			LOC100506076	-1.35917	0.00047811	0.0318788
ATP5PO	-0.863714	0.00283088	0.172791			GRAMD2B	-1.35839	2.34e-05	0.00492149
COX7A2	-0.861652	0.00284234	0.172791			FAXC	-1.35826	0.0203717	0.213306
TRIR	-0.859944	0.00583966	0.226986			SPRR1B	-1.35509	0.0034449	0.0926356
SREK1IP1	-0.857865	0.00164289	0.138975			ARHGEF35	-1.35261	0.000148875	0.0155988
NRBF2	-0.85036	0.00440033	0.202749			ADGRV1	-1.35067	0.000699495	0.0404411
IPO5	-0.844925	0.00643451	0.231551			MRPL36	-1.35038	0.000142198	0.0152626
SH3D19	-0.84425	0.00590421	0.226986			ZNF324	-1.35006	0.0105015	0.15922
CASP3	-0.836575	0.00858789	0.259743			TMEM212	-1.3478	0.000802304	0.0434151
UAP1	-0.832378	0.00486602	0.207884			PMFBP1	-1.34732	0.00797032	0.139002
RAB33B	-0.832316	0.00207463	0.150594			SNRNP25	-1.34672	0.00274783	0.0827293
DCUN1D4	-0.829323	0.00496909	0.210408			SNORA12	-1.34593	0.0110944	0.163287
FBXW11	-0.828215	0.00091541	0.112898			FAM102A	-1.3451	0.000563988	0.0354561
BORCS7	-0.825761	0.00615011	0.229148			RPPH1	-1.34407	1.07e-05	0.00288463
CMPK1	-0.818738	0.00466679	0.207884			BAIAP3	-1.34118	0.0141787	0.181736
H3F3C	-0.806533	0.00539944	0.221516			BCL7C	-1.33904	0.00505553	0.110869
CLTB	-0.805053	0.00852872	0.258569			RNU5B-1	-1.33839	0.000214883	0.0204092
ACIN1	-0.793248	0.0022745	0.154508			DCDC2B	-1.33729	0.0023028	0.0752514
TPI1	-0.782189	0.00639407	0.231036			TMPRSS11E	-1.33679	0.0165252	0.195314
NUMA1	-0.78197	0.00238511	0.15938			CDRT4	-1.33549	0.0142639	0.182221
SLAIN2	-0.781173	4.27e-05	0.0151117			PDE10A	-1.33531	0.0161715	0.193842
CCDC59	-0.771132	0.00605788	0.227001			LINC00886	-1.33381	0.0190078	0.206677
TMEM59	-0.7502	0.00677981	0.237654			CLDN16	-1.3311	0.0134889	0.178454
BAP1	-0.733871	0.00767833	0.25074			SLC35D2	-1.32963	5.51e-05	0.0089091
NEDD8	-0.728707	0.00115553	0.122475			KRT16	-1.32775	0.0152282	0.187891
TCF25	-0.718221	0.00334765	0.182192			ZNF204P	-1.32434	0.00488813	0.108342
EFHD2	-0.714129	0.00737833	0.246002			PTTG1	-1.31773	0.00657631	0.125645
PABPC1	-0.709535	0.0017219	0.139535			FGFR3	-1.31669	0.0027254	0.0824464
GPS2	-0.706707	0.00419763	0.198964			PGLYRP1	-1.31621	0.00449761	0.103807
HIGD1A	-0.701573	0.00142724	0.13167			CACNB1	-1.3154	0.02902	0.250149
NCL	-0.683225	0.00326645	0.179774			NXF2	-1.31453	0.029941	0.253548
CALM2	-0.67898	0.00296111	0.172791			TSTD2	-1.31448	0.00208438	0.0712829
POLR2J	-0.675234	0.00379386	0.196461			RHPN1	-1.31434	0.013954	0.181375
CGGBP1	-0.673414	0.00435845	0.202749			ZNF678	-1.31428	0.000224438	0.0208664
OSTF1	-0.67186	0.0054335	0.221935			PTGFR	-1.30954	0.000808452	0.0434151
CCDC66	-0.650587	0.00476105	0.207884			STON2	-1.30389	0.00353246	0.0935385
ZDHHC2	-0.597949	0.00845399	0.257219			NEURL4	-1.30311	0.00460388	0.105294
RAB2A	-0.581413	0.00689153	0.237654			MRPL2	-1.30305	0.00499977	0.110195
MORF4L2	-0.577318	0.00215911	0.153828			CHCHD4	-1.30096	0.00345328	0.0926356
JUND	-0.575529	0.00431503	0.202749			TTLL9	-1.30048	0.0242849	0.230946
GTF2IP1	-0.568653	0.00790404	0.25195			SMAD1	-1.29942	0.00214419	0.0722337
ATRX	-0.545101	0.0039238	0.196461			SPTLC3	-1.29853	0.0140403	0.181695
ANKRD17	-0.535768	0.00357895	0.189895			LARGE1	-1.29455	0.0232033	0.225907
BRWD3	-0.534464	0.00525887	0.219748			RN7SL1	-1.2916	4.16e-06	0.00166272
THAP5	-0.52878	0.00131239	0.128241			HDGFL2	-1.29055	0.00025994	0.0225771
STAU1	-0.456308	0.00463084	0.207884			ZC3H7B	-1.29032	0.000165413	0.0169285
Up-regulated genes						VWA3A	-1.28853	0.00207606	0.0712829
STOM	0.506347	0.00789513	0.25195			POLD2	-1.28786	0.00131824	0.0565109
AFTPH	0.512721	0.00587113	0.226986			GPALPP1	-1.28781	0.00116263	0.0514993
CTSB	0.569087	0.0064982	0.232526			SVEP1	-1.28774	0.00219815	0.0729144
RNASET2	0.605472	0.00823601	0.254555			MIR205HG	-1.28772	0.0129232	0.175389
UPP1	0.642328	0.00463762	0.207884			SDK1	-1.28435	0.00415756	0.100443
PLP2	0.654635	0.00599393	0.226986			NHSL1	-1.28281	0.000279128	0.0234855
DRAM1	0.727758	0.00211291	0.152502			SLAIN1	-1.28255	0.000258494	0.0225771
USB1	0.749104	0.00556126	0.223559			FAM83H	-1.28058	0.00434083	0.101785
PSMA5	0.883571	0.00403892	0.197543			FDX2	-1.27984	0.00847586	0.144013
CCL2	0.941122	0.00301815	0.173148			ZNF358	-1.2798	0.0100921	0.156642
LILRB1	0.943598	0.0048695	0.207884			IGHA2	-1.27723	0.0160386	0.193195
TFPI	0.965375	0.00789142	0.25195			TTK	-1.27522	0.0169196	0.197524
CYP1B1	0.979347	0.00417249	0.198514			HOXB2	-1.27515	0.00705952	0.129805
NAB2	1.01167	0.00408638	0.197543			ND6	-1.27506	0.00348875	0.0930473
SLC39A8	1.0244	0.00114177	0.122475			ATG9B	-1.27348	0.00156069	0.0613836
LAIR1	1.13066	0.000407912	0.0674446			MIPOL1	-1.2723	0.0069576	0.128828
FAM20C	1.16854	0.00813049	0.254332			CENPW	-1.27223	0.00870815	0.146266
IL3RA	1.21327	0.00704984	0.238811			PRR4	-1.27192	0.0189848	0.206677
DRAP1	1.22194	0.00254909	0.164371			SPAG5	-1.26948	0.00137691	0.0574947
SLC25A11	1.22265	0.00480821	0.207884			UBXN10	-1.26852	0.000567912	0.0355336
RNASE2	1.24112	0.00687271	0.237654			WDR75	-1.26691	0.000768017	0.0426023
VSIG4	1.26907	0.00197827	0.145765			ANK2	-1.26641	0.0263312	0.237959
CD163	1.27124	0.000591377	0.0873519			ECI2	-1.26626	0.0038977	0.0980143
CXCL5	1.2735	0.00386289	0.196461			CIAPIN1	-1.26444	0.00494795	0.109235
TPST1	1.28555	4.16e-05	0.0151117			WDCP	-1.26421	0.0141342	0.181695
MILR1	1.36634	0.00439553	0.202749			ZNF812P	-1.26124	0.0182856	0.204048
FLVCR2	1.36809	0.00167807	0.138975			C3orf14	-1.26018	0.00305644	0.0879472
PTX3	1.40372	0.0071363	0.241097			OPHN1	-1.25971	0.0015479	0.0612443
NKG7	1.49081	0.00220394	0.153828			YES1	-1.25948	0.000452146	0.0309287
CD33	1.49533	0.00729548	0.244524			C6orf203	-1.25889	0.000992694	0.0478313
HGF	1.50196	0.00631627	0.231036			PARD3	-1.25642	8.02e-05	0.0107934
AMPH	1.53692	0.00295439	0.172791			SNED1	-1.25639	0.0130326	0.175389
OLIG1	1.5755	0.00217177	0.153828			ATP5IF1	-1.25621	3.09e-05	0.0062848
NIPA1	1.58383	0.00256204	0.164372			ARHGEF34P	-1.25481	2.35e-05	0.00492149
IL1RL1	1.59333	0.000805336	0.105046			MRPL51	-1.25452	8.44e-06	0.00265189
NR1H3	1.60984	0.000412223	0.0674446			ZNF286B	-1.25374	0.0188047	0.206001
ZNF699	1.69754	0.00596644	0.226986			FAM135A	-1.25202	5.38e-05	0.0089091
TMEM121B	1.74235	0.00134542	0.130393			CYP2F1	-1.25164	0.00186856	0.0674009
GLDN	1.85371	0.00692215	0.237654			KIF19	-1.25157	0.009861	0.155167
CD163L1	1.88012	0.00143041	0.13167			SNORA68	-1.2511	0.00204386	0.0710079
CLEC1B	1.88108	0.00121784	0.123605			AIFM2	-1.25088	0.00194241	0.068411
OLIG2	1.91804	0.0011859	0.122475			PFKM	-1.24791	0.00236437	0.0766938
CCL8	1.96653	0.00225117	0.154508			SMIM27	-1.24708	0.000382204	0.0283475
ALOX15B	2.0493	0.00157828	0.135465			GPRC5B	-1.24521	0.0284546	0.247228
C1S	2.07075	0.000313421	0.0603241			LRRC73	-1.24504	0.0220684	0.220903
ITGB3	2.07131	0.000878	0.111171			MCM3	-1.24331	0.0020569	0.0712736
CLEC12B	2.16914	0.00086837	0.111171			PRXL2A	-1.2402	0.00398395	0.0994257
GJA1	2.21816	0.00180068	0.140866			GUCY2C	-1.23952	0.00180992	0.0661899
CYYR1	2.28419	0.000109693	0.0284373			MVD	-1.23779	0.000641013	0.0384666
						CFAP46	-1.2371	0.0190208	0.206677
						KRT80	-1.23662	0.005648	0.117289
Data shown: = FDR adjusted p<0.25						TARSL2	-1.23571	0.0076814	0.135998
						PTPN3	-1.23354	0.00044594	0.030663
						WDR90	-1.23241	0.0223809	0.221734
						ECM1	-1.23115	0.00833387	0.142703
						MAATS1	-1.22985	0.000991185	0.0478313
						SLC9C2	-1.22804	0.0144318	0.1832
						INAVA	-1.22637	0.00433106	0.101785
						NOA1	-1.2256	0.00139754	0.0577906
						PSMD3	-1.22524	0.000292933	0.0241153
						FOPNL	-1.22407	0.000102923	0.012466
						STXBP1	-1.22365	0.00288347	0.0849722
						NOL12	-1.22146	0.00031845	0.0254799
						NUPL2	-1.22065	0.00105686	0.0493026
						ZNF827	-1.2182	0.0022451	0.0739146
						SIK1	-1.2166	0.00023041	0.0212719
						MRPL4	-1.21633	0.00354909	0.0935385
						MALL	-1.21579	0.00529689	0.113868
						ZG16B	-1.21544	0.0102386	0.157541
						ANKRD16	-1.21271	0.0148616	0.185974
						REXO4	-1.21024	0.010303	0.15798
						FAM227B	-1.20979	0.013559	0.178454
						SERPINB4	-1.20973	0.000674992	0.0396055
						POLR3H	-1.20611	0.00188821	0.0679243
						AASS	-1.20602	0.00135211	0.0571871
						PRR29	-1.20513	0.00674186	0.127151
						LRRC43	-1.20243	0.0195605	0.208593
						ATP6V0E2	-1.20201	0.022087	0.220903
						DNAH10	-1.20148	0.00265682	0.0813812
						EGFR	-1.20146	0.00603668	0.119844
						TSPYL5	-1.20135	0.0108493	0.16183
						CUL7	-1.19844	0.000910637	0.0457119
						TARS2	-1.19689	0.00544184	0.114611
						LSP1P4	-1.19608	0.00669612	0.1267
						MOCS2	-1.19542	0.00362655	0.0936942
						SCAF1	-1.19539	0.00049854	0.0329086
						WDR24	-1.19452	0.0103972	0.158502
						HSD17B10	-1.1937	0.00253761	0.0801473
						CEP170B	-1.19145	0.00345927	0.0926356
						ZRANB3	-1.19108	0.00615958	0.121371
						RAB36	-1.1907	0.00258803	0.0805831
						CYP4X1	-1.18867	0.013539	0.178454
						TRIM62	-1.18822	0.0101117	0.156642
						RN7SL2	-1.18698	0.000111352	0.0132439
						RP1	-1.18686	0.0218428	0.219566
						KRT5	-1.1865	0.00307102	0.0879472
						VPS4A	-1.18609	0.000350663	0.0269631
						HSPA2	-1.1859	0.0028342	0.0844948
						ZNF418	-1.18527	0.0126379	0.173617
						ALPK3	-1.18525	0.00414148	0.100443
						ZNF420	-1.18507	0.00789526	0.13823
						COPS7B	-1.18487	0.0123015	0.170418
						GABRP	-1.1845	0.000280618	0.0234855
						NUDT14	-1.18445	0.0110706	0.163118
						NEXMIF	-1.184	0.0265289	0.238417
						IRS1	-1.18118	0.0107739	0.16183
						ENGASE	-1.18099	0.00633087	0.122742
						DHRS4-AS1	-1.17765	0.000996399	0.0478313
						CLDN4	-1.17737	0.00704474	0.129805
						THOC3	-1.1771	0.0035851	0.0935385
						PLA2G12A	-1.17691	0.00366799	0.0945798
						FYB2	-1.17677	0.00302036	0.087637
						PLEKHS1	-1.17666	0.00166515	0.0632003
						MPHOSPH9	-1.17642	0.00138489	0.0574947
						CCNB2	-1.17632	0.00801328	0.139199
						PPP1R9A	-1.17577	0.00503922	0.110765
						CDHR4	-1.17474	0.0230846	0.225428
						CFAP74	-1.1741	0.0110552	0.163073
						BRIP1	-1.17383	0.00156226	0.0613836
						LINC00987	-1.17342	0.00111868	0.0506288
						ZBTB4	-1.17315	0.000131951	0.0146388
						ADCY6	-1.17242	0.0109017	0.16183
						NSMCE4A	-1.17237	0.00318925	0.088828
						SH3GLB2	-1.17224	0.00169801	0.0642325
						RHCG	-1.17184	0.0267261	0.239513
						TPBG	-1.17091	0.0168128	0.196943
						SRPX2	-1.16821	0.0223915	0.221734
						CRACR2A	-1.1681	0.00141719	0.0582859
						HSPB11	-1.16434	0.000893678	0.0453782
						MORN5	-1.16236	0.00539847	0.114399
						ALG14	-1.16172	0.0299807	0.253548
						KNDC1	-1.16148	0.0303333	0.254459
						MRPL1	-1.15955	0.00261592	0.081069
						HIST1H2BE	-1.15936	0.0290821	0.250149
						PLPP2	-1.15873	0.0169411	0.197577
						PPP2R3B	-1.15621	0.00822677	0.141419
						EVC2	-1.15542	0.0249506	0.232964
						TRAF4	-1.15251	0.00420055	0.100443
						ITGB4	-1.15155	0.00378503	0.096096
						HOMER2	-1.15107	0.0147634	0.185104
						EFCAB12	-1.14823	0.00624724	0.122732
						CAVIN2	-1.14643	0.00639528	0.123077
						ZNF320	-1.14467	0.00242209	0.0778015
						MRPL12	-1.14464	0.00729054	0.132393
						LINC00673	-1.14396	0.0221603	0.221202
						MORN3	-1.14367	0.0178485	0.20261
						TMEM160	-1.14321	0.0143175	0.182275
						CFAP57	-1.14299	0.0142787	0.182221
						STK11	-1.1417	0.00161599	0.0619813
						EPHA2	-1.14167	0.00910306	0.149443
						SOBP	-1.14146	0.0108976	0.16183
						TCEA3	-1.14085	0.0112178	0.16428
						CRISP3	-1.1397	0.00132633	0.0565109
						KATNB1	-1.13867	0.00369786	0.0948967
						HABP4	-1.13773	0.0067986	0.127674
						SEMA3F	-1.13605	0.0166648	0.196204
						RIMS1	-1.1356	0.00637215	0.12299
						SCOC	-1.13443	0.000313092	0.0252039
						C17orf80	-1.13439	0.000146781	0.0155025
						UBE3D	-1.13435	0.0296483	0.252643
						ELP1	-1.13387	0.000630321	0.0379977
						ALS2CL	-1.13329	0.0282292	0.246809
						AKAP7	-1.13113	0.00634602	0.122742
						CDCA7L	-1.13005	0.00219168	0.0728829
						HACL1	-1.12985	0.00815125	0.14067
						MAD1L1	-1.12975	0.00361518	0.0936942
						AKAP12	-1.12867	0.000497511	0.0329086
						PPP1R16A	-1.12865	0.00427316	0.101101
						LINC00342	-1.12836	0.00134584	0.0571309
						BMI1	-1.12789	4.05e-05	0.00763183
						SPRR3	-1.12692	0.0132519	0.17732
						NET1	-1.12398	0.000281072	0.0234855
						FAM83H-AS1	-1.12362	0.0290585	0.250149
						SYNGAP1	-1.12315	0.00981555	0.155006
						ERBB4	-1.12274	0.00845239	0.143799
						PARD6B	-1.122	0.00343337	0.0926356
						CROCC	-1.12168	0.00906689	0.149337
						ERICH3	-1.12009	0.00149185	0.0600471
						KIF1C	-1.1198	0.00012828	0.0145995
						PAX9	-1.11946	0.000374882	0.0281204
						TMEM231	-1.11783	0.00320986	0.0890265
						ITPR3	-1.11608	0.00362442	0.0936942
						FAM3D	-1.11601	0.00596018	0.11935
						MMP8	-1.11593	0.0054432	0.114611
						GOLGA8N	-1.11584	0.00790511	0.13823
						CEACAM8	-1.11572	0.00482498	0.107762
						C5orf63	-1.11554	0.0304543	0.254794
						HMGN2	-1.11478	2.82e-05	0.00582364
						ITGB3BP	-1.11428	0.00423552	0.100934
						DSEL	-1.11353	0.028258	0.246897
						RABL6	-1.11142	0.000133995	0.0147417
						GCSHP5	-1.10836	0.0129706	0.175389
						ARMC10	-1.108	0.000393772	0.0284076
						IL5RA	-1.10783	0.0037368	0.095607
						NME4	-1.10733	0.00724512	0.131931
						DMD	-1.10628	0.00105312	0.0493025
						GOLPH3L	-1.1055	0.000288531	0.0239571
						C2orf74	-1.10429	0.00632966	0.122742
						SCEL	-1.10421	0.0177696	0.202316
						DNAH9	-1.10317	0.00376336	0.095923
						FAM83A	-1.10202	0.02952	0.252248
						NDUFB1	-1.10197	5.53e-05	0.0089091
						UCK2	-1.10086	0.0134508	0.178454
						ZNF214	-1.09999	0.0166098	0.196047
						TSPAN6	-1.09957	0.00232962	0.0759399
						ZNF69	-1.09906	0.0247398	0.23252
						KRT6B	-1.09672	0.0111752	0.164111
						DNAH11	-1.09243	0.00262955	0.0813004
						DRC7	-1.09211	0.00286285	0.0845533
						IGSF10	-1.09117	0.0244054	0.2313
						BEX3	-1.09106	0.0109341	0.16183
						RND3	-1.09096	0.00193084	0.068411
						LOC100506123	-1.09039	0.00675417	0.127201
						FAM86DP	-1.09016	0.0113307	0.164384
						RNU5E-1	-1.08935	0.00757129	0.135076
						TOGARAM2	-1.08749	0.0136628	0.179122
						FZD6	-1.08562	0.00950812	0.152894
						C14orf28	-1.0853	0.0284033	0.247228
						PRMT6	-1.08509	0.0261538	0.237145
						MRPL48	-1.08353	0.00522277	0.113034
						CRIP2	-1.0835	0.0237159	0.228366
						DNAH5	-1.08181	0.00284949	0.0845533
						FAM129B	-1.08097	0.000198897	0.0194507
						ISCA2	-1.08051	0.00289517	0.0851269
						TMEM182	-1.07821	0.0256116	0.23458
						CHD6	-1.07774	4.96e-06	0.00181395
						CAPSL	-1.07653	0.00665909	0.126676
						ZNF346	-1.07514	0.00744698	0.133944
						CYB561	-1.0748	0.00466045	0.105899
						GSDMB	-1.07453	0.0295819	0.252461
						RSRC1	-1.07415	0.000723188	0.0409765
						PRSS8	-1.07286	0.0186038	0.205353
						HCG11	-1.07282	0.00537775	0.114327
						PJA1	-1.07162	0.00515381	0.112093
						NCAPG2	-1.07145	0.0156925	0.191088
						BEND7	-1.07124	0.0122598	0.170418
						CDC42BPG	-1.07103	0.000541793	0.0348915
						POLR2D	-1.0709	0.000116044	0.0134387
						MID2	-1.06926	0.00166594	0.0632003
						ROGDI	-1.06866	0.0042073	0.100443
						TRIR	-1.06769	0.000999957	0.0478313
						CXCL6	-1.06697	0.00489141	0.108342
						DHRS13	-1.06534	0.00406607	0.100443
						HIBADH	-1.06511	0.0021281	0.072039
						ST7	-1.06466	0.00527262	0.11374
						HIST2H4B	-1.06271	0.00725523	0.131933
						THRB	-1.06246	0.00586749	0.11917
						ZNF263	-1.06087	0.00112364	0.0506288
						ZNF286A	-1.05967	0.011405	0.164736
						KIF22	-1.05948	0.0240898	0.230125
						LMF1	-1.05872	0.0296023	0.252461
						KRT19	-1.05538	0.0012205	0.0531783
						ZNHIT6	-1.05489	0.0026982	0.0822671
						STARD9	-1.05234	0.0204087	0.213498
						CRELD2	-1.05227	0.0117777	0.167193
						RSPO1	-1.05137	0.00953272	0.153018
						PAAF1	-1.05068	0.0225861	0.222856
						ELAC1	-1.05057	0.0260973	0.23699
						FREM2	-1.0493	0.0197944	0.209228
						VLDLR	-1.0492	0.0262478	0.237671
						SRGAP3	-1.04898	0.00603167	0.119844
						CHL1	-1.04882	0.00193503	0.068411
						MRPS25	-1.04869	0.0163527	0.194757
						C11orf1	-1.04835	0.0129472	0.175389
						NKX3-1	-1.0479	0.00976741	0.15443
						ECSIT	-1.04765	0.0122709	0.170418
						LMAN2L	-1.04738	0.0279586	0.245898
						CCDC40	-1.04697	0.0132101	0.177235
						SCNN1G	-1.04658	0.0286725	0.248418
						TACSTD2	-1.04645	0.000884004	0.0450603
						RMND5B	-1.04615	0.00255999	0.080278
						TRMT1	-1.04507	0.0102368	0.157541
						ARHGAP11A	-1.04437	0.00567987	0.117615
						SOX13	-1.04202	0.0192969	0.207611
						SDR16C5	-1.04116	0.014965	0.18656
						UCKL1-AS1	-1.04106	0.016401	0.194757
						SLC22A5	-1.03961	0.0111088	0.163317
						SAXO2	-1.03934	0.005133	0.111901
						MMP25-AS1	-1.03677	0.00552358	0.115566
						MCM5	-1.03676	0.022972	0.225204
						ELF3	-1.03609	0.000223393	0.0208664
						LOC100506990	-1.03559	0.0151797	0.187643
						DIP2C	-1.03462	0.0279347	0.245862
						ABCA6	-1.03411	0.0283105	0.24692
						EXOSC7	-1.03332	0.0105045	0.15922
						GPAA1	-1.02989	0.00283305	0.0844948
						CCDC17	-1.02873	0.00605752	0.120046
						GSTP1	-1.02842	0.000874383	0.0447427
						BMS1P1	-1.02825	0.00107428	0.049436
						FCGBP	-1.02785	0.0134985	0.178454
						NHLRC3	-1.02783	0.00946419	0.152744
						MED10	-1.02556	0.00420051	0.100443
						PPP1R13L	-1.02472	0.020458	0.213676
						WARS2	-1.0241	0.0120391	0.169145
						ZDBF2	-1.02366	0.00585236	0.11917
						CUBN	-1.02216	0.0309472	0.257121
						DOCK9	-1.02123	0.000223397	0.0208664
						ASPRV1	-1.02119	0.0268789	0.240212
						KRT10	-1.01897	0.0041177	0.100443
						TMEM159	-1.01836	0.00361048	0.0936942
						KEAP1	-1.01807	0.001371	0.0574947
						LGR4	-1.01777	0.0177685	0.202316
						CA5BP1	-1.01541	0.0171566	0.198338
						ZNF304	-1.01352	0.0258935	0.236081
						CKAP2L	-1.0121	0.0169908	0.197982
						FBXO5	-1.01125	0.0264509	0.238314
						CADPS2	-1.01042	0.010813	0.16183
						GAS8	-1.00957	0.00338904	0.0923653
						THAP2	-1.00928	0.0044132	0.102752
						HILPDA	-1.00818	0.0126632	0.173784
						RASSF8	-1.00777	0.00799719	0.139128
						GPSM2	-1.00757	0.0047715	0.107681
						CEACAM5	-1.00727	0.0018278	0.0664756
						OCEL1	-1.00666	0.0177462	0.202316
						MEIS2	-1.00652	0.016373	0.194757
						ZNF439	-1.00605	0.0236774	0.228333
						PAWR	-1.00545	0.00104928	0.0493025
						SMIM31	-1.00544	0.0276506	0.244387
						MZT2B	-1.004	0.0104091	0.158502
						ZNF70	-1.00361	0.0234174	0.226894
						ZBTB8A	-1.0031	0.00369451	0.0948967
						SPACA9	-1.00278	0.0109337	0.16183
						BMPR1A	-1.00192	0.0306147	0.255703
						DNAAF1	-1.0006	0.00744542	0.133944
						RBM15B	-1.0004	0.000198819	0.0194507
						OLMALINC	-0.999499	0.0316655	0.259697
						FAM83B	-0.998481	0.0130233	0.175389
						CAMSAP2	-0.997957	0.000246892	0.0220234
						SIX4	-0.996892	0.00333609	0.0913755
						TRGC2	-0.996311	0.00687622	0.12822
						NUFIP1	-0.995076	0.0133168	0.177559
						FKBP9	-0.994613	0.0129046	0.175389
						SNORD3A	-0.994121	0.011394	0.164736
						NWD1	-0.99408	0.010267	0.15761
						COL4A5	-0.991414	0.0303377	0.254459
						NHS	-0.990922	0.00147442	0.0598933
						APEH	-0.990352	0.00252841	0.0800997
						DNAH6	-0.989606	0.00599383	0.119533
						MRPS24	-0.989156	0.00594147	0.119209
						ISG20L2	-0.988144	0.00549253	0.115282
						DSP	-0.987926	0.00071841	0.0409765
						CHST9	-0.986917	0.00404547	0.100443
						HIST1H2AI	-0.986901	0.0269843	0.240789
						HOPX	-0.986888	0.0270421	0.240856
						USP5	-0.986776	0.0161535	0.193842
						ZNF626	-0.986558	0.0068693	0.12822
						ZNF605	-0.986073	0.0175772	0.201267
						MEN1	-0.985341	0.0303232	0.254459
						ACP6	-0.984858	0.00968868	0.153738
						LRIG3	-0.984575	0.00990218	0.155538
						PARL	-0.984403	0.00891732	0.148363
						DCTN5	-0.983836	0.00771062	0.136273
						MDH1B	-0.983374	0.0315303	0.259474
						DNAH3	-0.983102	0.00807222	0.139672
						KRT23	-0.983019	0.000683533	0.0398328
						TMEM30B	-0.980819	0.025992	0.236431
						SNRPB2	-0.980314	0.00192677	0.068411
						NUP43	-0.980288	0.00628168	0.122742
						KRT13	-0.980182	0.0218505	0.219566
						S100A14	-0.979009	0.00416406	0.100443
						GRHL2	-0.978057	0.00712227	0.130233
						SPAG17	-0.977702	0.00532067	0.114032
						NUP37	-0.977654	0.0118096	0.167244
						POP5	-0.977177	0.0173514	0.199537
						LDLRAD1	-0.97543	0.0123173	0.170418
						CPSF4	-0.973972	0.0158741	0.191914
						ALDH7A1	-0.972894	0.026711	0.239513
						GLRX3	-0.972759	0.00345718	0.0926356
						MECOM	-0.972114	0.00356213	0.0935385
						EPPK1	-0.971906	0.0243355	0.230969
						METTL15	-0.971695	0.00710428	0.130084
						ZBED1	-0.971631	0.00275096	0.0827293
						EHHADH	-0.970939	0.0287028	0.248418
						MRPS34	-0.970916	0.00176217	0.0653488
						ULK3	-0.970608	0.0152534	0.188005
						SPINT1	-0.970589	0.0183777	0.204048
						ALDH18A1	-0.96897	0.0168079	0.196943
						TPPP3	-0.967632	0.0053044	0.113868
						ESRP2	-0.967462	0.00354297	0.0935385
						DZIP1	-0.965035	0.0148018	0.185401
						RHOT2	-0.964297	0.00419959	0.100443
						MLF1	-0.964141	0.016687	0.196204
						PLAT	-0.964049	0.0313755	0.258887
						ZNF543	-0.962584	0.0292922	0.251441
						FAM228B	-0.962546	0.00278717	0.0836277
						POLR1A	-0.961421	0.011453	0.165068
						GIPC1	-0.961277	0.0171259	0.198338
						DUSP5	-0.961113	0.00434832	0.101785
						TSPAN13	-0.961043	0.00537345	0.114327
						ANKRD36C	-0.960383	0.00161281	0.0619813
						ST6GALNAC4	-0.959922	0.0290849	0.250149
						AHDC1	-0.956819	0.013093	0.176022
						ZNF585B	-0.956698	0.00708208	0.129858
						UCKL1	-0.956623	0.00461005	0.105294
						HLCS	-0.956504	0.00429975	0.101548
						ENAH	-0.955685	0.00426142	0.101004
						H2AFX	-0.954418	0.00615777	0.121371
						PTPRT	-0.954058	0.0227178	0.223799
						PLAC4	-0.954008	0.0175848	0.201267
						PTPN13	-0.953141	0.00481455	0.107732
						TFCP2	-0.952417	0.000661823	0.0391107
						TOM1L1	-0.951499	0.0317536	0.259697
						AHCY	-0.950802	0.00568389	0.117615
						ACYP1	-0.950713	0.0261188	0.23699
						ZSCAN32	-0.950362	0.0068505	0.12822
						FBN1	-0.949644	0.0197154	0.20902
						NIPAL2	-0.948994	0.0197327	0.20902
						YEATS4	-0.948691	0.00906768	0.149337
						NOL11	-0.948484	0.00357874	0.0935385
						ZNF675	-0.948128	0.00146728	0.0597871
						AQP3	-0.948028	0.0038666	0.0975894
						SAP30L	-0.947374	0.000400995	0.0287714
						ATG4A	-0.947155	0.0127292	0.174508
						NOM1	-0.946414	0.0197767	0.209208
						SLC35A4	-0.946092	0.00178086	0.0658567
						PHF23	-0.945638	0.00154005	0.0612402
						PTPRF	-0.945522	0.00922964	0.150804
						GNA11	-0.944735	0.0183924	0.204048
						TMA7	-0.944702	0.000386872	0.0284076
						PYGO2	-0.944668	0.00970818	0.153862
						C12orf75	-0.94422	0.0112365	0.16428
						LSM7	-0.943905	0.0226164	0.222988
						TMEM263	-0.943829	0.00283527	0.0844948
						RSPH10B	-0.943485	0.00948644	0.152744
						CCDC34	-0.942548	0.0118758	0.167505
						PROM1	-0.942117	0.00879245	0.147307
						FAT2	-0.94178	0.0129637	0.175389
						USP40	-0.939278	0.01907	0.207041
						ZCCHC4	-0.93895	0.0113202	0.164384
						GATM	-0.93853	0.021855	0.219566
						MYO9A	-0.93825	0.000955945	0.0469159
						XRCC1	-0.937218	0.00648862	0.124149
						PPME1	-0.937124	0.00272148	0.0824464
						ATRIP	-0.936362	0.0191253	0.207045
						ADGRF1	-0.934318	0.0120832	0.169145
						ZNF616	-0.933826	0.00884289	0.147777
						DNAH12	-0.933541	0.00626446	0.122742
						PPP1R14B	-0.933486	0.00963346	0.153474
						TCF3	-0.932076	0.0176234	0.201267
						ZFP64	-0.931964	0.0254756	0.234309
						CCDC149	-0.931671	0.00695632	0.128828
						ABCA13	-0.930655	0.00253004	0.0800997
						SMPD2	-0.928442	0.0116421	0.166547
						WFDC21P	-0.927421	0.0113461	0.164384
						ZBBX	-0.926106	0.00415594	0.100443
						KRT4	-0.925136	0.0263122	0.237959
						CPEB3	-0.924744	0.000908019	0.0457119
						FIBP	-0.92406	0.00664615	0.126613
						ELMOD3	-0.923656	0.0239487	0.229608
						PLEKHO1	-0.922758	0.00295718	0.0863731
						GTF2IRD2	-0.919001	0.0017093	0.0644749
						TGM2	-0.918134	0.00312919	0.0881355
						RIPK4	-0.918102	0.0291789	0.250794
						ZNF528	-0.916191	0.025504	0.234309
						KIZ	-0.916049	0.0145918	0.18383
						PIGP	-0.915031	0.0253163	0.234229
						KIF21A	-0.914102	0.00306878	0.0879472
						MAGI3	-0.913744	0.00543613	0.114611
						STK39	-0.913189	0.00112154	0.0506288
						ATN1	-0.913118	0.0145928	0.18383
						SNORA73B	-0.912187	0.0222006	0.221202
						PUS7	-0.911975	0.00584194	0.11917
						NACC1	-0.911668	0.00582942	0.11917
						PPIC	-0.911362	0.0266201	0.239074
						IGF2BP3	-0.911245	0.0186193	0.205353
						USP11	-0.911052	0.00667721	0.1267
						YAP1	-0.908944	0.013747	0.179513
						CHN2	-0.908791	0.0146945	0.184758
						MTERF3	-0.90866	0.0137737	0.179684
						TAF6	-0.907479	0.0161951	0.193842
						MAGED2	-0.907277	0.0100299	0.156274
						NELFB	-0.906312	0.0100069	0.156274
						MPZL2	-0.906013	0.00307013	0.0879472
						RAI14	-0.905156	0.00822544	0.141419
						SRPRB	-0.904587	0.0178451	0.20261
						CA5B	-0.90438	0.0145862	0.18383
						ANKRD42	-0.902921	0.011707	0.166906
						BRMS1L	-0.902539	0.0230794	0.225428
						GOLGA8A	-0.902366	0.0263698	0.237959
						PDP2	-0.901875	0.0258653	0.235987
						UBE2M	-0.900561	0.0059666	0.11935
						DCLRE1A	-0.898798	0.015266	0.188005
						POLR3D	-0.897011	0.0164026	0.194757
						BCR	-0.896285	0.00400836	0.099846
						ILF2	-0.896222	0.0011489	0.0513143
						RANBP17	-0.895939	0.0139995	0.181695
						FRK	-0.895668	0.0189402	0.206677
						IFI27	-0.895561	0.0118455	0.167434
						UBA5	-0.89554	0.00260384	0.0808845
						MDH2	-0.895337	0.000359555	0.0271248
						GTF2IRD2P1	-0.89524	0.0120733	0.169145
						EXOSC6	-0.894538	0.0249869	0.232964
						ANKRD6	-0.893833	0.0145477	0.18383
						RSPH10B2	-0.893681	0.012222	0.170418
						POLR2H	-0.89345	0.0136266	0.178825
						ST6GAL1	-0.89279	0.00217855	0.0726292
						CFAP70	-0.891753	0.0246362	0.232394
						PHKG2	-0.891211	0.0174364	0.199996
						DCTN3	-0.890894	0.00805857	0.139618
						TMUB1	-0.890554	0.0154118	0.189272
						WDR12	-0.89045	0.0250165	0.233075
						CAMLG	-0.890233	0.000719501	0.0409765
						SART1	-0.889231	0.00135582	0.0571871
						CFAP45	-0.888777	0.00317793	0.0887
						B9D2	-0.887513	0.0154548	0.189403
						E4F1	-0.887207	0.0179008	0.202686
						PITX1	-0.886582	0.017961	0.202686
						KDM1A	-0.886349	0.00117267	0.0516052
						CSPP1	-0.885383	0.000942237	0.0464157
						VPS25	-0.885367	0.00119895	0.0525352
						RPL18	-0.884873	0.0013235	0.0565109
						NBEA	-0.883901	0.00668938	0.1267
						CBY1	-0.883459	0.0244945	0.231479
						ZNF41	-0.88178	0.0273139	0.2425
						SPEF2	-0.881291	0.0249496	0.232964
						EXOSC9	-0.879898	0.0185734	0.205353
						DNALI1	-0.879667	0.00890926	0.148363
						ABCC4	-0.87859	0.031404	0.25896
						APBB2	-0.877011	0.0132567	0.17732
						PMM1	-0.876611	0.0215287	0.218425
						C7orf50	-0.875657	0.0182058	0.203689
						NAT1	-0.875336	0.00591759	0.119209
						SPATA2L	-0.875316	0.0317951	0.259697
						GATD3A	-0.875194	0.0107519	0.16183
						MAGEF1	-0.873865	0.031789	0.259697
						APOBR	-0.873267	0.00125853	0.0544239
						LRRC37A4P	-0.871604	0.00520144	0.112758
						ZFYVE9	-0.871559	0.0171292	0.198338
						SH2B1	-0.871089	0.0212828	0.21781
						CCDC13	-0.870966	0.0251636	0.233607
						ALKBH5	-0.869553	0.000663596	0.0391107
						SH3PXD2A	-0.868664	0.0156634	0.191088
						ZNF440	-0.867693	0.0128841	0.175389
						SOWAHC	-0.866185	0.0233735	0.226873
						RSPH9	-0.866179	0.0260034	0.236431
						CMYA5	-0.866003	0.0275611	0.243875
						SSRP1	-0.865503	0.00264919	0.0813364
						RBBP7	-0.86476	0.00161506	0.0619813
						TIMM50	-0.864756	0.0243923	0.2313
						PMS2P9	-0.863742	0.00102184	0.0483526
						SMARCAL1	-0.863734	0.00629131	0.122742
						KAZN	-0.863376	0.00227111	0.0744001
						INTS7	-0.862753	0.0225803	0.222856
						RDH10	-0.862167	0.00442849	0.102752
						PTMAP9	-0.861857	0.00513651	0.111901
						PROK2	-0.861202	0.00927625	0.151162
						IFT122	-0.860884	0.0132335	0.17732
						WDR89	-0.860299	0.0223926	0.221734
						LRRC46	-0.858353	0.0272608	0.242192
						ITGA2	-0.858226	0.00768122	0.135998
						UQCRHL	-0.858133	0.00646328	0.124024
						ANKRD36	-0.858065	0.0015344	0.0611999
						NDUFB8	-0.858038	0.002723	0.0824464
						PPA1	-0.856445	0.00158453	0.0615265
						PCNT	-0.855802	0.00644102	0.123776
						C19orf24	-0.854874	0.0311597	0.258028
						CSRP1	-0.854376	0.00383184	0.0970979
						FOXJ1	-0.854199	0.029418	0.25189
						SLC7A2	-0.853799	0.0299054	0.253548
						LANCL1	-0.852959	0.0073258	0.132609
						PLCB4	-0.852309	0.0152125	0.187872
						TMPRSS2	-0.852104	0.0287143	0.248418
						SNRPGP15	-0.851808	0.00190294	0.0680831
						KCNK1	-0.847524	0.0310043	0.257433
						HYDIN	-0.845867	0.0197431	0.20902
						PEX2	-0.845007	0.00267751	0.0818252
						DRC1	-0.844836	0.0186143	0.205353
						SIX1	-0.844559	0.0213754	0.21811
						THAP4	-0.84388	0.0183711	0.204048
						TMTC2	-0.843224	0.0117206	0.166921
						KMT2B	-0.842768	0.00542048	0.114611
						DEF8	-0.842167	0.0102617	0.15761
						NDUFB2	-0.841574	0.00107844	0.049436
						MSANTD3	-0.841306	0.0062766	0.122742
						GEMIN7	-0.839897	0.0306932	0.255897
						TCEAL3	-0.839263	0.0263576	0.237959
						FAIM	-0.839199	0.00776151	0.136644
						CCDC30	-0.838375	0.0203741	0.213306
						MYO1D	-0.838038	0.00924864	0.150928
						WWTR1	-0.837988	0.0177766	0.202316
						DNAJC19	-0.837776	0.00590344	0.11917
						MRTFB	-0.837728	0.00412836	0.100443
						KIFC3	-0.836065	0.00749339	0.13423
						EMG1	-0.832479	0.0133017	0.177559
						MAL2	-0.832194	0.0210871	0.216888
						IPO5	-0.831081	0.000785834	0.043048
						CISD3	-0.830557	0.0218701	0.219566
						HIP1R	-0.829244	0.0170748	0.198324
						FBL	-0.828054	0.0220789	0.220903
						DNAH7	-0.827992	0.0232346	0.226045
						GADD45GIP1	-0.827843	0.016452	0.194757
						TRMT10C	-0.82763	0.00227047	0.0744001
						MPRIP	-0.82447	0.00661672	0.126234
						TNFRSF21	-0.823764	0.00448834	0.103807
						LRIG1	-0.823439	0.0311932	0.258028
						SERPINF1	-0.822827	0.021502	0.218425
						ST5	-0.821471	0.0163952	0.194757
						LAMTOR2	-0.821201	0.0098274	0.155008
						WDR66	-0.82068	0.0163105	0.194757
						PSMG1	-0.820583	0.022336	0.221734
						TULP3	-0.820331	0.0181467	0.203373
						INSR	-0.819927	0.0117696	0.167193
						AK4	-0.819803	0.0280653	0.245898
						UMPS	-0.819028	0.0170709	0.198324
						CDHR3	-0.819024	0.0193584	0.207611
						BLOC1S2	-0.819018	0.00199881	0.0698103
						SCRIB	-0.818169	0.0247456	0.23252
						NDFIP2	-0.817671	0.0200296	0.211316
						SERPINB3	-0.81692	0.0192531	0.207611
						PEX11B	-0.81568	0.0194808	0.20832
						SRSF9	-0.813962	0.000243707	0.0220234
						SOX2	-0.813264	0.0304625	0.254794
						MXD3	-0.813056	0.0186631	0.205353
						ERBB3	-0.812597	0.0250773	0.233148
						HMG20A	-0.810666	0.0202936	0.212801
						HEY1	-0.810433	0.0157267	0.191088
						MLEC	-0.809839	0.0120543	0.169145
						LCA5	-0.80906	0.0215074	0.218425
						ARHGEF5	-0.808557	0.00884131	0.147777
						MYB	-0.808557	0.00633966	0.122742
						TSSC4	-0.808439	0.0242338	0.230833
						RINT1	-0.80806	0.0187034	0.205597
						TIPRL	-0.807809	0.00101607	0.0482807
						TXNDC17	-0.807655	0.0100219	0.156274
						RILPL1	-0.807114	0.0130018	0.175389
						ARHGAP32	-0.806022	0.0059027	0.11917
						BMS1P20	-0.805243	0.0019432	0.068411
						SFXN1	-0.804741	0.0252431	0.23403
						EFCAB6	-0.804567	0.0254907	0.234309
						SGO1	-0.80358	0.0239747	0.229691
						IQCE	-0.803569	0.00606504	0.120046
						POLE3	-0.803461	0.0122595	0.170418
						EIF2B5	-0.803383	0.00695352	0.128828
						ACYP2	-0.802754	0.0302729	0.254459
						URB1	-0.801917	0.028826	0.249058
						SCARNA10	-0.800509	0.0290671	0.250149
						GRSF1	-0.800116	0.000773279	0.0427147
						TBCC	-0.799548	0.0209683	0.21676
						ANKRD11	-0.799142	1.73e-05	0.00401186
						TFDP2	-0.797437	0.00593449	0.119209
						TUFM	-0.796378	0.00256933	0.08038
						GPX2	-0.79463	0.0298038	0.253198
						SPA17	-0.793127	0.0194086	0.207813
						NOP14-AS1	-0.79231	0.0307078	0.255897
						NMRAL1	-0.792174	0.0244727	0.231479
						PPP1R12B	-0.791361	0.0168783	0.197367
						COG4	-0.790935	0.0193358	0.207611
						CNPY3	-0.790864	0.00161972	0.0619813
						TBCA	-0.790129	0.00272906	0.0824464
						JHY	-0.789254	0.0141735	0.181736
						CEP250	-0.789224	0.00958039	0.153307
						PLIN5	-0.789114	0.0296619	0.252643
						GTF2IRD2B	-0.788939	0.00817424	0.140883
						ZNF462	-0.788506	0.0273675	0.24265
						MAP4K2	-0.787109	0.00965403	0.153474
						HDDC2	-0.786607	0.0182001	0.203689
						NGRN	-0.786399	0.00583502	0.11917
						KIAA1671	-0.785628	0.0108993	0.16183
						ERGIC3	-0.784418	0.0113191	0.164384
						NAPG	-0.784053	0.00485336	0.107869
						DNAH1	-0.783755	0.0227329	0.223799
						ARL14EP	-0.782975	0.0169217	0.197524
						LMO7	-0.782826	0.00504241	0.110765
						NUP155	-0.78154	0.0150307	0.187027
						CASTOR2	-0.780544	0.00483682	0.107762
						SRRT	-0.779709	0.000521303	0.0340803
						FAM133B	-0.777583	0.00285126	0.0845533
						FAM193A	-0.777154	0.00510314	0.111542
						BOLA2B	-0.776723	0.00698621	0.129176
						FTH1	-0.775321	0.00291701	0.0855702
						CFH	-0.774709	0.0223612	0.221734
						TRADD	-0.774199	0.010171	0.15705
						CFAP44	-0.772943	0.0207792	0.215497
						AP3D1	-0.772415	5.84e-05	0.0089091
						SNAPC3	-0.770432	0.0191331	0.207045
						TSHZ2	-0.769998	0.00943125	0.152658
						FAM13A	-0.769693	0.0095506	0.153018
						CDR2	-0.769454	0.0212338	0.217646
						TRIM29	-0.769316	0.0249456	0.232964
						G0S2	-0.768559	0.00750681	0.134289
						GTF2H5	-0.768556	0.0200451	0.211316
						RPL23AP87	-0.767009	0.024886	0.232964
						PNO1	-0.766306	0.0163516	0.194757
						ARL4C	-0.766039	0.0176139	0.201267
						EFCAB1	-0.764887	0.0275537	0.243875
						TMC5	-0.763629	0.0191033	0.207045
						ERC1	-0.762778	0.00418495	0.100443
						FAF1	-0.76219	0.00339321	0.0923653
						STX10	-0.760878	0.0263356	0.237959
						SNRPE	-0.760727	0.00705727	0.129805
						DUS1L	-0.760605	0.0311905	0.258028
						ELOB	-0.760431	0.000854868	0.0439143
						ARFGEF3	-0.760411	0.0243245	0.230969
						SYNE1	-0.76015	0.00189749	0.0680723
						LSM8	-0.759995	0.0195026	0.20832
						CLTB	-0.759944	0.00669872	0.1267
						ACADM	-0.759875	0.0051999	0.112758
						PDCL3	-0.759707	0.0105283	0.159398
						C22orf39	-0.757579	0.0157479	0.191088
						ZNF738	-0.756769	0.0134275	0.17834
						PALLD	-0.756402	0.0128336	0.1753
						ANP32C	-0.756126	0.013304	0.177559
						KCNMB3	-0.755817	0.0180651	0.202831
						PPP1R11	-0.755488	0.00453148	0.104224
						ZNF664	-0.755416	0.00731378	0.132609
						ALDH3B1	-0.755291	0.00608391	0.120239
						SGSM2	-0.754386	0.020056	0.211316
						PPP1CA	-0.751824	0.00396259	0.0991831
						CAMK2D	-0.751191	0.0189819	0.206677
						KRT18	-0.748365	0.0188182	0.206001
						HDGFL3	-0.747285	0.0142095	0.181866
						PA2G4	-0.746834	0.00431158	0.101645
						ZNF765	-0.746512	0.0316179	0.259697
						ALMS1	-0.745738	0.0091737	0.150076
						SCYL1	-0.74566	0.00550434	0.115346
						DIS3L	-0.743588	0.0246927	0.232396
						DNAJA4	-0.742072	0.00424928	0.101004
						GNL3	-0.741816	0.00913635	0.14965
						NUTF2	-0.741458	0.00451535	0.104034
						ZNF140	-0.740031	0.00799863	0.139128
						COX16	-0.738384	0.0205099	0.214049
						C15orf40	-0.73722	0.0277759	0.245118
						RMDN1	-0.736271	0.0161195	0.193639
						ZNF780B	-0.734241	0.0171779	0.19841
						NANS	-0.732422	0.00733259	0.132609
						PNRC2	-0.731964	0.000833141	0.0435229
						NDUFC1	-0.729782	0.00416753	0.100443
						UXT	-0.728628	0.0287337	0.248423
						SASH1	-0.728342	0.0316441	0.259697
						PRDX2	-0.726038	0.0312424	0.258111
						PPP2R3A	-0.72513	0.0278176	0.245323
						NUDT5	-0.721086	0.014717	0.184865
						CCP110	-0.721018	0.0104287	0.158547
						SLC35A3	-0.720813	0.0218035	0.219565
						ATP5PO	-0.719987	0.00306578	0.0879472
						MTR	-0.719749	0.023089	0.225428
						SH3D19	-0.718446	0.0153729	0.189145
						ZNF512	-0.718295	0.0298865	0.253548
						PMS2P2	-0.717502	0.0241636	0.230497
						WDR60	-0.717446	0.0237326	0.228366
						RRN3	-0.717076	0.0253491	0.234229
						SNHG6	-0.717073	0.00623688	0.122711
						ESRRA	-0.716901	0.0149972	0.186786
						ANP32E	-0.716784	0.00587423	0.11917
						UPF3A	-0.716075	0.0137208	0.179348
						ATAD2	-0.714395	0.0297649	0.253198
						TMEM59	-0.713479	0.000844488	0.0438934
						HMOX1	-0.713275	0.0246617	0.232394
						CRYBG3	-0.711137	0.00720646	0.13159
						NUMA1	-0.711058	0.00115051	0.0513143
						MYO5C	-0.710792	0.0179834	0.202747
						SOD1	-0.709663	0.0128337	0.1753
						RAB4A	-0.709553	0.0145363	0.18383
						LYRM1	-0.70642	0.00158374	0.0615265
						CPNE3	-0.706327	0.0035666	0.0935385
						TPI1	-0.705946	0.00313101	0.0881355
						FLOT2	-0.703489	0.000995144	0.0478313
						PI4KB	-0.702976	0.0209832	0.21676
						STARD10	-0.701721	0.0130205	0.175389
						MKRN2	-0.700571	0.0277714	0.245118
						MTPAP	-0.700409	0.0238364	0.229031
						CCT4	-0.699821	0.0113557	0.164384
						HDGF	-0.69757	0.000834063	0.0435229
						ARL1	-0.697031	0.0183859	0.204048
						NLK	-0.696368	0.0100113	0.156274
						SAT2	-0.695451	0.0290448	0.250149
						YKT6	-0.695285	0.00743052	0.133944
						CREBL2	-0.695123	0.00774234	0.136644
						APTX	-0.694158	0.0292082	0.250882
						SUPT6H	-0.693015	0.000806108	0.0434151
						WDR55	-0.692979	0.00377095	0.095923
						TRIM16	-0.692711	0.0302535	0.254459
						PGM2L1	-0.691736	0.0252906	0.234229
						STAT5A	-0.68963	0.0142994	0.182221
						TSPYL1	-0.689494	0.0151752	0.187643
						L3MBTL3	-0.689265	0.0123095	0.170418
						INPP4B	-0.688499	0.0310898	0.257819
						HNRNPA1P10	-0.686195	0.00632357	0.122742
						HIST1H1C	-0.685989	0.0110306	0.162893
						PLEKHG1	-0.684624	0.0238361	0.229031
						ECT2	-0.682077	0.0225034	0.222373
						MRPS10	-0.681075	0.00894799	0.148593
						PSMB5	-0.680159	0.0135375	0.178454
						HSPA1B	-0.679843	0.0116738	0.166794
						TRIM2	-0.676073	0.0280871	0.245898
						RFX7	-0.675874	0.00690824	0.128454
						HSPE1	-0.675194	0.00673337	0.127151
						FGFR1OP	-0.674958	0.0216572	0.218927
						COX6C	-0.67443	0.0222487	0.221514
						RPL6	-0.673118	0.019616	0.209016
						CSNK1E	-0.672591	0.00954405	0.153018
						NOP53	-0.670051	0.0154066	0.189272
						MBD1	-0.669987	0.0141081	0.181695
						ALDH3A2	-0.668961	0.016438	0.194757
						LRRC37A3	-0.667325	0.0103494	0.158416
						ANP32AP1	-0.665067	0.00841703	0.143568
						RPS19	-0.6646	0.0140355	0.181695
						ANAPC1P1	-0.663267	0.0192005	0.207435
						PGM1	-0.663041	0.0211399	0.216941
						INTS3	-0.661147	0.0208696	0.216264
						TLCD2	-0.661016	0.0173661	0.199537
						BRD9	-0.660102	0.0267416	0.239513
						EFHD2	-0.658566	0.000435301	0.0302465
						COA3	-0.657977	0.0303061	0.254459
						ZCRB1	-0.657544	0.0241198	0.230246
						TTC9	-0.656333	0.0278836	0.24574
						ZNF672	-0.653967	0.0233885	0.226873
						HERC2	-0.650857	0.0210941	0.216888
						MRPL34	-0.650809	0.0164633	0.194757
						SH3BP5	-0.65044	0.0253533	0.234229
						HOMER1	-0.649495	0.0122982	0.170418
						NCL	-0.648384	0.00107737	0.049436
						EXT1	-0.647833	0.0135296	0.178454
						MTMR12	-0.647749	0.0135662	0.178454
						CD82	-0.647514	0.011333	0.164384
						EID1	-0.64742	0.0183019	0.204048
						TPT1	-0.646291	0.00425418	0.101004
						HMGN1	-0.645921	0.00603666	0.119844
						ACIN1	-0.644669	0.00315431	0.0886027
						SREK1IP1	-0.644632	0.00690576	0.128454
						CIC	-0.644584	0.0299986	0.253548
						CCDC28A	-0.644119	0.0280837	0.245898
						RNF167	-0.643886	0.0109124	0.16183
						RPL18A	-0.64007	0.0232596	0.226121
						KMT2A	-0.638792	0.00984512	0.155102
						PMPCB	-0.638606	0.0176231	0.201267
						RPL10A	-0.638045	0.0245243	0.231595
						RPL3	-0.636639	0.0128525	0.1753
						MME	-0.635567	0.0294801	0.25207
						RPS3	-0.635418	0.0173297	0.199466
						ERRFI1	-0.635307	0.0154656	0.189403
						PTPN23	-0.634234	0.0315449	0.259474
						DESI2	-0.632782	0.00855552	0.144622
						SMARCD2	-0.632347	0.0138309	0.180253
						COX7C	-0.631751	0.0100379	0.156274
						SHLD2	-0.631117	0.0112857	0.164384
						COX7A2	-0.630961	0.00761483	0.135669
						TAF3	-0.629605	0.0141248	0.181695
						NELFE	-0.626182	0.01805	0.202831
						COX5B	-0.625264	0.0196905	0.20902
						LARP1B	-0.624085	0.0217323	0.219156
						EIF4E3	-0.62336	0.00442855	0.102752
						KPNA5	-0.622491	0.0135848	0.178454
						RPL27A	-0.619385	0.0105743	0.15991
						TARS	-0.619035	0.0267843	0.239733
						MNT	-0.618111	0.0231562	0.225781
						UPF3B	-0.617177	0.00898915	0.148902
						UBXN1	-0.613104	0.00148785	0.0600471
						STRBP	-0.612239	0.0192207	0.207483
						TM9SF2	-0.611577	0.0193117	0.207611
						MCPH1	-0.610378	0.0164212	0.194757
						RER1	-0.610104	0.0174296	0.199996
						JUND	-0.610017	0.000179512	0.0182301
						GOLM1	-0.60989	0.0300798	0.254071
						EIF2B4	-0.609675	0.0283271	0.24692
						VWA5A	-0.609302	0.0206229	0.214719
						RPL7	-0.609143	0.0255677	0.234569
						TJP2	-0.609042	0.0221963	0.221202
						ANAPC1	-0.608463	0.0280322	0.245898
						HAUS2	-0.607875	0.0294209	0.25189
						CDK11B	-0.607182	0.00999529	0.156274
						SMAD3	-0.607126	0.00902055	0.149194
						ANP32A	-0.605984	0.00144616	0.0592927
						FAM217B	-0.604975	0.0158188	0.191773
						FBXW11	-0.604145	0.00578986	0.119141
						SNRPG	-0.601695	0.0236431	0.228169
						FAM50A	-0.600266	0.0160613	0.193237
						RALGPS2	-0.599714	0.0215652	0.218425
						PARK7	-0.599105	0.0128361	0.1753
						PDXDC2P-NPIPB14P	-0.599002	0.0149516	0.18656
						MRPS16	-0.598345	0.0151772	0.187643
						KIAA0556	-0.597974	0.0318081	0.259697
						LIN54	-0.597	0.00474076	0.10717
						ZC3H18	-0.595606	0.00340892	0.092602
						VAMP8	-0.594708	0.0136969	0.179213
						PSMC4	-0.594284	0.0267236	0.239513
						RGS2	-0.592839	0.0287119	0.248418
						ANXA4	-0.592627	0.00565034	0.117289
						DDX50	-0.591623	0.00907195	0.149337
						SRP19	-0.587581	0.0249706	0.232964
						PPP2R5C	-0.586476	0.00027145	0.0232706
						NOSIP	-0.583776	0.0235506	0.227693
						BLZF1	-0.583165	0.0273563	0.24265
						TP53BP1	-0.58245	0.0112161	0.16428
						HSP90AB2P	-0.581745	0.0161884	0.193842
						PRELID1	-0.581224	0.00792981	0.138478
						ZNF609	-0.580495	0.0155654	0.190449
						UQCRQ	-0.580112	0.0298918	0.253548
						SRSF10	-0.57937	0.00370185	0.0948967
						BAZ1B	-0.579259	0.00855278	0.144622
						CD37	-0.579074	0.0268924	0.240212
						RAB6A	-0.578597	0.00331406	0.0909608
						REPS2	-0.578461	0.0157458	0.191088
						H3F3C	-0.578226	0.0101002	0.156642
						THAP6	-0.577743	0.0207538	0.215442
						ATP5ME	-0.576293	0.0253471	0.234229
						HSPB1	-0.574948	0.0231794	0.225841
						TCF25	-0.574781	0.00264725	0.0813364
						PIK3CA	-0.574565	0.00320806	0.0890265
						PSMB4	-0.573267	0.0084119	0.143568
						VPS36	-0.572406	0.0146228	0.184033
						UBTF	-0.57194	0.010799	0.16183
						USF2	-0.569452	0.0193565	0.207611
						SREBF2	-0.569158	0.0279776	0.245898
						DNAJC21	-0.567442	0.0210502	0.216888
						CHCHD2P6	-0.566445	0.0195033	0.20832
						RAB33B	-0.566337	0.0118051	0.167244
						GLTP	-0.565897	0.00359901	0.0936942
						MSH6	-0.56378	0.0264632	0.238314
						EGLN2	-0.562632	0.00635002	0.122742
						RNF24	-0.562065	0.0255114	0.234309
						PDXDC1	-0.561992	0.0188168	0.206001
						SLC4A1AP	-0.560869	0.0115682	0.166003
						NONO	-0.560138	0.0030797	0.0880047
						MTA2	-0.556919	0.0307221	0.255897
						PNRC1	-0.55657	0.0230673	0.225428
						GPS2	-0.556452	0.00215175	0.0722836
						OFD1	-0.552833	0.0256819	0.234638
						EDF1	-0.548454	0.0144193	0.1832
						CLEC2B	-0.548183	0.0141499	0.181719
						PIM3	-0.547188	0.0109098	0.16183
						POMP	-0.546428	0.0019198	0.068411
						FTH1P3	-0.545753	0.0255216	0.234309
						NOL10	-0.545425	0.0215514	0.218425
						KIAA1324	-0.5439	0.0302787	0.254459
						OSTF1	-0.540174	0.00598169	0.119471
						ANKRD20A9P	-0.538984	0.0124816	0.172186
						BAP1	-0.538778	0.0198927	0.210099
						TFAM	-0.537114	0.0285312	0.247646
						ATP6V1G1	-0.535632	0.00854139	0.144622
						CLINT1	-0.534787	0.0136945	0.179213
						PRKD3	-0.532757	0.0102219	0.157541
						GTF2IP4	-0.532599	0.00239126	0.0771868
						CLK3	-0.532243	0.0272024	0.241836
						RAB11A	-0.529895	0.010623	0.160097
						NRBF2	-0.527644	0.0191818	0.207402
						GAK	-0.525278	0.00943561	0.152658
						JTB	-0.521623	0.0209596	0.21676
						EIF2S1	-0.520882	0.0206112	0.214719
						PABPN1	-0.516061	0.0140959	0.181695
						PRRC2B	-0.515725	0.0264318	0.238314
						ALDH9A1	-0.514211	0.0302393	0.254459
						EEF1D	-0.513952	0.00811879	0.140294
						MFF	-0.512496	0.015067	0.187302
						ARHGAP21	-0.508867	0.0159075	0.191966
						KIF2A	-0.507583	0.0270557	0.240856
						BASP1	-0.497915	0.0312304	0.258111
						ATP8B5P	-0.496995	0.0299496	0.253548
						DAP	-0.49437	0.0158952	0.191966
						CGGBP1	-0.491351	0.00554739	0.115834
						SNX2	-0.488484	0.0140237	0.181695
						SYNE2	-0.488088	0.0304023	0.254794
						YWHAE	-0.486404	0.0256222	0.23458
						EIF3A	-0.485054	0.00196294	0.0689223
						GOLGA2	-0.483046	0.0129782	0.175389
						FAM120AOS	-0.482348	0.0239387	0.229608
						GTF2IP1	-0.481581	0.00405385	0.100443
						EIF5A	-0.4797	0.0115473	0.165883
						SRPK2	-0.473708	0.0179511	0.202686
						CCDC66	-0.467894	0.0211424	0.216941
						EMSY	-0.467428	0.0219978	0.22068
						GOLGA7	-0.46741	0.00945614	0.152744
						DYNC1LI2	-0.465216	0.0142951	0.182221
						UBA2	-0.461481	0.0120623	0.169145
						GFPT1	-0.452111	0.0303028	0.254459
						ALDOA	-0.447497	0.0116439	0.166547
						CHD3	-0.443551	0.0214234	0.218403
						C4orf3	-0.441201	0.0212826	0.21781
						H3F3B	-0.439822	0.0211486	0.216941
						RNASEK	-0.43684	0.0197119	0.20902
						MKNK2	-0.436587	0.0248726	0.232964
						CHMP3	-0.434348	0.0140869	0.181695
						COPS2	-0.429891	0.0242982	0.230946
						EIF4B	-0.427736	0.0300998	0.254077
						PABPC1	-0.426276	0.0217462	0.219156
						CHP1	-0.42289	0.00699984	0.129247
						SMAD4	-0.420805	0.0216762	0.218943
						SERF2	-0.419304	0.00975278	0.154384
						AHCYL1	-0.416198	0.0205571	0.214372
						IK	-0.40613	0.0188791	0.206497
						HSP90AA1	-0.404659	0.00850426	0.14431
						SRSF1	-0.401356	0.0317783	0.259697
						ADNP	-0.398285	0.0262228	0.237607
						HSPA8	-0.394373	0.0135762	0.178454
						RAB2A	-0.388297	0.0106129	0.160097
						MLF2	-0.384415	0.0307224	0.255897
						PTPN2	-0.374339	0.0227705	0.223839
						FAM192A	-0.373761	0.028285	0.24692
						THAP5	-0.368383	0.0100229	0.156274
						PTP4A1	-0.36565	0.0280272	0.245898
						VCP	-0.365401	0.0295939	0.252461
						LSM14A	-0.365088	0.0230575	0.225428
						SMARCA5	-0.35446	0.0221909	0.221202
						GPBP1	-0.353348	0.0279227	0.245862
						ETV6	-0.351348	0.025395	0.234309
						SARAF	-0.349972	0.0240887	0.230125
						RANBP9	-0.342335	0.0122472	0.170418
						OAZ1	-0.341466	0.026108	0.23699
						GCC2	-0.311333	0.00572519	0.118285
						STAU1	-0.310131	0.0168095	0.196943
						RAB22A	-0.305627	0.0215266	0.218425
						Up-regulated genes
						WAPL	0.291069	0.012405	0.171309
						COL4A3BP	0.300755	0.027656	0.244387
						FAM91A1	0.314192	0.021692	0.218943
						WDR82	0.321911	0.0151245	0.187603
						MTMR6	0.328035	0.0093165	0.151287
						GIT2	0.328792	0.0183638	0.204048
						EML4	0.333919	0.0283354	0.24692
						SPCS3	0.334797	0.0250651	0.233148
						AFTPH	0.335831	0.0126205	0.173558
						PDCD6IP	0.343565	0.0269935	0.240789
						IQGAP1	0.345965	0.0193984	0.207813
						B4GALT1	0.348796	0.0257347	0.234959
						DNAJC3	0.351977	0.03044	0.254794
						SRSF3	0.355118	0.0185153	0.205067
						TNPO1	0.355504	0.0108361	0.16183
						ATP6V1A	0.369791	0.0031249	0.0881355
						VIM	0.371483	0.0223398	0.221734
						LARP4B	0.377748	0.0254039	0.234309
						WASHC4	0.383698	0.0158601	0.191914
						PARP8	0.3888	0.0057937	0.119141
						NRIP1	0.391475	0.0233459	0.226794
						MARK3	0.391489	0.023425	0.226894
						RAB5B	0.405211	0.017941	0.202686
						RPS6KA3	0.407884	0.0145748	0.18383
						ARID4A	0.42905	0.010881	0.16183
						MFSD1	0.429071	0.0201304	0.211762
						MAP3K1	0.433443	0.00938947	0.152285
						TMEM33	0.434103	0.00548891	0.115282
						DIAPH2	0.445446	0.0186021	0.205353
						ADAM17	0.445848	0.0251797	0.233607
						CDC123	0.446267	0.0265189	0.238417
						GPCPD1	0.449729	0.0313492	0.258832
						APLP2	0.454896	0.0256142	0.23458
						SPTLC1	0.461702	0.0284507	0.247228
						STEAP4	0.462171	0.0120056	0.169145
						IRAK3	0.463445	0.0311333	0.258017
						CTSS	0.465923	0.00560946	0.116808
						PIAS1	0.4673	0.0117571	0.167193
						LAMP1	0.475961	0.0242132	0.230803
						STRN3	0.480434	0.0204508	0.213676
						AMPD3	0.487824	0.0186656	0.205353
						TRAPPC11	0.497578	0.0250572	0.233148
						PSMA3	0.505125	0.00890412	0.148363
						LAMTOR3	0.505133	0.014379	0.182882
						CTSB	0.521893	0.00539387	0.114399
						ATP2B1	0.523037	0.0256785	0.234638
						ELMSAN1	0.525413	0.00420681	0.100443
						UQCRC2	0.526841	0.00841268	0.143568
						GRN	0.532344	0.0156942	0.191088
						PSMA5	0.534306	0.030915	0.257121
						TPP1	0.535358	0.0180504	0.202831
						USP12	0.54059	0.0314884	0.259333
						PSAP	0.54525	0.00577141	0.119053
						MTMR14	0.545563	0.0281481	0.246263
						CCDC69	0.548272	0.0149627	0.18656
						GLUD1	0.549151	0.0290821	0.250149
						VCAN	0.553056	0.0249126	0.232964
						DRAM1	0.558591	0.0254713	0.234309
						FAM126A	0.559979	0.0246597	0.232394
						HIST1H1E	0.563868	0.0317666	0.259697
						CD58	0.568876	0.0158459	0.191914
						TIMP2	0.56957	0.0100732	0.156638
						RPN2	0.570543	0.0141206	0.181695
						SPRED2	0.575604	0.0287036	0.248418
						ITPR2	0.578541	0.0104067	0.158502
						FAR2	0.579486	0.0130193	0.175389
						EMILIN2	0.581554	0.029446	0.251941
						SWT1	0.583476	0.0209567	0.21676
						BCAT1	0.583506	0.0114411	0.165068
						DMXL2	0.584829	0.00344342	0.0926356
						UBTD2	0.586232	0.0210871	0.216888
						IRS2	0.587175	0.00555394	0.115834
						TFRC	0.588762	0.0317403	0.259697
						PLEKHM3	0.592325	0.0213667	0.21811
						ABCA1	0.594315	0.0166317	0.196047
						OXA1L	0.595514	0.0180676	0.202831
						ADCY7	0.600623	0.0297931	0.253198
						SIRT1	0.601639	0.0116987	0.166906
						TRAPPC1	0.601731	0.0213559	0.21811
						DSC2	0.607242	0.0293216	0.25153
						SYNJ2	0.608377	0.0180587	0.202831
						TPK1	0.612245	0.0220633	0.220903
						MPP5	0.614313	0.00804185	0.139512
						JAZF1	0.622088	0.0193553	0.207611
						TRDMT1	0.623019	0.0144479	0.183229
						HLA-DRA	0.62434	0.00768423	0.135998
						BICD2	0.628528	0.0215744	0.218425
						KCNJ2	0.628876	0.0259352	0.236286
						THAP1	0.630128	0.0173204	0.199466
						SLC11A2	0.632123	0.0168271	0.196943
						ZCCHC14	0.63311	0.0103648	0.158416
						PRR14	0.636357	0.0150982	0.187513
						MPEG1	0.637827	0.0207235	0.215426
						GM2A	0.639222	0.00528827	0.113868
						TMEM126B	0.640041	0.0186631	0.205353
						ATP6V1H	0.641466	0.00507605	0.111134
						LGALS1	0.655819	0.0109017	0.16183
						ATP11C	0.661144	0.00777935	0.136706
						SLC16A6	0.664407	0.0197241	0.20902
						RC3H2	0.666693	0.00184067	0.0667598
						ARHGAP31	0.671239	0.00861067	0.145368
						MARCKSL1	0.676814	0.0125301	0.172495
						POLD3	0.68727	0.0118193	0.167244
						CYBB	0.68814	0.0015027	0.0602997
						EZH1	0.700834	0.0106206	0.160097
						CSF2RA	0.702571	0.00749291	0.13423
						MS4A7	0.706722	0.0128534	0.1753
						PIAS2	0.713376	0.0160714	0.193237
						NDST1	0.719902	0.00959184	0.153307
						RNF144B	0.722296	0.00202612	0.0705775
						RAB29	0.724396	0.0202148	0.212471
						PLEKHJ1	0.725492	0.0187978	0.206001
						SLC22A15	0.728326	0.0166244	0.196047
						CCL2	0.734286	0.00892289	0.148363
						SLC31A2	0.736201	0.00964909	0.153474
						FRAT1	0.739396	0.025151	0.233607
						SUSD1	0.743312	0.0222752	0.221611
						FMNL3	0.74445	0.0107934	0.16183
						CCL18	0.746897	0.0189528	0.206677
						PTGER4	0.754088	0.0043758	0.102247
						GPNMB	0.755602	0.018431	0.204304
						TBC1D10C	0.756966	0.0284522	0.247228
						APOE	0.758977	0.0297734	0.253198
						VSIG4	0.763203	0.0299697	0.253548
						MTFR1	0.76648	0.0171493	0.198338
						SDC2	0.77041	0.0274093	0.242857
						SLC7A11	0.772532	0.0216007	0.218523
						KMO	0.777819	0.019658	0.20902
						SESN1	0.778588	0.0244849	0.231479
						RTL8C	0.78321	0.0235592	0.227693
						CYP1B1	0.791381	0.00341773	0.0926356
						RNF175	0.797665	0.0148983	0.186256
						GSAP	0.800928	0.000828519	0.0435229
						CERS5	0.804413	0.0172881	0.199334
						ZSCAN29	0.805459	0.0308073	0.256442
						PXK	0.806043	0.000934797	0.0463954
						GAB3	0.812604	0.0068158	0.127816
						ARSG	0.819541	0.0310565	0.257705
						LHFPL2	0.819607	0.00587991	0.11917
						PDE3B	0.820672	0.0115343	0.165878
						TMEM222	0.823141	0.0229105	0.224881
						CCL3L1	0.829357	0.023711	0.228366
						LINC02035	0.834638	0.0162195	0.193958
						LSS	0.839379	0.0236159	0.228074
						ARSB	0.845283	0.021033	0.216888
						LRP1	0.849803	0.00413076	0.100443
						SLC36A1	0.853959	0.00869356	0.146207
						CYC1	0.857655	0.00648374	0.124149
						NR1H3	0.867453	0.0254957	0.234309
						MMP14	0.868479	0.0167325	0.196532
						TUBB1	0.873107	0.0304741	0.254794
						MERTK	0.898598	0.03178	0.259697
						SLC39A8	0.90867	0.0017874	0.0659141
						C8orf33	0.913051	0.0246971	0.232396
						SLC24A4	0.917901	0.0315952	0.259697
						PARD6G	0.922361	0.0120946	0.169145
						HGF	0.927317	0.0293762	0.251834
						LILRB1	0.932081	0.000830146	0.0435229
						PIP5K1C	0.93607	0.0104361	0.158547
						CD163	0.936557	0.00301906	0.087637
						ETV5	0.944596	0.0135089	0.178454
						SS18L2	0.945185	0.0179378	0.202686
						MGC12916	0.946786	0.0284643	0.247228
						ABCC2	0.951461	0.0179626	0.202686
						MRC1	0.96177	0.0125035	0.172309
						SMAGP	0.967586	0.00990816	0.155538
						IL4I1	0.970803	0.0170953	0.198324
						DLEU7	0.972221	0.0179542	0.202686
						FN1	0.980988	0.0114711	0.165149
						SLAMF8	0.990657	0.0183399	0.204048
						TPST1	0.992761	0.000333679	0.0259452
						ETFBKMT	0.993936	0.0189906	0.206677
						SNHG20	1.00114	0.014764	0.185104
						C1orf131	1.00248	0.0129582	0.175389
						INTS14	1.00347	0.0133747	0.177997
						AKAP5	1.00708	0.0248828	0.232964
						RETN	1.01423	0.0215061	0.218425
						P2RY1	1.02124	0.0239331	0.229608
						UBE2E2	1.02296	0.0113114	0.164384
						SIGLEC1	1.02971	0.0314804	0.259333
						LRP12	1.03036	0.00358091	0.0935385
						CYP2R1	1.0331	0.0139583	0.181375
						ZFAND4	1.04779	0.00179447	0.0659906
						RUNDC3B	1.05785	0.0160042	0.192956
						LAIR1	1.05929	0.0002345	0.021499
						STARD5	1.08248	0.0151338	0.187603
						ABLIM3	1.08684	0.019124	0.207045
						CD84	1.08707	0.000201982	0.0196071
						MITF	1.08715	0.00238864	0.0771868
						CCL4L1	1.09129	0.00467871	0.106131
						BNIP3	1.10224	0.00104979	0.0493025
						NINL	1.11006	0.0164494	0.194757
						FLVCR2	1.11008	0.00537469	0.114327
						CTSK	1.11199	0.0247762	0.232643
						NREP	1.11373	0.0206945	0.215294
						SNHG7	1.13162	0.0229775	0.225204
						CLEC6A	1.13446	0.0225032	0.222373
						VWDE	1.13599	0.0215724	0.218425
						THUMPD2	1.13831	0.00323242	0.0894642
						CD33	1.1473	0.00948721	0.152744
						C11orf96	1.1477	0.0271877	0.241836
						KIF18A	1.16806	0.00826992	0.141976
						CYYR1	1.18961	0.0259517	0.236286
						PHPT1	1.19378	0.00391597	0.0982863
						ADTRP	1.19557	0.0189231	0.206677
						PAX8-AS1	1.21099	0.00470031	0.106438
						EBI3	1.22648	0.0244763	0.231479
						CCDC36	1.23563	0.00964891	0.153474
						CHIT1	1.24039	0.0221682	0.221202
						ASGR1	1.27287	0.00898701	0.148902
						AMPH	1.27959	0.00387342	0.0975894
						CLEC1B	1.28692	0.00778691	0.136706
						COL8A2	1.29215	0.01544	0.189403
						ADGRE4P	1.29225	0.0227495	0.223799
						LOC100506142	1.29914	0.00460146	0.105294
						CACFD1	1.30726	0.00222156	0.0733228
						LILRB5	1.31349	0.00742538	0.133944
						IL1RL1	1.32511	0.000609543	0.0370838
						MS4A6E	1.42962	0.00865942	0.145818
						LRRN3	1.45181	0.0280878	0.245898
						GJA1	1.45665	0.0231029	0.225428
						ADAMDEC1	1.50003	0.000762985	0.0425018
						GABRR2	1.51669	0.00434056	0.101785
						TRPA1	1.56417	0.00877782	0.147249
						TMEM52B	1.61181	0.000334091	0.0259452
						MSC-AS1	1.62183	0.000391798	0.0284076
						ZNF662	1.62358	0.0156431	0.191088
						PTGDR	1.63238	0.00126145	0.0544239
						ROS1	1.6617	0.0256679	0.234638
						TBX21	1.66663	0.0187349	0.205773
						CCL13	1.70063	0.00776271	0.136644
						LOC100505635	1.73857	0.0249685	0.232964
						CD163L1	1.75283	0.000975252	0.0476862
						HBG1	1.78636	0.012039	0.169145
						GGT5	1.81172	0.00254552	0.080155
						OLIG2	1.88631	8.09e-05	0.0107934
						DDR2	1.9089	0.00334839	0.0915227
						AP3B2	1.95413	0.0200901	0.211507
						ALOX15B	2.02962	0.000239332	0.0217908
						PRR16	2.13041	0.000811175	0.0434151
						SIGLEC8	2.16409	0.00329033	0.0906868
						ZCWPW2	2.24004	0.000140321	0.0151846
						LOC100505921	2.49295	0.000918415	0.0459277
						HBG2	2.57982	2.05e-05	0.00459253

## Sheet: Supp Table 8 Upstream
Supplementary Table 8. Inegenuity Pathway Analysis predicted Upstream Regulator
Deceased vs. ≤28 days
Predicted Activation State	Upstream Regulator		Activation z-score	p-value of overlap	Target Molecules in Dataset
Inhibited	DAP3		-3.606	4.11e-24	MT-ATP6,MT-ATP8,MT-CO1,MT-CO2,MT-CO3,MT-CYB,MT-ND1,MT-ND2,MT-ND3,MT-ND4,MT-ND4L,MT-ND5,MT-ND6
	ALKBH1		-2.828	4.29e-15	MT-ATP6,MT-CO1,MT-CO2,MT-CYB,MT-ND2,MT-ND4,MT-ND4L,MT-ND5
	NSUN3		-2.828	4.29e-15	MT-ATP6,MT-CO1,MT-CO2,MT-CYB,MT-ND2,MT-ND4,MT-ND4L,MT-ND5
	LONP1		-2.887	2.15e-11	MT-ATP6,MT-ATP8,MT-CO1,MT-CO2,MT-CO3,MT-CYB,MT-ND1,MT-ND2,MT-ND3,MT-ND4,MT-ND4L,MT-ND5,MT-ND6,SOD1
	TWNK		-2.985	4.54e-11	MT-CO1,MT-CYB,MT-ND1,MT-ND2,MT-ND3,MT-ND4,MT-ND4L,MT-ND5,MT-ND6
	MALSU1		-2.236	6.34e-09	MT-CO1,MT-CO2,MT-ND1,MT-ND4,MT-ND6
	LIF		-2.692	1.84e-08	GRAMD2B,HES1,HGF,IGF1,MT-ATP6,MT-CO1,MT-CO2,MT-CO3,MT-CYB,MT-ND1,MT-ND2,MT-ND3,MT-ND4,MT-ND4L,MT-ND5,MT-ND6,OLIG1,OLIG2
	MRPL14		-2.236	2.19e-08	MT-CO1,MT-CO2,MT-ND1,MT-ND4,MT-ND6
	MRPL12		-2.2	5.76e-08	MT-CO1,MT-CO2,MT-ND1,MT-ND2,MT-ND6
	pCPT-cAMP		-2.402	1.82e-07	MT-ND1,MT-ND2,MT-ND3,MT-ND4,MT-ND4L,MT-ND5
	TFE3		-2.646	1.49e-05	ATP5PO,MT-ATP6,MT-CO1,MT-CYB,MT-ND1,MT-ND2,MT-ND5
	FBXW7		-2.828	2.09e-05	MT-ATP6,MT-CO1,MT-CO2,MT-CO3,MT-CYB,MT-ND1,MT-ND4,MT-ND4L
	PPARGC1B		-2.636	0.000162	ACADM,ATP5PO,MT-ATP6,MT-CO1,MT-CO2,MT-ND1,MT-ND2
	testosterone		-3.025	0.000396	BCL7B,CCNC,CYB5A,IGF1,JUND,MT-CO1,MT-CO2,MT-CO3,MT-CYB,MT-ND5,NKX3-1,NOS2,RAB2A,RAI14,SLC39A8,STK11
	metribolone		-2.608	0.00256	AKAP12,COX7A2,CPEB3,FLVCR2,HIBCH,IGF1,NDUFB1,NDUFB10,NKX3-1,NOS2,PART1,SLC25A11,SYTL2,TPD52,TPI1,UAP1
	KLF4		-2.524	0.00433	ANKRD17,BMI1,CCL2,HES1,IRF6,IRX3,KRT19,NOS2,NUDT21,PPL,S100A14,TEAD1
	DDX5		-2	0.0199	COX7A2,MT-CO2,NDUFA5,NDUFB1
	PTEN		-2.918	0.0381	BACE2,CCNC,CPEB3,CTSB,DRAP1,G0S2,HGF,IGF1,JUND,KRT19,MT-ATP6,MT-CO2,MT-CYB,MT-ND1,NKX3-1,NOS2,OTUB2,POLD2
	Esrra		-2	0.0402	ACADM,ATP5PO,HGF,NDUFA5,PPP1R1B
	STK11		-2.333	0.046	BCL7B,CCL2,COX7A2,ECM2,MRPS10,NOS2,POLD2,SPARCL1,TPI1
	atorvastatin		-2.419	0.0549	CCL2,GJA1,NOS2,NR1H3,RNU4-1,RNU4-2,SOD1
	17-alpha-ethinylestradiol		-2.219	0.107	H2AX,IGF1,KRT19,TFF3,TGM2
Activated	actinonin		3.051	9.23e-21	MT-ATP6,MT-CO1,MT-CO2,MT-CO3,MT-CYB,MT-ND1,MT-ND2,MT-ND3,MT-ND4,MT-ND4L,MT-ND5,MT-ND6,PSPH
	SIRT3		3.159	1.07e-11	ACADM,MT-ATP6,MT-CO1,MT-CO2,MT-CO3,MT-CYB,MT-ND1,MT-ND2,MT-ND3,MT-ND4,MT-ND4L,MT-ND5,MT-ND6
	GSKJ4		3.606	2.98e-10	MICOS13,MT-ATP6,MT-ATP8,MT-CO1,MT-CO2,MT-CO3,MT-CYB,MT-ND1,MT-ND2,MT-ND3,MT-ND4,MT-ND5,MT-ND6
	miR-2392 (miRNAs w/seed AGGAUGG)		2.441	4.65e-10	MT-CO1,MT-CO2,MT-CYB,MT-ND2,MT-ND4,MT-ND5
	mir-2392		2.439	4.65e-10	MT-CO1,MT-CO2,MT-CYB,MT-ND2,MT-ND4,MT-ND5
	N1,N11-diethylnorspermine		2.449	4.59e-08	MT-CO1,MT-CO2,MT-ND3,MT-ND4,MT-ND4L,MT-ND6
	FLCN		2.824	5.4e-08	ATP5PO,MT-ATP6,MT-CO1,MT-CO2,MT-CYB,MT-ND1,MT-ND2,MT-ND5
	aristolochic acid I		2	4.27e-05	MT-CO1,MT-CO3,MT-CYB,NOS2
	5-fluorouracil		3.742	0.000177	ATP5PO,DRAM1,EIF3E,FBL,MT-CO1,MT-CO2,MT-ND3,MT-ND4,MT-ND4L,MT-ND6,NCL,RPL35A,RPL6,TPI1,UPP1,ZNF43
	fluticasone propionate		2.932	0.00053	ALOX15B,CCL2,CCL8,CD163,CXCL5,GLDN,RNASE2,TGM2,TPST1,VSIG4
	torin1		2	0.000819	COX7A2,EIF3E,NDUFB1,NDUFB10,PABPC1,RPL34,RPL35A,RPL6,TPI1,TPT1
	ST1926		3	0.00132	COX7A2,EIF3E,PABPC1,RPL6,SOD1,TMEM258,TPT1,TRIR,UBE2M
	LARP1		2.236	0.00226	EIF3E,PABPC1,RPL34,RPL35A,RPL6,TPT1
	PSMB11		2.646	0.00388	MT-ATP6,MT-CO1,MT-CO3,MT-ND1,MT-ND2,MT-ND5,MT-ND6
	SOX1		2	0.00655	ANKRD17,HES1,IRX3,NUDT21,TEAD1
	SPP1		2.178	0.0106	CCL2,CD163,CXCL5,IGF1,ITGB3,NOS2,SELENOW,SPARCL1
	CST5		2.538	0.0151	AKAP12,ARHGAP29,CTSB,DRAP1,EBNA1BP2,MAL2,NCL,NDUFB1,NUMA1,PPL
	BACH1		2	0.0179	ATP5PO,CALM1 (includes others),IGF1,SLC25A22
	SOX3		2	0.0407	ANKRD17,IRX3,NUDT21,TEAD1
	GMNN		2	0.0455	ANKRD17,IRX3,NUDT21,TEAD1
	GnRH analog		2.121	0.0924	CCNC,CCP110,CXCL5,CYB5A,LRRC23,NDUFB1,PABPC1,PSMB4,UBE2M
>28 days vs. ≤28 days
Predicted Activation State	Upstream Regulator		Activation z-score	p-value of overlap	Target Molecules in Dataset
Inhibited	metribolone		-3.203	0.000153	AKAP12,ALDOA,ATP5ME,ATP6V0E2,ATP6V1G1,B4GALT1,BRIP1,C14orf28,COX5B,COX6C,COX7A2,CPEB3,CYB561,CYC1,D2HGDH,ERRFI1,FAM126A,FLVCR2,HIBCH,HOMER1,HOMER2,HSD17B10,IGF1,IGFBP5,IRS2,ITGB4,KRT18,MDH2,MLYCD,MRPL34,NDUFB1,NDUFB2,NDUFB8,NDUFC1,NKX3-1,NOS2,OXA1L,PPA1,RAB4A,RIMS1,SLC22A5,SLC35A3,SMAD3,SREBF2,STK39,TIMP2,TM9SF2,TPI1,UQCRC2,VCAN
	MYCN		-2.649	0.000317	ABCA1,ABCA6,ALDOA,BMI1,CDH11,EEF1D,EGFR,EIF5A,EZH1,FBN1,FKBP9,FN1,GATA6,ITGA2,LGALS1,LRRN3,NCL,PA2G4,PHGDH,RBBP7,RPL18,RPL18A,RPL27A,RPL3,RPL6,RPL7,RPS19,RPS3,SDC2,SIRT1,TGM2,TIMP2,TPI1,TUFM,VIM
	estrogen		-2.622	0.00078	ABCA1,AP3D1,CCL2,CCNB2,CDC25C,CYBB,DHFR,EGFR,ERBB3,FBLN1,FN1,FTH1,GJA1,IGF1,IGFBP5,IL1RL1,IRS1,LGALS1,LIG1,MCM3,MCM5,MVD,MYB,NRIP1,OXTR,PRDM15,PTTG1,RAB11A,RRM2,SCRIB,SMAD3,SOD1,STAT5A,TBX21
	ESR2		-2.482	0.000838	ABCA1,AKAP12,ANXA4,AQP3,ARID4A,ATP2B1,BCAT1,CCL2,CCT4,CLDN4,CLEC1B,COL7A1,DNAH11,EGFR,EXOSC7,FBL,FBLN1,FBN1,FN1,FOXQ1,GJA1,GM2A,GNL3,GPSM2,GSTP1,H2AX,HSPA2,IGF1,ILF2,ITGA2,KRT16,KRT19,KRT6B,LILRB5,LRP1B,LRRN3,MCM5,MDK,MMP14,MRPS18B,NKX3-1,NOS2,OTUB2,PA2G4,PABPC1,POLE3,PPP1R3C,PROM1,PSMC4,PTGFR,PYCR1,RDH10,RETN,RORC,SEMA3F,SMAD3,SMAD4,SPAG5,SRPRB,SUSD4,TGM2,TIMP2,TMEM182,TSPAN13,TUFM,UCK2,VIM
	PTGER2		-2.523	0.0011	ANAPC1,ANAPC2,CCNB2,CKAP2L,CLEC6A,ECM1,ECT2,ESRRA,H2AX,KIF22,NOS2,PABPN1,RRN3,SPAG5,TIMP2,TTK
	beta-estradiol		-3.37	0.00137	ABCA1,ACADM,ADAMDEC1,AKAP12,ALDH18A1,ALDH3A2,ALDH7A1,ALDOA,ANXA4,AP3B2,AP3D1,ARID4A,ARSB,ATP2B1,ATP5ME,B4GALT1,BCAS1,BCAT1,CCDC17,CCL2,CCNB2,CDC123,CDC20,CDC25C,CDH11,CDR2,CENPM,CGN,CHAF1A,CLDN4,CLEC1B,COL7A1,COL8A2,CTSB,CTSK,CXCL6,CYB561,CYBB,CYP1B1,DIAPH2,DIAPH3,DRAM1,DSP,DUSP5,E4F1,EGFR,EIF2S1,EIF3A,ELF3,EMG1,ENAH,ERBB3,ERBB4,ERRFI1,ESRRA,ETFBKMT,FAM3D,FBLN1,FBN1,FGFBP1,FGFR3,FN1,FRK,GABRP,GJA…
	TP63		-2.798	0.00289	ARL14EP,ATG4A,CAVIN2,CD82,CDC25C,CYP2F1,ECM1,EGFR,EPHA2,ERBB3,FBN1,FGFR3,FLOT2,FN1,GPNMB,GRHL2,HSPA8,INSR,ITGA2,ITGB4,KRT10,KRT6B,MIR205HG,MMP14,MPZL2,MYB,PARD6G,PAX9,PIK3CA,POLD2,PPP1R13L,PTPN13,REXO4,RRM2,SCRIB,SERPINF1,SLC7A11,SMAD3,SMAD4,SPRR3,STK11,STON2,TPP1,TRAF4,TRIM29,VIM,WNT4,WWTR1
	SIX5		-2.412	0.00386	COL9A2,DMPK,IGFBP5,KRT18,SIX4,WNT4
	CD38		-2.701	0.00457	ALDOA,BNIP3,CPEB3,CRELD2,DRC1,FN1,IGHG1,IL5RA,JCHAIN,LMO7,PGM1,PYCR1,SCEL,SLAIN1,SLC39A8,ST7,STK39,TPI1,UCK2,VIM
	EGFR		-2.42	0.00623	APLP2,BCL7C,CCL2,CD33,CTSK,EGFR,EIF5A,EPHA2,ERBB3,ERBB4,FBN1,GJA1,GRN,HSPB1,HSPE1,IGF1,IGF2BP3,IGFBP5,IL33,ITGA2,JUND,KRT16,MMP14,NCL,NDUFB8,NOS2,NUTF2,PA2G4,PABPC1,PROM1,PSMB4,PSMB5,PTGER4,PTPRF,RAI14,RBBP7,SLC22A5,SLC7A11,ST6GAL1,STEAP4,TACSTD2,TGM2,TPST1,TSPAN13,UQCRC2,VCAN,VIM,WNT4
	KLF4		-3.445	0.00648	ASPRV1,BMI1,CCL2,CST6,DSP,DUSP5,ECSIT,EPHA2,FN1,HEY1,HEY2,HSPB1,IRS1,IRX3,KRT13,KRT19,MRC1,NOS2,PEG3,PPL,PROM1,S100A14,SEMA3F,SMAD1,SMAD4,SPRR1A,SPRR3,TBX3,TPK1,VARS2,VIM,YAP1
	PPARG		-2.488	0.00694	ABCA1,ACADM,ALOX15B,AQP3,ARL4D,ATP5PO,CAVIN2,CCL2,CEACAM5,CXCL6,EGFR,ESRRA,FN1,GAK,HMOX1,IGF1,IGFBP5,IL33,INSR,IRS1,IRS2,KEAP1,KRT18,KRT19,MKNK2,MLYCD,MMP14,MRC1,MVD,NOS2,NR1H3,PDE3B,PMM1,PMVK,PPIC,PTPRF,RETN,RNF144B,RORC,SIRT1,SOD1,SPRR1A,TBCC,VAMP8,VIM,VLDLR,WWTR1,YWHAE
	E2f		-2.377	0.00793	CDC25C,DDX11,DHFR,GAS2L1,GINS2,H4C14,IGF1,ITGB4,LIG1,MCM3,MCM5,MYB,RRM2,TCF3,TMEM126B,TTK
	MYC		-6.132	0.00797	ABCA1,ACADM,ACSS1,AFMID,AHCY,AKAP12,ALDH18A1,ALDOA,ANXA4,ASPRV1,ATP5IF1,BCAT1,BCR,BMI1,CCNB2,CDC20,CDC25C,CDK11B,CHP1,COX5B,CST6,CTSB,DDX11,DHFR,DSP,DUSP5,EBI3,ECM1,ECSIT,EIF2B4,EIF2S1,EPHA2,EXOSC7,EZH1,FBL,FBN1,FN1,FTH1,GATA6,GJA1,GM2A,GOLGA2,H19,H3-3A/H3-3B,H4C14,HMOX1,HSP90AA1,HSPB1,HSPE1,IFI27,IL5RA,IRS1,IRX3,KRT6B,LAMP1,LGALS1,MCM5,MITF,MNT,MRC1,MRPL12,NCL,PA2G4,PEG3,PFKM,PIAS1,PIAS2,PNO1,PO…
	CDH1		-2.72	0.00952	EGFR,ERBB3,ERBB4,FN1,IFI27,KRT13,KRT18,KRT19,MMP14,MUC16,TPBG,VIM
	ACSL4		-2.333	0.0103	CAMK2D,CCDC28A,EGFR,KDM1A,KRT18,NKX3-1,SERPINF1,STK11,STK39
	CAB39L		-2.646	0.011	ATP5ME,COX5B,COX6C,COX7C,NDUFB2,NDUFB8,NDUFC1
	IL5		-2.875	0.0163	ALDOA,BNIP3,CCL2,CDC123,CLEC2B,CRELD2,DRC1,DUSP5,IGHG1,IGHM,IL1RL1,IL5RA,JCHAIN,LMO7,NOS2,PGM1,PSMB4,PYCR1,SCEL,SCRIB,SLAIN1,SLC39A8,ST7,STK39,SUPT6H,TPI1,UCK2,VIM,YES1
	TEAD2		-2.121	0.0175	BBOX1,EDNRA,IGFBP5,KAZN,NUAK1,SDC2,SH3D19,TRNP1
	Gm21596/Hmgb1		-2.216	0.0182	CXCL6,H19,IL1RL1,NOS2,PROM1
	TEAD3		-2.121	0.0195	BBOX1,EDNRA,IGFBP5,KAZN,NUAK1,SDC2,SH3D19,TRNP1
	2-amino-1-methyl-6-phenylimidazo-4-5-b-pyridine		-2.646	0.0265	CCT4,HSP90AA1,HSPA8,HSPE1,PSMB4,RAB11A,RAB2A
	Z-LLL-CHO		-2.053	0.0305	CCL2,CLDN4,CTSB,DDR2,DHFR,DMD,EIF5A,ETV5,G0S2,GSTP1,HMOX1,HSP90AA1,HSPA8,HSPB1,IRS1,IRS2,ITPR2,ITPR3,MAD1L1,MITF,MMP14,MYB,NOS2,PSMA3,PSMC4,PSMD3,PTGFR,SCRIB,SIRT1,SOD1,TTK,VAMP8
	CEBPB		-4.097	0.0309	BRMS1L,CCL2,CCNB2,CCP110,CD163,CDC20,CDC25C,CENPM,CHIT1,DHFR,DIAPH3,EIF2S1,FBLN1,FN1,H2AX,H4C14,H4C15,HSP90AA1,HSPA8,HSPE1,IGF1,INSR,IRS1,IRS2,KIF22,KRT18,KRT6B,LIG1,LSM8,MCM3,MCM5,MXD3,NOS2,NR1H3,OXTR,PA2G4,POLD2,PRSS8,PSMA3,PTGFR,RBBP7,RRM2,SIRT1,SPAG5,SPRR1A,SSRP1,UBA2,VCAN,VIM,VLDLR,WDR90,XDH
	HSF2		-2	0.0323	CCT4,HSPA1A/HSPA1B,HSPB1,PSMB5,PSMC4,PSMD3
	SFN		-2.213	0.0339	DSP,KRT18,NET1,PPP1R1B,VIM
	EGF		-3.002	0.0369	ADAM17,AQP3,B4GALT1,CAVIN2,CDC25C,CDH11,CEACAM7,CXCL6,DUSP5,EGFR,ELF3,ENAH,EPHA2,ERRFI1,EZH1,FN1,GAK,GGT5,GJA1,GPS2,GSTA4,GSTP1,HMOX1,IGF1,IGFBP5,IRS1,ITGA2,JUND,KRT16,KRT19,KRT5,MAD1L1,MUC4,NCL,NOS2,PFKM,PROM1,PSMB4,PSMB5,PTTG1,RRM2,SMAD1,SMAD3,TGM2,TUFM,VCAN,VIM
	REL		-2.121	0.0417	CAMK2D,CCL2,CTU2,DDX11,DHFR,DNAH1,ETV5,FN1,IGHG1,IGHM,NOS2,PCBP4,PFKM,PHGDH,PIK3CA,PPP1R14B,RDH10,RORC,SLC22A15,SLC35A3,TBCA,TTK,VIM
	S-nitroso-N-acetyl-DL-penicillamine		-2.177	0.0419	BNIP3,CCL2,HMOX1,HSPA1A/HSPA1B,MARCKSL1,MSH6,NOS2,TNNI3
	ADAMTS18		-2.219	0.0441	CLDN4,COL9A2,FBLIM1,ITGB4,SDK2
	atorvastatin		-2.379	0.0616	ABCA1,ABCC2,CCL2,CYBB,EDNRA,ELF3,GJA1,HBG2,HMOX1,LSS,MVD,NOS2,NR1H3,PMVK,RNU4-1,RNU4-2,SNORD3A,SOD1,TCIM,TM7SF2
	AREG		-3.162	0.0631	ARHGAP11A,CCNB2,CDC20,CDH11,DESI2,EGFR,ELF3,RRM2,SLC36A1,SSRP1
	prostaglandin E2		-2.055	0.281	AQP3,CCL13,CCL2,EGFR,ESRRA,FBXO31,FN1,GJA1,HMOX1,IGF1,IGFBP5,IGHG1,IL4I1,MITF,MMP14,MRC1,NOS2,NR1H3,PTGER4,RORC,SIRT1,TBX21,TGFBR3,VIM
	testosterone propionate		-2	0.359	ABO,CLTB,OXTR,PSCA
	arachidonic acid		-2.138	0.387	ABCA1,AQP3,EGFR,HMOX1,MRC1,PRKD1,SRSF3,VIM
	Insulin		-2.245	0.431	ABCA1,ACADM,ALDOA,CCL2,CCT4,CYBB,EGFR,ERRFI1,FN1,GSTP1,GUCY2C,HMOX1,HSP90AA1,HSPA8,HSPE1,IGF1,INSR,IRS1,IRS2,MAT1A,MDH2,NOS2,NR1H3,PPIC,RETN,SIRT1,SOD1,SREBF2,SRSF3,TBX21,UBTF,UQCRC2,VLDLR,WNT4
	IL10RA		-2.837	0.489	BNIP3,CYP2F1,DRAM1,ECM1,FAM83B,FBN1,FN1,GSAP,HSPA8,LRIG3,MECOM,MYB,NOS2,NR1H3,REPS2,SLAMF8,SLC7A11,TGM2,TMEM30B,TNNI3,TTLL6
	Hdac		-2.55	0.543	BMI1,CSF2RA,EDNRA,EGFR,HLA-DRA,IGF1,IRX3,MMP14,RORC,TBX3,WNT4
	KLF11		-2.449	1	CCL2,ITGA2,MMP14,MMP8,SMAD3,SMAD4,TIMP2
Activated	ST1926		3.8	5.84e-05	ATP5ME,COX5B,COX6C,COX7A2,COX7C,EIF5A,HMGN2,HSP90AA1,ILF2,LGALS1,PABPC1,PITX1,PSMD3,RPL18A,RPL6,SNRPG,SOD1,SRSF3,TMEM258,TPT1,TRIR,UBE2M,UQCRC2,VAMP8,YWHAE
	CST5		3.353	7.3e-05	AKAP12,AP3D1,CBY1,CHD3,CTSB,DOCK9,DSP,EEF1D,ESRRA,FAM133B,GNL3,GOLGA2,GRSF1,ITPR3,KRT23,MAL2,MNT,NCL,NDUFB1,NOM1,NOP53,NUMA1,NUP155,PABPN1,PDCL3,PPIC,PPL,PRSS8,SLC4A1AP,SLC7A11,SRSF9,SSRP1,VCAN,VIM,VPS25,VPS36
	torin1		2.515	0.00017	ALDOA,ATP5ME,ATP6V0E2,COX5B,COX6C,COX7A2,CYC1,EEF1D,EIF3A,NDUFB1,NDUFB2,NDUFB8,NDUFC1,PABPC1,PPA1,RPL10A,RPL18,RPL27A,RPL3,RPL6,RPL7,RPS19,RPS3,TPI1,TPT1,VIM
	miR-124-3p (and other miRNAs w/seed AAGGCAC)		3.082	0.000623	ASPRV1,B4GALT1,CCL2,CDCA7L,CHP1,CPNE3,CYP1B1,DRAM1,ECI2,FAM83H,GAS2L1,IQGAP1,LDLRAP1,LRRC1,MPHOSPH9,MTMR6,NIBAN2,NME4,PGM1,PPP1R13L,PRKD1,RDH10,SHLD2,SLC22A5,STX10,TJP2,TMEM263,TNFRSF21,TRIM29
	PHF12		2.828	0.00108	EIF3A,EXOSC6,EXOSC9,H2AX,PA2G4,TSR1,WDR12,ZNHIT6
	LARP1		2.887	0.00289	EEF1D,EIF3A,PABPC1,RPL10A,RPL18,RPL27A,RPL3,RPL6,RPL7,RPS19,RPS3,TPT1,VIM
	5-fluorouracil		2.892	0.00441	ALDOA,ANXA4,ATP5ME,ATP5PO,BNIP3,CCT4,CD82,COX6C,DRAM1,ELOB,EPHA2,FBL,HMOX1,HSPA8,HSPE1,ILF2,ITGB4,MAD1L1,MT-ND3,MT-ND6,NCL,OAZ1,PSMB5,RPL10A,RPL18,RPL27A,RPL6,RPL7,SESN1,SLC7A11,SNRPE,SNRPG,TPI1,TRAF4,UQCRC2,YAP1
	TFEB		2.799	0.00545	ARSB,ATP6V1A,ATP6V1H,CTSB,CTSK,LAMP1,PSAP,TPP1
	ZEB1		3.231	0.00651	CD163,ESRP2,FN1,GRHL2,ITGB4,KRT18,KRT19,MAL2,MPZL2,MRC1,VIM,XDH
	miR-483-3p (miRNAs w/seed CACUCCU)		2.123	0.00836	CREBL2,GJA1,GPSM2,IGF1,PRXL2A,SMAD4,TMPRSS11E,YAP1
	miR-16-5p (and other miRNAs w/seed AGCAGCA)		3.426	0.00913	BMI1,C17orf80,C2orf74,CREBL2,EGFR,GOLPH3L,GRN,H3-3A/H3-3B,HMOX1,HSPA1A/HSPA1B,IGF1,ITGA2,LAMTOR3,MYB,NAPG,NIPAL2,PDCD6IP,PPP2R5C,PRIMPOL,SLC25A22,SRPRB,TPI1,TPPP3
	KDM5A		2.5	0.0122	CERT1,COQ5,COX7A2,DMPK,GADD45GIP1,HMOX1,HOMER1,MCM3,MLYCD,MRPL12,MYL6B,NDUFB8,PARK7,PMPCB,RYR3,TIMM50
	CD 437		2.8	0.0162	ALDOA,ATP5PO,CDC25C,COX6C,COX7A2,COX7C,EIF5A,FTH1,HMGN2,HSP90AA1,HSPA8,ILF2,LGALS1,PABPC1,PITX1,PSMD3,SNRPG,SOD1,SRSF3,TMEM258,UBE2M,UQCRC2
	mir-182		2.158	0.0175	ADCY6,BRMS1L,FN1,NFASC,PIK3CA,SLC39A7,TCF3,VIM
	RICTOR		2.085	0.018	ATP5PO,ATP6V0E2,ATP6V1A,ATP6V1G1,ATP6V1H,COX7A2,CYC1,IRS2,NDUFB2,NDUFB8,NDUFC1,POMP,PPA1,PSMA3,PSMB4,PSMB5,PSMC4,PSMD3,RORC,RPL10A,RPL18,RPL6,RPL7,RPS19,RPS3,UQCRC2,UQCRHL,YAP1
	SOX1		3.162	0.0208	DSP,DUSP5,ECSIT,EPHA2,IRS1,IRX3,PEG3,SMAD1,SMAD4,YAP1
	calcitriol		2.878	0.0269	AFAP1L2,AKAP12,ATP2B1,BCAT1,CD163,CDC20,CENPM,CHAF1A,CTSK,CXCL6,CYBB,ECT2,EGFR,ERBB3,ERRFI1,ETV5,FBN1,FGFR3,FN1,FTH1,GATA6,IGF1,IGFBP5,KIF22,KRT23,LAMP1,LGALS1,LIG1,MCM3,MCM5,MECOM,MRC1,MTRES1,NDUFB2,NME4,NOS2,NUP37,NUP43,PADI1,PDP2,PPP1CA,PTGFR,PYCR1,RORC,RRM2,SOD1,SPAG5,TBX21,TIMM50,TIMP2,TJP2,TMEM160,UMPS
	FDFT1		2	0.0272	ABCA1,LRP1,NR1H3,SREBF2
	asoprisnil		2.433	0.0286	AQP3,EGFR,G0S2,IGF1,WNT4,XDH
	exenatide		2.207	0.0286	ABCA1,HMOX1,IRS2,MRC1,NOS2,SIRT1
	IgG		2.838	0.0331	ARSB,CCL2,CLDN4,DSP,FGFBP1,FN1,HDGF,HSPB1,JUND,KRT10,KRT13,KRT16,KRT18,LGALS1,PALD1,PPL,PRSS8,RND3,SERPINF1,SPINT1,TACSTD2,TRIM29
	ZEB2		2.583	0.0352	CTSG,ESRP2,GATM,KRT18,KRT19,MITF,MYB,VIM
	CDKN2A		2.259	0.0353	BMI1,CCL18,CCL2,CDC25C,CDCA7L,CHAF1A,CXCL6,DHFR,FBL,FBXO5,FMN2,GNL3,H2AX,IGF2BP3,IGFBP5,IL5RA,LAMP1,MCM5,MRC1,NKX3-1,PEG3,POLD2,POLD3,POU2AF1,RBBP7,RRM2,TPP1,VIM
	fluticasone propionate		2.563	0.0362	ABLIM3,ADAMDEC1,ALOX15B,CCL2,CCL4L1/CCL4L2,CD163,CHIT1,CSF2RA,EBI3,HLA-DRA,IFI27,IRS2,SERPINF1,SESN1,SLC16A6,ST6GAL1,TGM2,TPST1
	SOX3		3.162	0.0366	DSP,DUSP5,ECSIT,EPHA2,IRS1,IRX3,PEG3,SMAD1,SMAD4,YAP1
	ATP7B		2.449	0.0451	CDC20,H1-2,H19,LSS,PTTG1,SREBF2
	GMNN		3.162	0.0454	DSP,DUSP5,ECSIT,EPHA2,IRS1,IRX3,PEG3,SMAD1,SMAD4,YAP1
	miR-1-3p (and other miRNAs w/seed GGAAUGU)		2.586	0.0493	AP3D1,CSRP1,EGFR,GAK,GJA1,GOLGA7,H3-3A/H3-3B,IGF1,ITGB4,KCNJ2,KIF2A,LRP1,MTMR12,PTPRF,SFXN1,SLC25A22,SRSF9,SYNE1,TPPP
	miR-204-5p (and other miRNAs w/seed UCCCUUU)		2.121	0.0495	ATP2B1,CAMK2D,CDH11,ITGB4,SMAD1,SMAD3,SMAD9,STXBP1
	let-7		2.266	0.05	BCAT1,C14orf28,CDC20,CPEB3,DMD,DZIP1,FBL,FN1,IGF1,IRS2,MCM3,MCM5,PA2G4,PNO1,PPP1R12B,PROM1,RDH10,RRM2,SMAD4,VIM,YAP1,ZNF512B
	DNMT3A		2.138	0.11	AKAP12,CYBB,EDNRA,ETV5,IRS1,ITPR3,JCHAIN,MUC4,P2RY1,PCBP4,PLCB4,POU2AF1,PPP1R3C,PTPN13,TGM2,TNNI3
	hexamethylene bisacetamide		2.216	0.183	FN1,HSPA8,MYB,RPL18,USF2
	filgrastim		3.373	0.249	BEX3,CAVIN2,CD163,CFAP100,CHAF1A,CHIT1,CYB561,CYBB,CYP1B1,EXT1,G0S2,GATA6,HEY1,HILPDA,HLA-DRA,IL5RA,LAIR1,MMP8,MPEG1,MYB,NHS,NKX3-1,OLIG2,PPP1R12B,PROK2,RPS6KA3,SIGLEC8,SLC25A22,SMAD3,SSRP1,TUSC1,VIM,ZNF584
	ID2		2.557	0.404	EEF1D,FGFR3,HOMER2,IL1RL1,LGALS1,MECOM,MYB,PAWR,PROM1,PTPN13,PTPN3,SEMA3F,SOX13,TGFBR3,TRAF4,VANGL2
	cholesterol		2.964	0.487	ABCA1,ABCA6,CCL2,CTSK,CYBB,FN1,MITF,MMP14,MMP8,MPEG1,NR1H3,PMVK,SREBF2,STARD5,TM7SF2,UQCRHL
	FFAR3		2	1	ADGRV1,CLEC6A,ITPR3,PITPNM3
	triamcinolone acetonide		2.111	1	AQP3,ARL4C,CHL1,EDNRA,MXRA5,NOS2,PALLD,PSPH,SLC31A2,VLDLR,ZNF263
	methapyrilene		2	1	ACADM,ALDOA,CTSB,CTSS,EIF2S1,HMOX1,IGF1,NR2F6
	NCOA1		2.137	1	ABCA1,ALDOA,ANAPC2,ERBB3,IGF1,PARD6B,PAWR
	SYK		2.214	1	AKAP12,CCL2,ITGB4,PIK3CA,PLEKHG1
	DIO3		2	1	CFH,FOXQ1,KIF18A,SNED1

## Sheet: Supp Table 9 Dis&func
Supplementary Table 9. Inegenuity Pathway Analysis predicted Disease or Function annotation
Deceased vs. ≤28 days
Predicted Activation State	Diseases or Functions Annotation	p-value	Activation z-score	Molecules
Decreased	Activation of peripheral blood neutrophils	5.5e-13	-2.774	MT-CO1,MT-CYB,MT-ND2,MT-ND3,MT-ND4,MT-ND4L,MT-ND5,MT-ND6
	Activation of granulocytes	2.69e-07	-2.362	CCL2,IL1RL1,LTF,MT-CO1,MT-CYB,MT-ND2,MT-ND3,MT-ND4,MT-ND4L,MT-ND5,MT-ND6,S100A7,TPT1
	Activation of phagocytes	3.5e-07	-2.156	BPI,CCL2,CCL8,CD163,CXCL5,GJA1,HGF,IGF1,IL1RL1,IRF6,LTF,MT-CO1,MT-CYB,MT-ND2,MT-ND3,MT-ND4,MT-ND4L,MT-ND5,MT-ND6,NOS2,NR1H3,RNASE2,S100A7,SOD1,TGM2,TPT1
	Activation of neutrophils	1.33e-06	-2.532	CCL2,LTF,MT-CO1,MT-CYB,MT-ND2,MT-ND3,MT-ND4,MT-ND4L,MT-ND5,MT-ND6,S100A7
	Activation of leukocytes	0.000458	-2.074	BPI,CCL2,CCL8,CD163,CLEC1B,CXCL5,GJA1,HGF,IGF1,IL1RL1,IRF6,LAIR1,LILRB1,LRRC23,LTF,MT-CO1,MT-CYB,MT-ND2,MT-ND3,MT-ND4,MT-ND4L,MT-ND5,MT-ND6,NOS2,NR1H3,RNASE2,S100A7,SOD1,STK11,TGM2,TPT1
>28 days vs. ≤ 28 days
Predicted Activation State	Diseases or Functions Annotation	p-value	Activation z-score	Molecules
Decreased	Central nervous system solid tumor	2.08e-16	-2.017	AASS,ABCA1,ABCA13,ABCC2,ABLIM3,ACADM,ACIN1,ACP6,ACSS1,ADAMDEC1,ADCY2,ADGRF1,ADGRV1,ADH1B,ADNP,ADPRHL1,AFDN,AFTPH,AHCY,AHCYL1,AHDC1,AKAP12,ALDH18A1,ALDH3A2,ALDOA,ALMS1,ALOX15B,ALPK3,AMPD3,AMPH,ANAPC1,ANAPC2,ANK2,ANKRD11,ANKRD16,ANKRD18A,ANKRD36C,ANKRD42,ANKRD6,ANP32E,AP3B2,AP3D1,APEH,APOBR,AQP3,ARFGEF3,ARHGAP11A,ARHGAP21,ARHGAP31,ARHGAP32,ARHGEF5,ARL4C,ARSB,ASGR1,ASPRV1,ATG4A,ATG9B,ATN1,ATP11C,ATP…
	Glioma	2.58e-16	-2.183	AASS,ABCA1,ABCA13,ABCC2,ABLIM3,ACADM,ACIN1,ACP6,ACSS1,ADAMDEC1,ADCY2,ADGRF1,ADGRV1,ADH1B,ADNP,ADPRHL1,AFDN,AFTPH,AHCY,AHCYL1,AHDC1,AKAP12,ALDH18A1,ALDH3A2,ALDOA,ALMS1,ALOX15B,ALPK3,AMPD3,AMPH,ANAPC1,ANAPC2,ANK2,ANKRD11,ANKRD16,ANKRD18A,ANKRD36C,ANKRD42,ANKRD6,ANP32E,AP3B2,AP3D1,APEH,APOBR,AQP3,ARFGEF3,ARHGAP11A,ARHGAP21,ARHGAP31,ARHGAP32,ARHGEF5,ARL4C,ARSB,ASGR1,ASPRV1,ATG4A,ATG9B,ATN1,ATP11C,ATP…
	Cell viability of tumor cell lines	3.56e-06	-5.153	ABCA1,ADAM17,ADNP,AKAP5,AKAP7,ANAPC1,AQP3,ATP7B,BCR,BMI1,BNIP3,BRIP1,CAMK2D,CCL18,CCL2,CD82,CDK11B,CLDN4,CLK3,CSNK1E,CYBB,DUSP5,ECM1,EGFR,EIF2S1,EIF3A,ELF3,EPHA2,ERBB3,ERBB4,ERCC2,ERRFI1,ESRRA,FBL,FBXO5,FGFR3,FN1,FTH1,GAK,GSTP1,H19,HCG11,HEY1,HMOX1,HOPX,HSPA1A/HSPA1B,HSPA8,HSPB1,IGF1,IGF2BP3,IGFBP5,IGHM,IK,INSR,IQGAP1,IRS2,ISG20L2,ITPR3,KAZN,KDM1A,KIF18A,KIFC3,KRT19,LAMTOR3,LIG1,LSM8,MAP3K1,MAPK1…
	Organization of cytoplasm	5.48e-06	-2.245	ABCA1,ABLIM3,ADCY6,ADGRF1,ADNP,AFDN,AKAP12,AKAP5,ALDOA,ALMS1,ALS2CL,ANAPC2,ANK2,ANP32A,APLP2,ARHGAP21,ARHGAP32,ARHGEF5,ARL1,ARSB,ATP2B1,B9D2,BCR,BICD2,BLZF1,BNIP3,CAMSAP2,CBY1,CCDC13,CCDC66,CCL13,CCL2,CCP110,CD82,CDC20,CDC42BPG,CDK11B,CEP20,CEP250,CEP43,CERT1,CFAP44,CFAP70,CGN,CHD3,CHL1,CHP1,CLEC1B,COG4,CORO2B,CPEB3,CROCC,CSRP1,CTSS,CUL7,CYBB,DIAPH2,DIAPH3,DNAAF1,DNAH5,DSP,DYNC1LI2,DZIP1,DZIP1L,E…
	Neoplasia of tumor cell lines	6.91e-05	-2.87	ABCA1,ADAM17,BAP1,BCDIN3D,CCL2,CD82,CLEC6A,CRIP2,CTSB,CXCL6,CYBB,DDR2,ECT2,EGFR,ENAH,EPHA2,ERBB4,FAF1,FGFR3,FN1,FZD6,GJA1,GRHL2,GRN,GRSF1,H2AX,HMOX1,HSP90AA1,IGF1,IGF2BP3,IGHM,IL1RL1,IL33,ITGA2,ITGB4,KDM1A,KMT2A,LGR4,MAPK15,MECOM,MMP8,MRTFB,MUC16,MUC4,MYB,NOS2,PAX9,PDCD6IP,PROM1,PTTG1,RPS6KA3,SERPINB4,SERPINF1,SIX1,SLC7A11,SMAD3,SPNS2,STK11,TACSTD2,TBX21,TBX3,TCF3,TFCP2,TGFBR3,TNFRSF21,TRAF4,TRIM…
	Cell survival	0.000152	-5.646	ABCA1,ADAM17,ADNP,AFAP1L2,AKAP5,AKAP7,ANAPC1,AQP3,ATP7B,BAP1,BCR,BEX3,BMI1,BNIP3,BRIP1,CAMK2D,CAMLG,CCL18,CCL2,CD82,CDCA7L,CDK11B,CEACAM5,CFH,CIAPIN1,CLDN4,CLK3,CSF2RA,CSNK1E,CTSB,CYBB,CYP1B1,DCLRE1A,DUSP5,ECM1,ECT2,EGFR,EIF2S1,EIF3A,ELF3,EMSY,EPHA2,ERBB3,ERBB4,ERCC2,ERRFI1,ESRRA,ETV5,FBL,FBXO5,FGFR3,FN1,FTH1,GAK,GATA6,GJA1,GPNMB,GSTP1,H19,H2AX,HCG11,HDGF,HEY1,HMGN1,HMOX1,HOPX,HSD17B10,HSPA1A/HSP…
	Microtubule dynamics	0.000267	-2.741	ABLIM3,ADCY6,ADGRF1,ADNP,AFDN,AKAP12,AKAP5,ALMS1,ANAPC2,ANK2,ANP32A,APLP2,ARHGAP32,ARHGEF5,ARSB,ATP2B1,B9D2,BCR,BICD2,CAMSAP2,CBY1,CCDC13,CCDC66,CCL2,CCP110,CD82,CDC20,CDC42BPG,CDK11B,CEP20,CEP250,CEP43,CFAP44,CFAP70,CGN,CHL1,CHP1,CLEC1B,CPEB3,CROCC,CSRP1,CTSS,CUL7,CYBB,DIAPH2,DIAPH3,DNAAF1,DNAH5,DSP,DYNC1LI2,DZIP1,DZIP1L,ECT2,EDNRA,EGFR,ENAH,EPHA2,EPS8L2,ERBB4,ERC1,FBXO31,FBXO5,FGFR3,FN1,GAS2L1,…
	Organization of cytoskeleton	0.000312	-2.245	ABLIM3,ADCY6,ADGRF1,ADNP,AFDN,AKAP12,AKAP5,ALDOA,ALMS1,ANAPC2,ANK2,ANP32A,APLP2,ARHGAP32,ARHGEF5,ARSB,ATP2B1,B9D2,BCR,BICD2,CAMSAP2,CBY1,CCDC13,CCDC66,CCL13,CCL2,CCP110,CD82,CDC20,CDC42BPG,CDK11B,CEP20,CEP250,CEP43,CFAP44,CFAP70,CGN,CHD3,CHL1,CHP1,CLEC1B,CORO2B,CPEB3,CROCC,CSRP1,CTSS,CUL7,CYBB,DIAPH2,DIAPH3,DNAAF1,DNAH5,DSP,DYNC1LI2,DZIP1,DZIP1L,ECT2,EDNRA,EGFR,ENAH,EPHA2,EPPK1,EPS8L2,ERBB4,ERC1,…
	Cell viability	0.000852	-5.408	ABCA1,ADAM17,ADNP,AFAP1L2,AKAP5,AKAP7,ANAPC1,AQP3,ATP7B,BAP1,BCR,BMI1,BNIP3,BRIP1,CAMK2D,CAMLG,CCL18,CCL2,CD82,CDK11B,CEACAM5,CIAPIN1,CLDN4,CLK3,CSF2RA,CSNK1E,CTSB,CYBB,CYP1B1,DCLRE1A,DUSP5,ECM1,ECT2,EGFR,EIF2S1,EIF3A,ELF3,EMSY,EPHA2,ERBB3,ERBB4,ERCC2,ERRFI1,ESRRA,FBL,FBXO5,FGFR3,FN1,FTH1,GAK,GATA6,GJA1,GPNMB,GSTP1,H19,H2AX,HCG11,HDGF,HEY1,HMGN1,HMOX1,HOPX,HSD17B10,HSPA1A/HSPA1B,HSPA8,HSPB1,IGF1,…
	Colony formation	0.00116	-2.045	ADAM17,AHCY,AKAP12,ARHGAP32,BCR,BMI1,CCL2,CD82,CDCA7L,CEACAM5,CLDN4,CSF2RA,CTSB,DUSP5,EGFR,EGLN2,ELF3,EPHA2,ERBB3,ERBB4,ERRFI1,FBLN1,FGFBP1,FGFR3,FN1,GJA1,GRN,H2AX,HDGF,HSPA1A/HSPA1B,IGF1,IGFBP5,IK,INSR,IQGAP1,IRS1,ITGB4,JUND,KLF8,KMT2A,KRT19,LGR4,MAD1L1,MAP3K1,MCPH1,MDK,MECOM,MITF,MKNK2,MMP14,MRPS18B,MUC4,MYB,NKX3-1,PIK3CA,PPP2R5C,PRMT6,PROK2,PTPN3,PTPRF,PTTG1,RANBP9,RPS19,RPS6KA3,RRM2,SEMA3F,SH…
	Formation of cilia	0.0012	-2.359	ABLIM3,ALMS1,B9D2,CBY1,CCDC13,CCDC66,CCP110,CDC42BPG,CDK11B,CEP20,CEP250,CEP43,CFAP70,CROCC,DNAAF1,DNAH5,DZIP1,DZIP1L,IFT122,INSR,OFD1,PCNT,RAB11A,RAB29,TMEM231,VANGL2,WDR34,WDR60,WDR90,WWTR1
	Sphere formation of breast cancer cell lines	0.00147	-2.758	ECM1,EGFR,ERBB3,FGFR3,IGF1,STK11,TBX3,TFCP2
	Respiratory system development	0.00199	-2.335	ABCA1,ADAM17,AKAP12,B4GALT1,CBY1,CCDC40,CCL2,CDH11,CLEC1B,CTSK,DNAAF1,EGFR,ERRFI1,ETV5,FBLN1,FBN1,FGFR3,GAK,GRHL2,HEY2,HOPX,HSPB11,HYDIN,IGF1,IGFBP5,MMACHC,MMP14,NDST1,NOS2,NPAS3,PKD1,PPP1CA,PTGER4,PYGO2,RC3H2,RDH10,ROBO1,SIRT1,SIX1,SIX4,SLC7A11,SPEF2,STAT5A,SYNE1,TRAF4,TULP3
	Proliferation of tumor cells	0.00213	-2.161	AFAP1L2,AHCY,ANK2,BMI1,BNIP3,CCL18,CD33,CD82,CLDN4,CSF2RA,CST6,CTSB,CTSS,EGFR,EPHA2,ERBB3,FBXW11,FGFR3,GJA1,GRN,HDGF,HMOX1,HSPA1A/HSPA1B,IGF1,IGFBP5,IGHM,INSR,IRS1,KMT2A,KRT19,LAIR1,LGALS1,LILRB1,MMP14,MYB,NELFE,NKX3-1,NOP53,NOS2,PARK7,PIK3CA,PIM3,PPP1R13L,PTPN13,PTPN2,PTPN3,PYGO2,RORC,SDC2,SIRT1,SIX1,SMAD3,SMAD4,SNHG7,SOD1,SRSF3,STK11,THRB,TIMP2,UBA2,VCAN,YAP1,YES1
	Development of central nervous system	0.00226	-2.454	AFDN,ALDH3A2,APLP2,ARSB,ATN1,BCR,BICD2,BLOC1S2,CD82,CDCA7L,CHL1,DNAH5,DNAJC30,DSCAML1,EGFR,EIF2B4,EIF2B5,ELP1,ENAH,EPHA2,ERBB3,ERBB4,ERCC2,EXT1,FGFR3,FN1,FOXP2,FOXQ1,FZD6,GAK,GAS8,GRHL2,GSTP1,HDAC11,HEY1,HEY2,HOXB2,HYDIN,IGF1,IRS2,IRX3,JHY,KIF2A,MACROH2A2,MARCKSL1,MCPH1,MDK,MECOM,MRTFB,NDST1,NOS2,NPAS3,NR1H3,OLIG2,PA2G4,PARD3,PEX2,PHGDH,PLCB4,PYGO2,RDH10,ROBO1,ROGDI,RPS6KA3,SCRIB,SEMA3F,SH2B1,SLC…
Increased	Non-hematological solid tumor	3.63e-44	2.459	AASS,ABCA1,ABCA13,ABCA6,ABCC2,ABLIM3,ABO,ACADM,ACIN1,ACP6,ACSS1,ACTR3C,ACYP1,ADAM17,ADAMDEC1,ADCY2,ADCY6,ADGRF1,ADGRV1,ADH1B,ADNP,ADPRHL1,ADTRP,AFAP1L2,AFDN,AFMID,AFTPH,AHCY,AHCYL1,AHDC1,AIFM2,AK4,AKAP12,AKAP5,AKAP7,ALDH18A1,ALDH3A2,ALDH7A1,ALDOA,ALKBH5,ALMS1,ALOX15B,ALPK3,ALS2CL,AMPD3,AMPH,ANAPC1,ANAPC2,ANK2,ANKRD11,ANKRD16,ANKRD18A,ANKRD36,ANKRD36C,ANKRD42,ANKRD6,ANP32A,ANP32E,ANXA4,AP3B2,AP3D1…
	Non-melanoma solid tumor	3.05e-43	2.668	AASS,ABCA1,ABCA13,ABCA6,ABCC2,ABLIM3,ABO,ACADM,ACIN1,ACP6,ACSS1,ACTR3C,ACYP1,ADAM17,ADAMDEC1,ADCY2,ADCY6,ADGRF1,ADGRV1,ADH1B,ADNP,ADPRHL1,ADTRP,AFAP1L2,AFDN,AFMID,AFTPH,AHCY,AHCYL1,AHDC1,AIFM2,AK4,AKAP12,AKAP5,AKAP7,ALDH18A1,ALDH3A2,ALDH7A1,ALDOA,ALKBH5,ALMS1,ALOX15B,ALPK3,ALS2CL,AMPD3,AMPH,ANAPC1,ANAPC2,ANK2,ANKRD11,ANKRD16,ANKRD18A,ANKRD36,ANKRD36C,ANKRD42,ANKRD6,ANP32A,ANP32E,ANXA4,AP3B2,AP3D1…
	Solid tumor	1.67e-42	2.507	AASS,ABCA1,ABCA13,ABCA6,ABCC2,ABLIM3,ABO,ACADM,ACIN1,ACP6,ACSS1,ACTR3C,ACYP1,ADAM17,ADAMDEC1,ADCY2,ADCY6,ADGRF1,ADGRV1,ADH1B,ADNP,ADPRHL1,ADTRP,AFAP1L2,AFDN,AFMID,AFTPH,AHCY,AHCYL1,AHDC1,AIFM2,AK4,AKAP12,AKAP5,AKAP7,ALDH18A1,ALDH3A2,ALDH7A1,ALDOA,ALKBH5,ALMS1,ALOX15B,ALPK3,ALS2CL,AMPD3,AMPH,ANAPC1,ANAPC2,ANK2,ANKRD11,ANKRD16,ANKRD18A,ANKRD36,ANKRD36C,ANKRD42,ANKRD6,ANP32A,ANP32E,ANXA4,AP3B2,AP3D1…
	Malignant solid tumor	3.47e-42	2.325	AASS,ABCA1,ABCA13,ABCA6,ABCC2,ABLIM3,ABO,ACADM,ACIN1,ACP6,ACSS1,ACTR3C,ACYP1,ADAM17,ADAMDEC1,ADCY2,ADCY6,ADGRF1,ADGRV1,ADH1B,ADNP,ADPRHL1,ADTRP,AFAP1L2,AFDN,AFMID,AFTPH,AHCY,AHCYL1,AHDC1,AIFM2,AK4,AKAP12,AKAP5,AKAP7,ALDH18A1,ALDH3A2,ALDH7A1,ALDOA,ALKBH5,ALMS1,ALOX15B,ALPK3,ALS2CL,AMPD3,AMPH,ANAPC1,ANAPC2,ANK2,ANKRD11,ANKRD16,ANKRD18A,ANKRD36,ANKRD36C,ANKRD42,ANKRD6,ANP32A,ANP32E,ANXA4,AP3B2,AP3D1…
	Extracranial solid tumor	4.63e-42	2.178	AASS,ABCA1,ABCA13,ABCA6,ABCC2,ABLIM3,ABO,ACADM,ACIN1,ACP6,ACSS1,ACTR3C,ACYP1,ADAM17,ADAMDEC1,ADCY2,ADCY6,ADGRF1,ADGRV1,ADH1B,ADNP,ADPRHL1,ADTRP,AFAP1L2,AFDN,AFMID,AFTPH,AHCY,AHCYL1,AHDC1,AIFM2,AK4,AKAP12,AKAP5,AKAP7,ALDH18A1,ALDH3A2,ALDH7A1,ALDOA,ALKBH5,ALMS1,ALOX15B,ALPK3,ALS2CL,AMPD3,AMPH,ANAPC1,ANAPC2,ANK2,ANKRD11,ANKRD16,ANKRD18A,ANKRD36,ANKRD36C,ANKRD42,ANKRD6,ANP32A,ANP32E,ANXA4,AP3B2,AP3D1…
	Cancer	1.26e-41	2.191	AASS,ABCA1,ABCA13,ABCA6,ABCC2,ABLIM3,ABO,ACADM,ACIN1,ACP6,ACSS1,ACTR3C,ACYP1,ADAM17,ADAMDEC1,ADCY2,ADCY6,ADGRF1,ADGRV1,ADH1B,ADNP,ADPRHL1,ADTRP,AFAP1L2,AFDN,AFMID,AFTPH,AHCY,AHCYL1,AHDC1,AIFM2,AK4,AKAP12,AKAP5,AKAP7,ALDH18A1,ALDH3A2,ALDH7A1,ALDOA,ALKBH5,ALMS1,ALOX15B,ALPK3,ALS2CL,AMPD3,AMPH,ANAPC1,ANAPC2,ANK2,ANKRD11,ANKRD16,ANKRD18A,ANKRD36,ANKRD36C,ANKRD42,ANKRD6,ANP32A,ANP32E,ANXA4,AP3B2,AP3D1…
	Epithelial neoplasm	2.73e-41	2.536	AASS,ABCA1,ABCA13,ABCA6,ABCC2,ABLIM3,ABO,ACADM,ACIN1,ACP6,ACSS1,ACTR3C,ACYP1,ADAM17,ADAMDEC1,ADCY2,ADCY6,ADGRF1,ADGRV1,ADH1B,ADNP,ADPRHL1,ADTRP,AFAP1L2,AFDN,AFMID,AFTPH,AHCY,AHCYL1,AHDC1,AIFM2,AK4,AKAP12,AKAP5,AKAP7,ALDH18A1,ALDH3A2,ALDH7A1,ALDOA,ALKBH5,ALMS1,ALOX15B,ALPK3,ALS2CL,AMPD3,AMPH,ANAPC1,ANAPC2,ANK2,ANKRD11,ANKRD16,ANKRD18A,ANKRD36,ANKRD36C,ANKRD42,ANKRD6,ANP32A,ANP32E,ANXA4,AP3B2,AP3D1…
	Carcinoma	5.41e-41	2.325	AASS,ABCA1,ABCA13,ABCA6,ABCC2,ABLIM3,ABO,ACADM,ACIN1,ACP6,ACSS1,ACTR3C,ACYP1,ADAM17,ADAMDEC1,ADCY2,ADCY6,ADGRF1,ADGRV1,ADH1B,ADNP,ADPRHL1,ADTRP,AFAP1L2,AFDN,AFMID,AFTPH,AHCY,AHCYL1,AHDC1,AIFM2,AK4,AKAP12,AKAP5,AKAP7,ALDH18A1,ALDH3A2,ALDH7A1,ALDOA,ALKBH5,ALMS1,ALOX15B,ALPK3,ALS2CL,AMPD3,AMPH,ANAPC1,ANAPC2,ANK2,ANKRD11,ANKRD16,ANKRD18A,ANKRD36,ANKRD36C,ANKRD42,ANKRD6,ANP32A,ANP32E,ANXA4,AP3B2,AP3D1…
	Tumorigenesis of tissue	1.71e-40	2.325	AASS,ABCA1,ABCA13,ABCA6,ABCC2,ABLIM3,ABO,ACADM,ACIN1,ACP6,ACSS1,ACTR3C,ACYP1,ADAM17,ADAMDEC1,ADCY2,ADCY6,ADGRF1,ADGRV1,ADH1B,ADNP,ADPRHL1,ADTRP,AFAP1L2,AFDN,AFMID,AFTPH,AHCY,AHCYL1,AHDC1,AIFM2,AK4,AKAP12,AKAP5,AKAP7,ALDH18A1,ALDH3A2,ALDH7A1,ALDOA,ALKBH5,ALMS1,ALOX15B,ALPK3,ALS2CL,AMPD3,AMPH,ANAPC1,ANAPC2,ANK2,ANKRD11,ANKRD16,ANKRD18A,ANKRD36,ANKRD36C,ANKRD42,ANKRD6,ANP32A,ANP32E,ANXA4,AP3B2,AP3D1…
	Adenocarcinoma	2.65e-30	2.431	AASS,ABCA1,ABCA13,ABCA6,ABCC2,ABLIM3,ABO,ACADM,ACIN1,ACP6,ACSS1,ACYP1,ADAM17,ADAMDEC1,ADCY2,ADCY6,ADGRF1,ADGRV1,ADH1B,ADNP,ADPRHL1,AFAP1L2,AFDN,AFMID,AFTPH,AHCY,AHCYL1,AHDC1,AIFM2,AKAP12,AKAP5,AKAP7,ALDH18A1,ALDH3A2,ALDH7A1,ALDOA,ALKBH5,ALMS1,ALOX15B,ALPK3,AMPD3,AMPH,ANAPC1,ANAPC2,ANK2,ANKRD11,ANKRD18A,ANKRD36,ANKRD36C,ANKRD42,ANKRD6,ANP32A,ANP32E,ANXA4,AP3B2,AP3D1,APBB2,APEH,APLP2,APOBR,ARFGEF3,…
	Digestive organ tumor	6.08e-30	2.297	AASS,ABCA1,ABCA13,ABCA6,ABCC2,ABLIM3,ACADM,ACIN1,ACP6,ACSS1,ACTR3C,ACYP1,ADAM17,ADAMDEC1,ADCY2,ADCY6,ADGRF1,ADGRV1,ADH1B,ADNP,ADPRHL1,ADTRP,AFAP1L2,AFDN,AFMID,AFTPH,AHCY,AHCYL1,AHDC1,AIFM2,AKAP12,AKAP5,AKAP7,ALDH18A1,ALDH3A2,ALDH7A1,ALDOA,ALKBH5,ALMS1,ALOX15B,ALPK3,ALS2CL,AMPD3,AMPH,ANAPC1,ANAPC2,ANK2,ANKRD11,ANKRD18A,ANKRD36,ANKRD36C,ANKRD6,ANP32A,ANP32E,ANXA4,AP3B2,AP3D1,APBB2,APEH,APLP2,APOBR,…
	Abdominal neoplasm	2.51e-29	2.469	AASS,ABCA1,ABCA13,ABCA6,ABCC2,ABLIM3,ABO,ACADM,ACIN1,ACP6,ACSS1,ACTR3C,ACYP1,ADAM17,ADAMDEC1,ADCY2,ADCY6,ADGRF1,ADGRV1,ADH1B,ADNP,ADPRHL1,ADTRP,AFAP1L2,AFDN,AFMID,AFTPH,AHCY,AHCYL1,AHDC1,AIFM2,AKAP12,AKAP5,AKAP7,ALDH18A1,ALDH3A2,ALDH7A1,ALDOA,ALKBH5,ALMS1,ALOX15B,ALPK3,ALS2CL,AMPD3,AMPH,ANAPC1,ANAPC2,ANK2,ANKRD11,ANKRD18A,ANKRD36,ANKRD36C,ANKRD42,ANKRD6,ANP32A,ANP32E,ANXA4,AP3B2,AP3D1,APBB2,APEH,…
	Intraabdominal organ tumor	3.54e-29	2.737	AASS,ABCA1,ABCA13,ABCA6,ABCC2,ABLIM3,ACADM,ACIN1,ACP6,ACSS1,ACTR3C,ACYP1,ADAM17,ADAMDEC1,ADCY2,ADCY6,ADGRF1,ADGRV1,ADH1B,ADNP,ADPRHL1,ADTRP,AFAP1L2,AFDN,AFMID,AFTPH,AHCY,AHCYL1,AHDC1,AIFM2,AKAP12,AKAP5,AKAP7,ALDH18A1,ALDH3A2,ALDH7A1,ALDOA,ALKBH5,ALMS1,ALOX15B,ALPK3,ALS2CL,AMPD3,AMPH,ANAPC1,ANAPC2,ANK2,ANKRD11,ANKRD18A,ANKRD36,ANKRD36C,ANKRD6,ANP32A,ANP32E,ANXA4,AP3B2,AP3D1,APBB2,APEH,APLP2,APOBR,…
	Nonpituitary endocrine tumor	6.52e-28	2.391	ABCA1,ABCA13,ABCA6,ABCC2,ABO,ACADM,ACIN1,ACP6,ACSS1,ACYP1,ADAM17,ADCY2,ADCY6,ADGRF1,ADGRV1,ADNP,ADPRHL1,AFAP1L2,AFDN,AFMID,AHCY,AHCYL1,AHDC1,AIFM2,AK4,AKAP12,AKAP5,AKAP7,ALDH18A1,ALDH3A2,ALDH7A1,ALKBH5,ALMS1,ALOX15B,ALPK3,ALS2CL,AMPD3,AMPH,ANAPC1,ANAPC2,ANK2,ANKRD11,ANKRD16,ANKRD18A,ANKRD36,ANKRD36C,ANKRD42,ANKRD6,ANP32E,AP3B2,AP3D1,APBB2,APLP2,APOBR,ARFGEF3,ARHGAP11A,ARHGAP21,ARHGAP31,ARHGAP32,A…
	Endocrine gland tumor	7.15e-26	2.398	AASS,ABCA1,ABCA13,ABCA6,ABCC2,ABO,ACADM,ACIN1,ACP6,ACSS1,ACTR3C,ACYP1,ADAM17,ADCY2,ADCY6,ADGRF1,ADGRV1,ADNP,ADPRHL1,AFAP1L2,AFDN,AFMID,AHCY,AHCYL1,AHDC1,AIFM2,AK4,AKAP12,AKAP5,AKAP7,ALDH18A1,ALDH3A2,ALDH7A1,ALKBH5,ALMS1,ALOX15B,ALPK3,ALS2CL,AMPD3,AMPH,ANAPC1,ANAPC2,ANK2,ANKRD11,ANKRD16,ANKRD18A,ANKRD36,ANKRD36C,ANKRD42,ANKRD6,ANP32E,AP3B2,AP3D1,APBB2,APLP2,APOBR,ARFGEF3,ARHGAP11A,ARHGAP21,ARHGAP3…
	Formation of solid tumor	3.32e-24	3.534	AASS,ABCA1,ABCA13,ABCA6,ABCC2,ABLIM3,ACADM,ACIN1,ACP6,ACSS1,ACTR3C,ACYP1,ADAM17,ADAMDEC1,ADCY2,ADCY6,ADGRF1,ADGRV1,ADH1B,ADNP,ADPRHL1,ADTRP,AFAP1L2,AFDN,AFTPH,AHCY,AHCYL1,AHDC1,AKAP12,AKAP7,ALDH18A1,ALDH3A2,ALDH7A1,ALDOA,ALMS1,ALOX15B,ALPK3,ALS2CL,AMPD3,AMPH,ANAPC1,ANAPC2,ANK2,ANKRD11,ANKRD16,ANKRD18A,ANKRD36,ANKRD36C,ANKRD42,ANKRD6,ANP32A,ANP32E,ANXA4,AP3B2,AP3D1,APBB2,APEH,APLP2,APOBR,AQP3,ARFG…
	Frequency of tumor	1.55e-18	4.169	AASS,ABCA1,ABCA13,ABCA6,ABCC2,ABLIM3,ACADM,ACIN1,ACP6,ACSS1,ACTR3C,ACYP1,ADAM17,ADAMDEC1,ADCY2,ADCY6,ADGRF1,ADGRV1,ADH1B,ADNP,ADTRP,AFAP1L2,AFDN,AFTPH,AHCY,AHCYL1,AHDC1,AKAP12,AKAP7,ALDH18A1,ALDH3A2,ALDH7A1,ALDOA,ALMS1,ALOX15B,ALPK3,ALS2CL,AMPH,ANAPC1,ANAPC2,ANK2,ANKRD11,ANKRD18A,ANKRD36,ANKRD36C,ANKRD6,ANP32A,ANP32E,ANXA4,AP3B2,AP3D1,APBB2,APEH,APLP2,APOBR,ARFGEF3,ARHGAP11A,ARHGAP21,ARHGAP31,ARH…
	Tumorigenesis of epithelial neoplasm	2.95e-18	3.283	AASS,ABCA1,ABCA13,ABCA6,ABCC2,ABLIM3,ACADM,ACIN1,ACP6,ACSS1,ACTR3C,ACYP1,ADAM17,ADAMDEC1,ADCY2,ADCY6,ADGRF1,ADGRV1,ADH1B,ADNP,ADTRP,AFAP1L2,AFDN,AFTPH,AHCY,AHCYL1,AHDC1,AKAP12,AKAP7,ALDH18A1,ALDH3A2,ALDH7A1,ALDOA,ALMS1,ALOX15B,ALPK3,ALS2CL,AMPH,ANAPC1,ANAPC2,ANK2,ANKRD11,ANKRD18A,ANKRD36,ANKRD36C,ANKRD6,ANP32A,ANP32E,ANXA4,AP3B2,AP3D1,APBB2,APEH,APLP2,APOBR,ARFGEF3,ARHGAP11A,ARHGAP21,ARHGAP31,ARH…
	Incidence of tumor	4.16e-18	4.375	AASS,ABCA1,ABCA13,ABCA6,ABCC2,ABLIM3,ACADM,ACIN1,ACP6,ACSS1,ACTR3C,ACYP1,ADAM17,ADAMDEC1,ADCY2,ADCY6,ADGRF1,ADGRV1,ADH1B,ADNP,ADTRP,AFAP1L2,AFDN,AFTPH,AHCY,AHCYL1,AHDC1,AKAP12,AKAP7,ALDH18A1,ALDH3A2,ALDH7A1,ALDOA,ALMS1,ALOX15B,ALPK3,ALS2CL,AMPH,ANAPC1,ANAPC2,ANK2,ANKRD11,ANKRD18A,ANKRD36,ANKRD36C,ANKRD6,ANP32A,ANP32E,ANXA4,AP3B2,AP3D1,APBB2,APEH,APLP2,APOBR,ARFGEF3,ARHGAP11A,ARHGAP21,ARHGAP31,ARH…
	Development of malignant tumor	2.46e-17	3.939	AASS,ABCA1,ABCA13,ABCA6,ABCC2,ABLIM3,ACADM,ACIN1,ACP6,ACSS1,ACTR3C,ACYP1,ADAM17,ADAMDEC1,ADCY2,ADCY6,ADGRF1,ADGRV1,ADH1B,ADNP,AFAP1L2,AFDN,AFTPH,AHCY,AHCYL1,AHDC1,AKAP12,AKAP7,ALDH18A1,ALDH3A2,ALDH7A1,ALDOA,ALMS1,ALOX15B,ALPK3,ALS2CL,AMPH,ANAPC1,ANAPC2,ANK2,ANKRD11,ANKRD18A,ANKRD36,ANKRD36C,ANKRD6,ANP32A,ANP32E,ANXA4,AP3B2,AP3D1,APBB2,APEH,APLP2,APOBR,ARFGEF3,ARHGAP11A,ARHGAP21,ARHGAP31,ARHGAP32,…
	Development of carcinoma	3.16e-17	3.192	AASS,ABCA1,ABCA13,ABCA6,ABCC2,ABLIM3,ACADM,ACIN1,ACP6,ACSS1,ACTR3C,ACYP1,ADAM17,ADAMDEC1,ADCY2,ADCY6,ADGRF1,ADGRV1,ADH1B,ADNP,AFAP1L2,AFDN,AFTPH,AHCY,AHCYL1,AHDC1,AKAP12,AKAP7,ALDH18A1,ALDH3A2,ALDH7A1,ALDOA,ALMS1,ALOX15B,ALPK3,ALS2CL,AMPH,ANAPC1,ANAPC2,ANK2,ANKRD11,ANKRD18A,ANKRD36,ANKRD36C,ANKRD6,ANP32A,ANP32E,ANXA4,AP3B2,AP3D1,APBB2,APEH,APLP2,APOBR,ARFGEF3,ARHGAP11A,ARHGAP21,ARHGAP31,ARHGAP32,…
	Development of digestive organ tumor	4.87e-16	2.957	AASS,ABCA1,ABCA13,ABCA6,ACADM,ACIN1,ACP6,ACSS1,ACTR3C,ACYP1,ADAM17,ADCY2,ADGRV1,ADH1B,ADNP,AFAP1L2,AFDN,AFTPH,AHDC1,AKAP12,AKAP7,ALDH18A1,ALDOA,ALMS1,ALPK3,ALS2CL,AMPH,ANAPC1,ANAPC2,ANK2,ANKRD11,ANKRD36,ANKRD36C,ANKRD6,ANP32E,ANXA4,AP3D1,APEH,APLP2,APOBR,ARFGEF3,ARHGAP11A,ARHGAP21,ARHGAP31,ARHGAP32,ARHGEF5,ARID4A,ARL14EP,ARMC10,ARSB,ASAH2,ATG4A,ATG9B,ATN1,ATP11C,ATP2B1,ATP5IF1,ATP5PO,ATP6V1H,BAIA…
	Liver lesion	1.3e-10	2.189	AASS,ABCA1,ABCA13,ABCC2,ABLIM3,ACIN1,ACTR3C,ADAM17,ADAMDEC1,ADCY2,ADGRF1,ADGRV1,ADH1B,ADNP,ADTRP,AFDN,AHDC1,AIFM2,AKAP12,ALDH7A1,ALMS1,ALOX15B,AMPH,ANAPC1,ANAPC2,ANK2,ANKRD11,ANKRD18A,ANKRD36,ANKRD36C,ANP32E,AP3D1,APBB2,ARFGEF3,ARHGAP21,ARHGAP32,ARID4A,ARL4D,ARMC10,ARSB,ASAH2,ATG9B,ATN1,ATP11C,ATP5ME,ATP7B,ATRIP,B4GALT1,B9D2,BAP1,BAZ1B,BCAT1,BCDIN3D,BCR,BEND7,BLZF1,BMI1,BNC1,BRD9,BRMS1L,C10orf67,…
	Uterine tumor	2e-10	2.169	AASS,ABCA1,ABCA13,ABCA6,ABCC2,ABLIM3,ACADM,ACIN1,ACSS1,ADCY2,ADCY6,ADGRV1,ADH1B,ADNP,AFDN,AFTPH,AHCY,AHCYL1,AHDC1,AKAP12,AKAP7,ALDH3A2,ALDOA,ALMS1,ALOX15B,ALPK3,ALS2CL,AMPH,ANK2,ANKRD11,ANKRD36,ANKRD36C,ANKRD6,ANP32E,AP3B2,AP3D1,APBB2,APOBR,ARFGEF3,ARHGAP31,ARHGAP32,ARHGEF5,ARID4A,ARL4D,ATG9B,ATP11C,ATP2B1,ATP6V0E2,ATP6V1A,ATP6V1H,ATP7B,ATRIP,BAIAP3,BAP1,BAZ1B,BCAS1,BCAT1,BCR,BEX3,BICD2,BMI1,BNC1…
	Development of adenocarcinoma	1.85e-09	2.166	AASS,ABCA1,ABCA13,ABCA6,ABCC2,ABLIM3,ACADM,ACIN1,ACP6,ACSS1,ACYP1,ADAMDEC1,ADCY2,ADCY6,ADGRF1,ADGRV1,ADNP,AFDN,AFTPH,AHCY,AHCYL1,AHDC1,AKAP12,AKAP7,ALDH3A2,ALDH7A1,ALDOA,ALMS1,ALOX15B,ALPK3,AMPH,ANAPC1,ANAPC2,ANK2,ANKRD11,ANKRD18A,ANKRD36,ANKRD36C,ANKRD6,ANP32A,ANP32E,AP3B2,AP3D1,APBB2,APEH,APLP2,APOBR,ARFGEF3,ARHGAP21,ARHGAP31,ARHGAP32,ARHGEF5,ARID4A,ARL4C,ARMC10,ATG9B,ATP11C,ATP2B1,ATP5IF1,ATP6…
	Development of non-small cell lung carcinoma	2.79e-05	2.375	ACIN1,ADCY2,ADGRF1,ADGRV1,AHDC1,ALDOA,ALPK3,ANAPC1,ANK2,ANP32A,APBB2,APLP2,APOBR,ARL4C,ATP2B1,ATP5IF1,BAP1,BAZ1B,BMI1,BRD9,BRIP1,C4orf3,CADPS2,CCDC178,CCDC40,CCNB2,CDC20,CDC42BPG,CFAP100,CFH,CHAF1A,CHD6,CHIT1,CKAP2L,CLDN4,CMYA5,CNGA1,CORO2B,CSF2RA,CSMD1,CTSG,CYP1B1,D2HGDH,DCLRE1A,DDR2,DDX11,DHFR,DIAPH3,DMD,DMPK,DMXL2,DNAH11,DNAH2,DNAH3,DNAH5,DNAH6,DNAH7,DNAH9,DSCAML1,ECT2,EGFR,ELF3,ENGASE,EPHA2,E…
	Lung adenocarcinoma	3.57e-05	2.375	ACIN1,ADCY2,ADGRF1,ADGRV1,AHDC1,ALDOA,ALPK3,ANAPC1,ANK2,ANP32A,APBB2,APLP2,APOBR,ARL4C,ATP2B1,ATP5IF1,BAP1,BAZ1B,BMI1,BRD9,BRIP1,C4orf3,CADPS2,CCDC178,CCDC40,CCNB2,CDC20,CDC42BPG,CFAP100,CFH,CHAF1A,CHD6,CHIT1,CKAP2L,CLDN4,CMYA5,CNGA1,CORO2B,CSF2RA,CSMD1,CTSG,CYP1B1,D2HGDH,DCLRE1A,DDR2,DDX11,DHFR,DIAPH3,DMD,DMPK,DMXL2,DNAH11,DNAH2,DNAH3,DNAH5,DNAH6,DNAH7,DNAH9,DSCAML1,ECT2,EGFR,ELF3,ENGASE,EPHA2,E…
	Non-small cell lung carcinoma	0.000117	2.595	ABCC2,ACIN1,ADAM17,ADCY2,ADGRF1,ADGRV1,AHDC1,AIFM2,ALDOA,ALMS1,ALPK3,ANAPC1,ANK2,ANP32A,APBB2,APLP2,APOBR,ARL4C,ATN1,ATP2B1,ATP5IF1,BAP1,BAZ1B,BMI1,BRD9,BRIP1,C4orf3,CADPS2,CBLC,CCDC178,CCDC40,CCNB2,CDC20,CDC42BPG,CEACAM5,CFAP100,CFH,CGGBP1,CHAF1A,CHD3,CHD6,CHIT1,CHL1,CHN2,CKAP2L,CLDN4,CMYA5,CNGA1,CORO2B,CSF2RA,CSMD1,CTSG,CUL7,CYP1B1,D2HGDH,DCLRE1A,DDR2,DDX11,DHFR,DIAPH3,DMD,DMPK,DMXL2,DNAH10,DNA…
	Familial cardiovascular disease	0.000252	2.2	ABCA1,ALPK3,ANK2,ATRIP,CAMLG,CCDC114,CCDC40,CCP110,CFH,CYB561,CYP2C19,DMD,DMPK,DNAAF1,DNAH1,DNAH11,DNAH5,DNAH9,DNAJC19,DRC1,DSP,EDNRA,EGFR,FBLN1,FBN1,FKRP,FLVCR2,GABRP,GABRR2,GATA6,GJA1,GRN,HEY2,HRH1,HYDIN,IGF1,INSR,IRS1,KCNJ2,LDLRAP1,MEIS2,MKRN2,MRTFB,MT-ATP8,NUP155,P2RY1,PDE3B,PIK3CA,PITPNM3,PKD1,PPP1R13L,PRKD1,RDH10,RETN,RORC,RPL6,RRM2,RSPH9,SARS2,SLC16A6,SMAD1,SMAD3,SMAD4,SMAD9,SYNE1,TGFBR3,T…
	Morbidity or mortality	0.000275	9.401	ABCA1,ACADM,ACSS1,ADAM17,ADGRV1,ADNP,ADTRP,AFDN,AKAP12,ALDOA,AMPH,ANAPC2,ANK2,APLP2,ARHGAP31,ARID4A,ASGR1,ATN1,ATP2B1,ATP7B,B4GALT1,BAP1,BCAT1,BICD2,BLOC1S2,BMI1,BRIP1,CAMLG,CBY1,CCL2,CCNB2,CCP110,CCS,CDC20,CERT1,CFH,CHAF1A,CIAPIN1,CLDN4,CLEC1B,CLEC6A,CNPY3,COL7A1,CSRP1,CTSB,CTSG,CUL7,CXCL6,CXXC1,CYBB,CYP2C19,DCLRE1A,DDX11,DHFR,DIAPH3,DMD,DNAJC21,DSP,E4F1,ECM1,ECSIT,ECT2,EDNRA,EGFR,EIF2S1,ELP1,EN…
	Apoptosis	0.000373	3.907	ABCA1,ABO,ACIN1,ADAM17,ADCY6,ADNP,AFAP1L2,AIFM2,AKAP12,ALDOA,ALKBH5,ALMS1,ALOX15B,ANP32A,ANXA4,APBB2,AQP3,ARHGEF5,ARMC10,ARSB,ASAH2,ATN1,ATP11C,B4GALT1,BAP1,BCR,BEX3,BLOC1S2,BMI1,BNIP3,BPI,CACFD1,CAMK2D,CAMLG,CCDC88B,CCL2,CCT4,CD33,CD82,CDC20,CDC25C,CDH11,CEACAM5,CERT1,CFH,CHL1,CIAPIN1,CLK3,CNGA3,CREBL2,CSF2RA,CSNK1E,CTSB,CTSG,CTSS,CUL7,CYBB,CYP1B1,CYP2F1,DAP,DDX11,DESI2,DHFR,DLEU7,DMPK,DRAM1,DSP…
	Lung carcinoma	0.000392	2.472	AASS,ABCA1,ABCA13,ABCA6,ABCC2,ACIN1,ACTR3C,ADAM17,ADCY2,ADGRF1,ADGRV1,AFAP1L2,AFDN,AFMID,AHCY,AHDC1,AIFM2,ALDOA,ALMS1,ALPK3,AMPH,ANAPC1,ANK2,ANKRD11,ANKRD18A,ANKRD36C,ANP32A,APBB2,APLP2,APOBR,ARHGAP21,ARHGEF5,ARL4C,ASAH2,ATN1,ATP11C,ATP2B1,ATP5IF1,ATP6V1H,BAP1,BAZ1B,BICD2,BLOC1S2,BLZF1,BMI1,BRD9,BRIP1,C4orf3,CA5B,CADPS2,CAMSAP2,CBLC,CCDC149,CCDC178,CCDC40,CCNB2,CCT4,CD163,CD163L1,CDC20,CDC42BPG,C…
	Organismal death	0.00044	9.577	ABCA1,ACADM,ACSS1,ADAM17,ADGRV1,ADNP,ADTRP,AFDN,AKAP12,ALDOA,AMPH,ANAPC2,ANK2,APLP2,ARHGAP31,ARID4A,ASGR1,ATN1,ATP2B1,ATP7B,B4GALT1,BAP1,BCAT1,BICD2,BLOC1S2,BMI1,BRIP1,CAMLG,CBY1,CCL2,CCNB2,CCP110,CCS,CDC20,CERT1,CFH,CHAF1A,CIAPIN1,CLDN4,CLEC1B,CNPY3,COL7A1,CSRP1,CTSB,CUL7,CXXC1,CYBB,CYP2C19,DCLRE1A,DDX11,DHFR,DIAPH3,DMD,DNAJC21,DSP,E4F1,ECM1,ECSIT,ECT2,EDNRA,EGFR,EIF2S1,ELP1,ENAH,ERBB3,ERBB4,ERC…
	Necrosis	0.000646	3.928	ADAM17,ADCY6,ADNP,AFAP1L2,AKAP12,AKAP7,ALDH3B1,ALDOA,ANP32A,ARMC10,ARSB,ASAH2,ATG4A,ATN1,ATP2B1,ATP7B,BAP1,BCR,BEX3,BMI1,BNIP3,BPI,CADPS2,CAMK2D,CAMLG,CBLC,CCDC88B,CCL2,CCP110,CCT4,CD33,CD82,CDC20,CDC25C,CDH11,CEACAM5,CERS5,CERT1,CFH,CHL1,CHP1,CIAPIN1,CLK3,CRACR2A,CREBL2,CSF2RA,CTSB,CTSG,CTSS,CUL7,CYBB,CYP1B1,CYP2F1,DCTN3,DESI2,DHFR,DLEU7,DMD,DMPK,DRAM1,DSP,DUSP5,E4F1,EDNRA,EEF1D,EGFR,EGLN2,EIF2B…
	Cell death of tumor cell lines	0.000779	2.577	ADAM17,ADNP,AKAP12,AKAP7,ARMC10,ARSB,ATG4A,ATN1,ATP2B1,BAP1,BCR,BMI1,BNIP3,CCL2,CCP110,CCT4,CD82,CDC20,CERS5,CFH,CLK3,CRACR2A,CSF2RA,CTSB,CTSG,CUL7,CYP1B1,DCTN3,DESI2,DHFR,DLEU7,DRAM1,DSP,E4F1,EGFR,EIF2B4,EIF2B5,EIF2S1,EIF5A,EMG1,EPHA2,ERBB3,ERBB4,ESRRA,FAF1,FAIM,FBLN1,FBXO31,FBXO5,FGFR3,FN1,FTH1,G0S2,GATA6,GJA1,GNA11,GPS2,GRHL2,GRN,GSTP1,H19,H2AX,HCG11,HDAC11,HMOX1,HSP90AA1,HSPA1A/HSPA1B,HSPA8,H…
	Familial midline defect	0.00155	2.2	CCL2,CCP110,CFAP57,EDNRA,ESRP2,FBLN1,GATA6,KDM1A,MEIS2,MRTFB,MTR,PARD3,PKD1,RDH10,TGFBR3,VANGL2
	Growth failure or short stature	0.00172	5.048	ABCA1,ACSS1,ALDH18A1,APLP2,ATP7B,B4GALT1,BAP1,CNPY3,COL9A2,CTSK,CUL7,DDR2,DDX11,EGFR,ELP1,ETV6,EVC2,FAM50A,FBN1,FGFR3,FN1,GADD45GIP1,GATA6,GJA1,GRHL2,H19,H2AX,H3-3A/H3-3B,HEY2,HIP1R,HMOX1,IGF1,IRS1,ITGA2,KIF19,KIF22,KMT2A,KMT2B,KRT6B,LAMTOR2,LGR4,LIG1,LRP1,MAGI2,MCM5,MEIS2,MMP14,MTERF3,MYO9A,NANS,NELFE,NOA1,PARD3,PARL,PCNT,PEX2,PHKG2,PKD1,PTPN2,PUS7,RAB33B,RASIP1,RDH10,RRN3,SCYL1,SH2B1,SIRT1,SIX1…
	Familial heart disease	0.00261	2.2	ALPK3,ANK2,CCDC114,CCDC40,CCP110,DMD,DMPK,DNAAF1,DNAH1,DNAH5,DNAJC19,DRC1,DSP,EDNRA,FBLN1,FBN1,FKRP,GATA6,GJA1,HEY2,HRH1,HYDIN,IRS1,KCNJ2,MEIS2,MRTFB,MT-ATP8,NUP155,PKD1,PRKD1,RDH10,RORC,RSPH9,SMAD4,SYNE1,TGFBR3,TNNI3,TSPYL1,VIM
	Cell death of osteosarcoma cells	0.00297	3.3	MYB,NUP155,PABPC1,PNO1,POLR2H,PSMA3,PSMB5,PSMC4,RPL27A,RPL3,RPL6,RPL7,RPS19,RPS3,RRM2,SDR16C5,SLC39A7,TTK
	Benign lesion	0.00345	3.077	ABCA1,ADH1B,ADTRP,AHCYL1,ALDOA,ARL4D,B4GALT1,BAP1,BCR,BRIP1,C1orf115,CAVIN2,CCNB2,CEACAM7,CFH,COL7A1,COL8A2,COL9A2,CTSB,CYP1B1,CYP2F1,DCLRE1A,DDR2,DHFR,DHRS11,DMD,DUSP5,ECM2,EDNRA,EGFR,EPPK1,ERBB3,ERBB4,ERRFI1,ETV5,EXT1,EZH1,FAXC,FBLN1,FBN1,FGFR3,FN1,FOXQ1,FTH1,GABRP,GLTP,GNA11,GSTP1,H19,HMGN1,HMOX1,HOPX,HSD17B10,IGF1,IGFBP5,IGHA2,INSR,IQGAP1,IRS2,ITGB4,JCHAIN,KMT2A,KRT10,KRT13,KRT16,KRT18,KRT19,…

## Sheet: Supp Table 10 Inferred Cells
Supplementary Table 10. Inferred lower airway cell subtypes
	CIBERSORT				xCell
Cell Type	≤ 28 days	> 28 days	Deceased	p-value	≤28 days	> 28 days	Deceased	p-value
Alveolar macrophages	0.15[0.03-0.53]	0.13[0-1.2]	0.57[0.096-0.92]	ns	NA	NA	NA	NA
B-cells	0.63[0.31-1.5]	1.4[0.85-1.9]	1.2[0.97-1.8]	0.0019*	0.041[0.019-0.06]	0.039[0.025-0.064]	0.031[0.013-0.037]	0.0456
CCR7+ T-cells	0.6[0.15-1.4]	1.2[0.63-1.7]	1.2[0.91-1.7]	0.0161*	NA	NA	NA	NA
CD4+ T-cells	NA	NA	NA	NA	1.6e-20[0-1.5e-19]	0[0-1.1e-19]	0[0-7.5e-20]	ns
CD8+ T-cells	0.28[0.033-0.66]	0.53[0.1-0.93]	0.58[0.14-0.76]	ns	0[0-3.9e-19]	4.2e-21[0-0.0093]	0[0-5.6e-19]	ns
cDC	0.43[0.16-1.1]	1[0.55-1.5]	1.1[0.54-1.5]	0.0033*	0.072[0.031-0.12]	0.07[0.04-0.12]	0.056[0.028-0.096]	ns
DC	NA	NA	NA	NA	0.0047[0.00067-0.018]	0.0036[2.1e-21-0.011]	0.006[0-0.013]	ns
Epithelial cells	0.76[0.32-2]	1.4[0.76-2.1]	1.4[0.82-2.3]	ns	0.087[0.056-0.13]	0.053[0.03-0.093]	0.065[0.046-0.094]	0.0084
Innate T-cells	0.54[0.22-1.1]	1[0.66-1.2]	0.85[0.78-1.3]	0.0083*	NA	NA	NA	NA
Macrophages	NA	NA	NA	NA	0.046[0.021-0.091]	0.13[0.062-0.15]	0.099[0.06-0.15]	0.0015*
Macrophages M1	0.62[0.27-2.1]	1.7[0.76-3.9]	2.4[1.4-4.3]	0.0051*	0.017[0.003-0.034]	0.046[0.014-0.066]	0.037[0.014-0.058]	0.0049*
Macrophages M2	0.039[0-0.83]	0.95[0-2.2]	0.6[0.011-1.1]	0.0325*	0.031[0.0098-0.072]	0.062[0.037-0.084]	0.06[0.031-0.099]	0.042
Mast cells	0.27[0.075-0.9]	0.85[0.37-1.3]	0.68[0.43-1]	0.0022*	0.018[0.0075-0.031]	0.027[0.018-0.036]	0.023[0.015-0.028]	0.0419
Memory B-cells	NA	NA	NA	NA	0.024[0.016-0.037]	0.019[0.0099-0.028]	0.015[0.007-0.019]	0.0296
Neutrophils	0.83[0.25-2.4]	1.8[0.52-4.6]	1.5[0.5-3.9]	ns	0.089[0.059-0.12]	0.1[0.066-0.13]	0.094[0.061-0.12]	ns
NK cells	0.00052[0-0.68]	0.57[0.0042-1]	0.56[0.24-0.82]	0.0073*	2.4e-21[0-0.0027]	1.5e-18[0-0.024]	0[0-0.0039]	ns
NKT	NA	NA	NA	NA	0.4[0.23-0.56]	0.5[0.32-0.57]	0.45[0.3-0.56]	ns
Other macrophages	0.88[0.41-2]	2.4[0.94-3.2]	1.9[1.5-2.5]	0.0009*	NA	NA	NA	NA
Other T-cells	0.19[0.066-0.39]	0.56[0.22-0.77]	0.55[0.29-0.65]	0.0031*	NA	NA	NA	NA
pDC	0.27[0.12-0.74]	0.77[0.37-1.2]	0.63[0.4-1.1]	0.0055*	0.018[0.005-0.03]	0.023[0.0059-0.057]	0.016[6e-05-0.046]	ns
Plasma cells	0.15[0.052-0.48]	0.39[0.19-0.61]	0.43[0.15-0.56]	ns	0.011[0.0081-0.023]	0.017[0.012-0.024]	0.016[0.011-0.02]	ns
Proliferating T-cells	0.77[0.36-1.3]	1.3[0.88-1.6]	1.3[0.95-1.7]	0.0031*	NA	NA	NA	NA
Tgd cells	NA	NA	NA	NA	0[0-0]	0[0-4.7e-20]	0[0-3.5e-21]	0.0254
Th1 cells	NA	NA	NA	NA	0.049[0.014-0.1]	0.055[0.029-0.1]	0.062[0.033-0.13]	ns
Th2 cells	NA	NA	NA	NA	0.033[0.0019-0.13]	0.024[2e-20-0.12]	0.024[1.4e-19-0.11]	ns
Tregs	0.26[0.091-0.7]	0.74[0.34-1]	0.58[0.42-0.96]	0.0067*	0.063[0.025-0.095]	0.083[0.044-0.13]	0.058[0.024-0.078]	0.0363
Kruskal-Wallis test p-values for comparison of outcomes (* < 0.05 FDR corrected)
Data expressed as median[interquartile range]
DC = dendritic cells
NK cells = natural killer
NKT = natural killer T cells
pDC= Plasmacytoid dendritic cells
Tregs = regulatory T cells

[truncated: 2 more sheets: Sup Table 11 Risk Score, Sup Table 12 IPA risk]
